# Supplementary material
Source: MDPI journal article supplement (https://www.mdpi.com/2410-3888/8/4/178)
Supplement: s1 [file s1]

Article

# Assembly, Characterization, and Phylogenetic Relationships of Mitogenomes of Two Species of Mexican Trout (*Oncorhynchus chrysogaster* and *O. mykiss nelsoni*)

Angélica Colín <sup>1</sup>, Miguel A. Del Río-Portilla <sup>2,\*</sup>, Fabiola Lafarga-De la Cruz <sup>2</sup>,  
Genoveva Ingle-De la Mora <sup>3</sup> and Francisco J. García-De León <sup>1,\*</sup>

<sup>1</sup> Laboratorio de Genética para la Conservación, Centro de Investigaciones Biológicas del Noroeste, Instituto Politécnico Nacional, No. 195, Col. Playa Palo de Santa Rita, CP 23096 La Paz, Baja California Sur, Mexico

<sup>2</sup> Departamento de Acuicultura, Centro de Investigación Científica y de Educación Superior de Ensenada, Carretera Ensenada-Tijuana, No. 3918, Zona Playitas, CP 22860 Ensenada, Baja California, Mexico

<sup>3</sup> Instituto Nacional de Pesca y Acuicultura, Secretaría de Agricultura y Desarrollo Rural (SADER), Avenida México, No. 190, Col del Carmen, CP 04100 Coyoacán, Ciudad de México, Mexico

\* Correspondence: mdelrio@cicese.mx (M.A.D.R.-P.); fgarciadl@cibnor.mx (F.J.G.-D.L.)

**Table S1.** Nucleotide composition of the complete mitochondrial genome in Salmonids.

| Species                                 | Length | %T(U) | %C   | %A   | %G   | %AT  | %GC  | Accession ID |
|-----------------------------------------|--------|-------|------|------|------|------|------|--------------|
| <i>Brachymystax lenok</i>               | 16832  | 26.7  | 28.7 | 28.3 | 16.3 | 55.0 | 45.0 | JQ686730     |
| <i>Brachymystax lenok</i>               | 16832  | 26.7  | 28.7 | 28.3 | 16.3 | 55.0 | 45.0 | NC 018341    |
| <i>Brachymystax lenok tsinlingensis</i> | 16748  | 26.7  | 28.7 | 28.2 | 16.4 | 54.9 | 45.1 | JQ675732     |
| <i>Brachymystax lenok tsinlingensis</i> | 16669  | 26.6  | 28.7 | 28.2 | 16.4 | 54.8 | 45.2 | JQ686731     |
| <i>Brachymystax lenok tsinlingensis</i> | 16669  | 26.6  | 28.7 | 28.2 | 16.4 | 54.8 | 45.2 | NC 018342    |
| <i>Brachymystax tsinlingensis</i>       | 16823  | 26.7  | 28.6 | 28.3 | 16.3 | 55.0 | 45.0 | KY124134     |
| <i>Brachymystax tsinlingensis</i>       | 16823  | 26.7  | 28.6 | 28.3 | 16.3 | 55.0 | 45.0 | MK599201     |
| <i>Brachymystax tumensis</i>            | 16836  | 26.9  | 28.5 | 28.2 | 16.3 | 55.1 | 44.9 | KJ730524     |
| <i>Brachymystax tumensis</i>            | 16836  | 26.9  | 28.5 | 28.2 | 16.3 | 55.1 | 44.9 | NC 024674    |
| <i>Brachymystax tumensis</i>            | 16754  | 26.9  | 28.5 | 28.2 | 16.4 | 55.1 | 44.9 | KJ730525     |
| <i>Coregonus artedi</i>                 | 16820  | 26.1  | 28.9 | 26.8 | 18.1 | 53.0 | 47.0 | MW856899     |
| <i>Coregonus artedi</i>                 | 16820  | 26.1  | 28.9 | 26.9 | 18.1 | 53.0 | 47.0 | MH301055     |
| <i>Coregonus artedi</i>                 | 16917  | 26.2  | 28.9 | 27.0 | 18.0 | 53.1 | 46.9 | MH301056     |
| <i>Coregonus artedi</i>                 | 16819  | 26.1  | 28.9 | 26.9 | 18.1 | 53.0 | 47.0 | MF621766     |
| <i>Coregonus artedi</i>                 | 16820  | 26.1  | 28.9 | 26.9 | 18.1 | 53.0 | 47.0 | MW856900     |
| <i>Coregonus artedi</i>                 | 16820  | 26.1  | 28.9 | 26.9 | 18.1 | 53.0 | 47.0 | MF621765     |
| <i>Coregonus artedi</i>                 | 16820  | 26.1  | 28.9 | 26.9 | 18.1 | 53.0 | 47.0 | NC 036393    |
| <i>Coregonus autumnalis</i>             | 16736  | 25.7  | 29.4 | 26.7 | 18.1 | 52.4 | 47.6 | KP452507     |
| <i>Coregonus autumnalis</i>             | 16736  | 25.7  | 29.4 | 26.7 | 18.1 | 52.4 | 47.6 | NC 027277    |
| <i>Coregonus baicalensis</i>            | 16729  | 25.7  | 29.4 | 26.8 | 18.1 | 52.5 | 47.5 | MN394786     |
| <i>Coregonus baicalensis</i>            | 16728  | 25.7  | 29.4 | 26.8 | 18.1 | 52.5 | 47.5 | MN394784     |
| <i>Coregonus baicalensis</i>            | 16728  | 25.7  | 29.4 | 26.8 | 18.1 | 52.5 | 47.5 | NC 045226    |
| <i>Coregonus baicalensis</i>            | 16732  | 25.7  | 29.4 | 26.8 | 18.1 | 52.5 | 47.5 | MN394785     |
| <i>Coregonus chadary</i>                | 16739  | 25.7  | 29.4 | 26.8 | 18.1 | 52.5 | 47.5 | KU530206     |
| <i>Coregonus chadary</i>                | 16739  | 25.7  | 29.4 | 26.8 | 18.1 | 52.5 | 47.5 | NC 030175    |
| <i>Coregonus clupeaformis</i>           | 16736  | 25.7  | 29.5 | 26.7 | 18.2 | 52.4 | 47.6 | JQ661482     |
| <i>Coregonus clupeaformis</i>           | 16735  | 25.7  | 29.4 | 26.7 | 18.2 | 52.4 | 47.6 | JQ661487     |
| <i>Coregonus clupeaformis</i>           | 16735  | 25.7  | 29.5 | 26.7 | 18.1 | 52.4 | 47.6 | JQ661483     |
| <i>Coregonus clupeaformis</i>           | 16734  | 25.7  | 29.4 | 26.7 | 18.2 | 52.4 | 47.6 | JQ661484     |
| <i>Coregonus clupeaformis</i>           | 16736  | 25.7  | 29.4 | 26.7 | 18.1 | 52.4 | 47.6 | JQ661485     |
| <i>Coregonus clupeaformis</i>           | 16734  | 25.7  | 29.5 | 26.7 | 18.1 | 52.4 | 47.6 | JQ661486     |
| <i>Coregonus clupeaformis</i>           | 16736  | 25.7  | 29.4 | 26.7 | 18.2 | 52.4 | 47.6 | CM036501     |
| <i>Coregonus clupeaformis</i>           | 16731  | 25.7  | 29.4 | 26.7 | 18.2 | 52.4 | 47.6 | CM031715     |
| <i>Coregonus clupeaformis</i>           | 16739  | 25.7  | 29.4 | 26.7 | 18.1 | 52.4 | 47.6 | MH301057     |
| <i>Coregonus clupeaformis</i>           | 16736  | 25.7  | 29.4 | 26.7 | 18.1 | 52.4 | 47.6 | MH301058     |
| <i>Coregonus clupeaformis</i>           | 16744  | 25.7  | 29.4 | 26.7 | 18.1 | 52.4 | 47.6 | NC 020762    |
| <i>Coregonus clupeaformis</i>           | 16744  | 25.7  | 29.4 | 26.7 | 18.1 | 52.4 | 47.6 | JQ390060     |
| <i>Coregonus hoyi</i>                   | 16820  | 26.1  | 28.9 | 26.9 | 18.1 | 53.0 | 47.0 | MW856901     |
| <i>Coregonus hoyi</i>                   | 16820  | 26.1  | 28.9 | 26.8 | 18.1 | 53.0 | 47.0 | MW856902     |
| <i>Coregonus hoyi</i>                   | 16820  | 26.1  | 28.9 | 26.9 | 18.1 | 53.0 | 47.0 | MW856853     |

|                            |       |      |      |      |      |      |      |           |
|----------------------------|-------|------|------|------|------|------|------|-----------|
| <i>Coregonus hoyi</i>      | 16820 | 26.1 | 28.9 | 26.9 | 18.1 | 53.0 | 47.0 | MT667235  |
| <i>Coregonus hoyi</i>      | 16820 | 26.1 | 28.9 | 26.9 | 18.1 | 53.0 | 47.0 | NC 054288 |
| <i>Coregonus lavaretus</i> | 16738 | 25.7 | 29.5 | 26.8 | 18.1 | 52.5 | 47.5 | MK913369  |
| <i>Coregonus lavaretus</i> | 16736 | 25.7 | 29.5 | 26.8 | 18.1 | 52.5 | 47.5 | JQ661384  |
| <i>Coregonus lavaretus</i> | 16736 | 25.7 | 29.5 | 26.8 | 18.1 | 52.5 | 47.5 | JQ661386  |
| <i>Coregonus lavaretus</i> | 16736 | 25.7 | 29.5 | 26.8 | 18.0 | 52.5 | 47.5 | JQ661387  |
| <i>Coregonus lavaretus</i> | 16736 | 25.7 | 29.5 | 26.8 | 18.1 | 52.5 | 47.5 | JQ661389  |
| <i>Coregonus lavaretus</i> | 16736 | 25.7 | 29.5 | 26.8 | 18.0 | 52.5 | 47.5 | JQ661383  |
| <i>Coregonus lavaretus</i> | 16737 | 25.7 | 29.5 | 26.8 | 18.1 | 52.5 | 47.5 | JQ661382  |
| <i>Coregonus lavaretus</i> | 16737 | 25.7 | 29.5 | 26.8 | 18.1 | 52.5 | 47.5 | JQ661388  |
| <i>Coregonus lavaretus</i> | 16736 | 25.7 | 29.5 | 26.8 | 18.1 | 52.5 | 47.5 | JQ661385  |
| <i>Coregonus lavaretus</i> | 16736 | 25.7 | 29.4 | 26.8 | 18.1 | 52.5 | 47.5 | JQ661436  |
| <i>Coregonus lavaretus</i> | 16736 | 25.7 | 29.4 | 26.8 | 18.1 | 52.5 | 47.5 | JQ661437  |
| <i>Coregonus lavaretus</i> | 16736 | 25.7 | 29.4 | 26.8 | 18.1 | 52.5 | 47.5 | JQ661440  |
| <i>Coregonus lavaretus</i> | 16736 | 25.7 | 29.4 | 26.8 | 18.1 | 52.5 | 47.5 | JQ661435  |
| <i>Coregonus lavaretus</i> | 16737 | 25.7 | 29.4 | 26.8 | 18.1 | 52.5 | 47.5 | JQ661441  |
| <i>Coregonus lavaretus</i> | 16737 | 25.7 | 29.4 | 26.8 | 18.0 | 52.5 | 47.5 | JQ661438  |
| <i>Coregonus lavaretus</i> | 16737 | 25.7 | 29.5 | 26.8 | 18.1 | 52.5 | 47.5 | JQ661439  |
| <i>Coregonus lavaretus</i> | 16736 | 25.7 | 29.4 | 26.8 | 18.1 | 52.5 | 47.5 | JQ661426  |
| <i>Coregonus lavaretus</i> | 16736 | 25.7 | 29.4 | 26.8 | 18.1 | 52.5 | 47.5 | JQ661425  |
| <i>Coregonus lavaretus</i> | 16736 | 25.7 | 29.4 | 26.8 | 18.1 | 52.5 | 47.5 | JQ661422  |
| <i>Coregonus lavaretus</i> | 16736 | 25.7 | 29.4 | 26.8 | 18.1 | 52.5 | 47.5 | JQ661419  |
| <i>Coregonus lavaretus</i> | 16736 | 25.7 | 29.5 | 26.8 | 18.1 | 52.5 | 47.5 | JQ661423  |
| <i>Coregonus lavaretus</i> | 16736 | 25.7 | 29.4 | 26.8 | 18.1 | 52.5 | 47.5 | JQ661421  |
| <i>Coregonus lavaretus</i> | 16737 | 25.7 | 29.4 | 26.8 | 18.1 | 52.5 | 47.5 | JQ661424  |
| <i>Coregonus lavaretus</i> | 16736 | 25.7 | 29.4 | 26.8 | 18.1 | 52.5 | 47.5 | JQ661420  |
| <i>Coregonus lavaretus</i> | 16736 | 25.7 | 29.4 | 26.8 | 18.1 | 52.5 | 47.5 | JQ661473  |
| <i>Coregonus lavaretus</i> | 16736 | 25.7 | 29.4 | 26.8 | 18.1 | 52.4 | 47.6 | JQ661469  |
| <i>Coregonus lavaretus</i> | 16736 | 25.7 | 29.4 | 26.8 | 18.1 | 52.4 | 47.6 | JQ661481  |
| <i>Coregonus lavaretus</i> | 16736 | 25.7 | 29.5 | 26.8 | 18.1 | 52.4 | 47.6 | JQ661479  |
| <i>Coregonus lavaretus</i> | 16736 | 25.7 | 29.4 | 26.8 | 18.1 | 52.5 | 47.5 | JQ661476  |
| <i>Coregonus lavaretus</i> | 16736 | 25.7 | 29.4 | 26.8 | 18.1 | 52.4 | 47.6 | JQ661477  |
| <i>Coregonus lavaretus</i> | 16736 | 25.7 | 29.4 | 26.8 | 18.1 | 52.5 | 47.5 | JQ661478  |
| <i>Coregonus lavaretus</i> | 16736 | 25.7 | 29.4 | 26.8 | 18.1 | 52.5 | 47.5 | JQ661480  |
| <i>Coregonus lavaretus</i> | 16737 | 25.7 | 29.4 | 26.8 | 18.1 | 52.5 | 47.5 | JQ661471  |
| <i>Coregonus lavaretus</i> | 16736 | 25.7 | 29.4 | 26.8 | 18.1 | 52.4 | 47.6 | JQ661472  |
| <i>Coregonus lavaretus</i> | 16736 | 25.7 | 29.4 | 26.8 | 18.1 | 52.4 | 47.6 | JQ661464  |
| <i>Coregonus lavaretus</i> | 16736 | 25.7 | 29.4 | 26.8 | 18.1 | 52.5 | 47.5 | JQ661468  |
| <i>Coregonus lavaretus</i> | 16736 | 25.7 | 29.4 | 26.8 | 18.1 | 52.5 | 47.5 | JQ661463  |
| <i>Coregonus lavaretus</i> | 16736 | 25.7 | 29.4 | 26.8 | 18.1 | 52.4 | 47.6 | JQ661475  |
| <i>Coregonus lavaretus</i> | 16737 | 25.7 | 29.4 | 26.8 | 18.1 | 52.5 | 47.5 | JQ661470  |
| <i>Coregonus lavaretus</i> | 16736 | 25.7 | 29.4 | 26.8 | 18.1 | 52.5 | 47.5 | JQ661465  |
| <i>Coregonus lavaretus</i> | 16736 | 25.7 | 29.5 | 26.8 | 18.1 | 52.5 | 47.5 | JQ661474  |

|                              |       |      |      |      |      |      |      |           |
|------------------------------|-------|------|------|------|------|------|------|-----------|
| <i>Coregonus lavaretus</i>   | 16737 | 25.7 | 29.4 | 26.8 | 18.1 | 52.5 | 47.5 | JQ661466  |
| <i>Coregonus lavaretus</i>   | 16737 | 25.7 | 29.4 | 26.8 | 18.1 | 52.5 | 47.5 | JQ661467  |
| <i>Coregonus lavaretus</i>   | 16736 | 25.7 | 29.4 | 26.8 | 18.1 | 52.4 | 47.6 | JQ661462  |
| <i>Coregonus lavaretus</i>   | 16737 | 25.7 | 29.5 | 26.8 | 18.0 | 52.5 | 47.5 | JQ661445  |
| <i>Coregonus lavaretus</i>   | 16735 | 25.7 | 29.4 | 26.8 | 18.1 | 52.5 | 47.5 | JQ661454  |
| <i>Coregonus lavaretus</i>   | 16736 | 25.7 | 29.4 | 26.8 | 18.1 | 52.5 | 47.5 | JQ661453  |
| <i>Coregonus lavaretus</i>   | 16736 | 25.7 | 29.5 | 26.8 | 18.1 | 52.5 | 47.5 | JQ661457  |
| <i>Coregonus lavaretus</i>   | 16737 | 25.7 | 29.4 | 26.8 | 18.1 | 52.5 | 47.5 | JQ661446  |
| <i>Coregonus lavaretus</i>   | 16735 | 25.7 | 29.4 | 26.8 | 18.1 | 52.4 | 47.6 | JQ661456  |
| <i>Coregonus lavaretus</i>   | 16737 | 25.7 | 29.4 | 26.7 | 18.1 | 52.5 | 47.5 | JQ661451  |
| <i>Coregonus lavaretus</i>   | 16737 | 25.7 | 29.4 | 26.8 | 18.1 | 52.5 | 47.5 | JQ661452  |
| <i>Coregonus lavaretus</i>   | 16736 | 25.7 | 29.4 | 26.8 | 18.1 | 52.5 | 47.5 | JQ661444  |
| <i>Coregonus lavaretus</i>   | 16736 | 25.7 | 29.4 | 26.8 | 18.1 | 52.5 | 47.5 | JQ661455  |
| <i>Coregonus lavaretus</i>   | 16737 | 25.7 | 29.4 | 26.8 | 18.1 | 52.5 | 47.5 | JQ661443  |
| <i>Coregonus lavaretus</i>   | 16737 | 25.7 | 29.4 | 26.7 | 18.1 | 52.4 | 47.6 | JQ661449  |
| <i>Coregonus lavaretus</i>   | 16737 | 25.7 | 29.4 | 26.8 | 18.1 | 52.5 | 47.5 | JQ661447  |
| <i>Coregonus lavaretus</i>   | 16736 | 25.7 | 29.4 | 26.8 | 18.1 | 52.5 | 47.5 | JQ661458  |
| <i>Coregonus lavaretus</i>   | 16736 | 25.7 | 29.5 | 26.8 | 18.1 | 52.5 | 47.5 | JQ661393  |
| <i>Coregonus lavaretus</i>   | 16736 | 25.7 | 29.5 | 26.8 | 18.0 | 52.5 | 47.5 | JQ661390  |
| <i>Coregonus lavaretus</i>   | 16736 | 25.7 | 29.5 | 26.8 | 18.1 | 52.4 | 47.6 | JQ661392  |
| <i>Coregonus lavaretus</i>   | 16737 | 25.7 | 29.4 | 26.8 | 18.1 | 52.5 | 47.5 | JQ661431  |
| <i>Coregonus lavaretus</i>   | 16736 | 25.7 | 29.4 | 26.8 | 18.0 | 52.5 | 47.5 | JQ661432  |
| <i>Coregonus lavaretus</i>   | 16736 | 25.7 | 29.4 | 26.8 | 18.1 | 52.5 | 47.5 | JQ661427  |
| <i>Coregonus lavaretus</i>   | 16736 | 25.7 | 29.5 | 26.8 | 18.1 | 52.5 | 47.5 | JQ661442  |
| <i>Coregonus lavaretus</i>   | 16737 | 25.7 | 29.4 | 26.8 | 18.1 | 52.5 | 47.5 | JQ661450  |
| <i>Coregonus lavaretus</i>   | 16737 | 25.7 | 29.4 | 26.8 | 18.1 | 52.5 | 47.5 | JQ661460  |
| <i>Coregonus lavaretus</i>   | 16737 | 25.7 | 29.4 | 26.8 | 18.1 | 52.5 | 47.5 | JQ661461  |
| <i>Coregonus lavaretus</i>   | 16736 | 25.7 | 29.4 | 26.8 | 18.1 | 52.4 | 47.6 | JQ661459  |
| <i>Coregonus lavaretus</i>   | 16736 | 25.7 | 29.4 | 26.8 | 18.1 | 52.5 | 47.5 | JQ661448  |
| <i>Coregonus lavaretus</i>   | 16737 | 25.7 | 29.5 | 26.8 | 18.0 | 52.5 | 47.5 | JQ661394  |
| <i>Coregonus lavaretus</i>   | 16737 | 25.7 | 29.5 | 26.8 | 18.0 | 52.5 | 47.5 | JQ661396  |
| <i>Coregonus lavaretus</i>   | 16736 | 25.7 | 29.5 | 26.8 | 18.0 | 52.5 | 47.5 | JQ661397  |
| <i>Coregonus lavaretus</i>   | 16736 | 25.7 | 29.5 | 26.8 | 18.1 | 52.4 | 47.6 | JQ661395  |
| <i>Coregonus lavaretus</i>   | 16736 | 25.7 | 29.5 | 26.8 | 18.1 | 52.5 | 47.5 | JQ661391  |
| <i>Coregonus lavaretus</i>   | 16737 | 25.7 | 29.4 | 26.8 | 18.1 | 52.5 | 47.5 | JQ661430  |
| <i>Coregonus lavaretus</i>   | 16736 | 25.7 | 29.4 | 26.8 | 18.1 | 52.5 | 47.5 | JQ661434  |
| <i>Coregonus lavaretus</i>   | 16737 | 25.7 | 29.4 | 26.8 | 18.1 | 52.5 | 47.5 | JQ661428  |
| <i>Coregonus lavaretus</i>   | 16736 | 25.7 | 29.4 | 26.8 | 18.1 | 52.5 | 47.5 | JQ661433  |
| <i>Coregonus lavaretus</i>   | 16736 | 25.7 | 29.4 | 26.8 | 18.1 | 52.5 | 47.5 | JQ661429  |
| <i>Coregonus lavaretus</i>   | 16737 | 25.7 | 29.5 | 26.7 | 18.1 | 52.4 | 47.6 | AB034824  |
| <i>Coregonus lavaretus</i>   | 16737 | 25.7 | 29.5 | 26.7 | 18.1 | 52.4 | 47.6 | NC 002646 |
| <i>Coregonus migratorius</i> | 16737 | 25.7 | 29.4 | 26.8 | 18.1 | 52.5 | 47.5 | MN394787  |
| <i>Coregonus migratorius</i> | 16737 | 25.7 | 29.4 | 26.8 | 18.1 | 52.5 | 47.5 | NC 045227 |

|                                   |       |      |      |      |      |      |      |           |
|-----------------------------------|-------|------|------|------|------|------|------|-----------|
| <i>Coregonus migratorius</i>      | 16737 | 25.7 | 29.4 | 26.8 | 18.1 | 52.5 | 47.5 | MN394788  |
| <i>Coregonus migratorius</i>      | 16737 | 25.7 | 29.4 | 26.8 | 18.1 | 52.5 | 47.5 | MN394789  |
| <i>Coregonus muksun</i>           | 16736 | 25.7 | 29.5 | 26.8 | 18.0 | 52.5 | 47.5 | KT824877  |
| <i>Coregonus muksun</i>           | 16736 | 25.7 | 29.5 | 26.8 | 18.0 | 52.5 | 47.5 | NC 028593 |
| <i>Coregonus nasus</i>            | 16739 | 25.7 | 29.4 | 26.8 | 18.1 | 52.5 | 47.5 | JQ390058  |
| <i>Coregonus nasus</i>            | 16739 | 25.7 | 29.4 | 26.8 | 18.1 | 52.5 | 47.5 | NC 020760 |
| <i>Coregonus oxyrinchus</i>       | 16735 | 25.7 | 29.5 | 26.8 | 18.1 | 52.5 | 47.5 | JQ661417  |
| <i>Coregonus oxyrinchus</i>       | 16735 | 25.7 | 29.5 | 26.8 | 18.1 | 52.5 | 47.5 | JQ661415  |
| <i>Coregonus oxyrinchus</i>       | 16736 | 25.7 | 29.4 | 26.8 | 18.1 | 52.5 | 47.5 | JQ661412  |
| <i>Coregonus oxyrinchus</i>       | 16736 | 25.7 | 29.4 | 26.8 | 18.1 | 52.5 | 47.5 | JQ661406  |
| <i>Coregonus oxyrinchus</i>       | 16737 | 25.7 | 29.4 | 26.8 | 18.1 | 52.5 | 47.5 | JQ661416  |
| <i>Coregonus oxyrinchus</i>       | 16737 | 25.7 | 29.5 | 26.8 | 18.0 | 52.5 | 47.5 | JQ661401  |
| <i>Coregonus oxyrinchus</i>       | 16737 | 25.7 | 29.5 | 26.8 | 18.1 | 52.5 | 47.5 | JQ661400  |
| <i>Coregonus oxyrinchus</i>       | 16736 | 25.7 | 29.4 | 26.8 | 18.1 | 52.5 | 47.5 | JQ661403  |
| <i>Coregonus oxyrinchus</i>       | 16737 | 25.7 | 29.4 | 26.8 | 18.0 | 52.5 | 47.5 | JQ661405  |
| <i>Coregonus oxyrinchus</i>       | 16736 | 25.7 | 29.4 | 26.8 | 18.1 | 52.5 | 47.5 | JQ661399  |
| <i>Coregonus oxyrinchus</i>       | 16737 | 25.7 | 29.4 | 26.8 | 18.0 | 52.5 | 47.5 | JQ661411  |
| <i>Coregonus oxyrinchus</i>       | 16736 | 25.7 | 29.5 | 26.8 | 18.0 | 52.5 | 47.5 | JQ661404  |
| <i>Coregonus oxyrinchus</i>       | 16736 | 25.7 | 29.5 | 26.8 | 18.1 | 52.5 | 47.5 | JQ661410  |
| <i>Coregonus oxyrinchus</i>       | 16736 | 25.7 | 29.4 | 26.8 | 18.1 | 52.5 | 47.5 | JQ661407  |
| <i>Coregonus oxyrinchus</i>       | 16737 | 25.7 | 29.4 | 26.8 | 18.0 | 52.5 | 47.5 | JQ661418  |
| <i>Coregonus oxyrinchus</i>       | 16737 | 25.7 | 29.4 | 26.8 | 18.0 | 52.5 | 47.5 | NC 020765 |
| <i>Coregonus oxyrinchus</i>       | 16735 | 25.7 | 29.4 | 26.8 | 18.1 | 52.5 | 47.5 | JQ661409  |
| <i>Coregonus oxyrinchus</i>       | 16735 | 25.7 | 29.4 | 26.8 | 18.1 | 52.5 | 47.5 | JQ661408  |
| <i>Coregonus oxyrinchus</i>       | 16737 | 25.7 | 29.4 | 26.8 | 18.0 | 52.5 | 47.5 | JQ661398  |
| <i>Coregonus oxyrinchus</i>       | 16736 | 25.7 | 29.4 | 26.8 | 18.1 | 52.5 | 47.5 | JQ661402  |
| <i>Coregonus oxyrinchus</i>       | 16737 | 25.7 | 29.4 | 26.8 | 18.1 | 52.5 | 47.5 | JQ661414  |
| <i>Coregonus oxyrinchus</i>       | 16736 | 25.7 | 29.4 | 26.8 | 18.1 | 52.5 | 47.5 | JQ661413  |
| <i>Coregonus peled</i>            | 16736 | 25.7 | 29.4 | 26.8 | 18.1 | 52.4 | 47.6 | KM361633  |
| <i>Coregonus peled</i>            | 16736 | 25.7 | 29.4 | 26.8 | 18.1 | 52.4 | 47.6 | NC 025576 |
| <i>Coregonus sp. cluncaformis</i> | 16736 | 25.7 | 29.5 | 26.8 | 18.1 | 52.4 | 47.6 | KT375339  |
| <i>Coregonus sp. cluncaformis</i> | 16736 | 25.7 | 29.5 | 26.8 | 18.1 | 52.4 | 47.6 | NC 028198 |
| <i>Coregonus ussuriensis</i>      | 16737 | 25.7 | 29.5 | 26.8 | 18.1 | 52.4 | 47.6 | KM210289  |
| <i>Coregonus ussuriensis</i>      | 16737 | 25.7 | 29.5 | 26.8 | 18.1 | 52.4 | 47.6 | NC 025648 |
| <i>Hucho bleekeri</i>             | 16997 | 26.7 | 28.8 | 28.0 | 16.5 | 54.7 | 45.3 | HM804473  |
| <i>Hucho bleekeri</i>             | 16837 | 26.8 | 28.7 | 27.9 | 16.6 | 54.7 | 45.3 | KF908853  |
| <i>Hucho bleekeri</i>             | 16997 | 26.7 | 28.8 | 28.0 | 16.5 | 54.7 | 45.3 | NC 015995 |
| <i>Hucho hucho</i>                | 16751 | 26.6 | 28.8 | 27.9 | 16.7 | 54.5 | 45.5 | KM588351  |
| <i>Hucho hucho</i>                | 16751 | 26.6 | 28.8 | 27.9 | 16.7 | 54.5 | 45.5 | NC 025589 |
| <i>Hucho taimen</i>               | 16834 | 26.7 | 28.8 | 28.0 | 16.6 | 54.6 | 45.4 | MK258084  |
| <i>Hucho taimen</i>               | 16834 | 26.7 | 28.8 | 28.0 | 16.6 | 54.6 | 45.4 | MK258083  |
| <i>Hucho taimen</i>               | 16833 | 26.7 | 28.7 | 28.0 | 16.6 | 54.7 | 45.3 | MK258082  |
| <i>Hucho taimen</i>               | 16915 | 26.7 | 28.7 | 28.0 | 16.6 | 54.7 | 45.3 | MK258081  |

|                                        |       |      |      |      |      |      |      |           |            |
|----------------------------------------|-------|------|------|------|------|------|------|-----------|------------|
| <i>Hucho taimen</i>                    | 16915 | 26.7 | 28.7 | 28.0 | 16.6 | 54.7 | 45.3 | MK258080  | this study |
| <i>Hucho taimen</i>                    | 16833 | 26.7 | 28.8 | 28.0 | 16.6 | 54.6 | 45.4 | KJ711550  |            |
| <i>Hucho taimen</i>                    | 16914 | 26.7 | 28.7 | 28.0 | 16.6 | 54.7 | 45.3 | KJ711549  |            |
| <i>Hucho taimen</i>                    | 16834 | 26.7 | 28.7 | 27.8 | 16.7 | 54.6 | 45.4 | MK258079  |            |
| <i>Hucho taimen</i>                    | 16834 | 26.7 | 28.7 | 27.8 | 16.7 | 54.6 | 45.4 | MK258078  |            |
| <i>Hucho taimen</i>                    | 16834 | 26.7 | 28.8 | 27.8 | 16.7 | 54.6 | 45.4 | MK258077  |            |
| <i>Hucho taimen</i>                    | 16833 | 26.7 | 28.8 | 28.0 | 16.6 | 54.6 | 45.4 | HQ897271  |            |
| <i>Hucho taimen</i>                    | 16833 | 26.7 | 28.8 | 28.0 | 16.6 | 54.6 | 45.4 | NC 016426 |            |
| <i>Oncorhynchus chrysogaster</i>       | 16655 | 26.2 | 29.0 | 27.9 | 17.0 | 54.1 | 45.9 | OP902890  |            |
| <i>Oncorhynchus clarkii henshawi</i>   | 16658 | 26.2 | 28.9 | 27.7 | 17.2 | 53.9 | 46.1 | AY886762  |            |
| <i>Oncorhynchus clarkii henshawi</i>   | 16658 | 26.2 | 28.9 | 27.7 | 17.2 | 53.9 | 46.1 | NC 006897 |            |
| <i>Oncorhynchus clarkii stomias</i>    | 16657 | 26.2 | 28.9 | 27.7 | 17.2 | 53.9 | 46.1 | KP013107  |            |
| <i>Oncorhynchus clarkii stomias</i>    | 16657 | 26.2 | 29.0 | 27.7 | 17.2 | 53.9 | 46.1 | KP013117  |            |
| <i>Oncorhynchus clarkii virginalis</i> | 16659 | 26.2 | 28.9 | 27.6 | 17.3 | 53.8 | 46.2 | MW300344  |            |
| <i>Oncorhynchus clarkii virginalis</i> | 16659 | 26.2 | 28.9 | 27.6 | 17.3 | 53.8 | 46.2 | MW300343  |            |
| <i>Oncorhynchus gilae</i>              | 16654 | 26.2 | 28.9 | 27.9 | 17.0 | 54.1 | 45.9 | MW300334  |            |
| <i>Oncorhynchus gilae</i>              | 16654 | 26.2 | 28.9 | 27.9 | 17.0 | 54.1 | 45.9 | NC 056957 |            |
| <i>Oncorhynchus gilae</i>              | 16654 | 26.2 | 28.9 | 27.9 | 17.0 | 54.1 | 45.9 | MW300335  |            |
| <i>Oncorhynchus gilae</i>              | 16654 | 26.2 | 28.9 | 27.9 | 17.0 | 54.1 | 45.9 | MW300336  |            |
| <i>Oncorhynchus gilae apache</i>       | 16656 | 26.3 | 28.9 | 27.9 | 16.9 | 54.2 | 45.8 | MW300342  |            |
| <i>Oncorhynchus gorbuscha</i>          | 16641 | 27.8 | 17.1 | 26.4 | 28.7 | 54.2 | 45.8 | CM029873  |            |
| <i>Oncorhynchus gorbuscha</i>          | 16785 | 26.5 | 28.6 | 27.9 | 17.0 | 54.4 | 45.6 | EF455489  |            |
| <i>Oncorhynchus gorbuscha</i>          | 16785 | 26.5 | 28.6 | 27.9 | 17.0 | 54.4 | 45.6 | NC 010959 |            |
| <i>Oncorhynchus keta</i>               | 16655 | 26.3 | 28.7 | 27.9 | 17.0 | 54.2 | 45.8 | AP010773  |            |
| <i>Oncorhynchus keta</i>               | 16655 | 26.3 | 28.7 | 27.9 | 17.0 | 54.2 | 45.8 | NC 017838 |            |
| <i>Oncorhynchus keta</i>               | 16654 | 26.2 | 29.0 | 27.8 | 17.0 | 54.0 | 46.0 | KY320492  |            |
| <i>Oncorhynchus kisutch</i>            | 16660 | 25.9 | 29.1 | 27.8 | 17.2 | 53.8 | 46.2 | CM018699  |            |
| <i>Oncorhynchus kisutch</i>            | 16660 | 25.9 | 29.1 | 27.8 | 17.2 | 53.7 | 46.3 | MH003640  |            |
| <i>Oncorhynchus kisutch</i>            | 16660 | 25.9 | 29.0 | 27.8 | 17.2 | 53.8 | 46.2 | MF621751  |            |
| <i>Oncorhynchus kisutch</i>            | 16659 | 25.9 | 29.0 | 27.8 | 17.2 | 53.8 | 46.2 | EF126369  |            |
| <i>Oncorhynchus kisutch</i>            | 16659 | 25.9 | 29.0 | 27.8 | 17.2 | 53.8 | 46.2 | NC 009263 |            |
| <i>Oncorhynchus kisutch</i>            | 16659 | 25.9 | 29.0 | 27.8 | 17.2 | 53.8 | 46.2 | MF621749  |            |
| <i>Oncorhynchus masou biwa</i>         | 16652 | 26.8 | 28.1 | 28.6 | 16.5 | 55.4 | 44.6 | EF105342  |            |
| <i>Oncorhynchus masou biwa</i>         | 16652 | 26.8 | 28.1 | 28.6 | 16.5 | 55.4 | 44.6 | NC 009262 |            |
| <i>Oncorhynchus masou formosanus</i>   | 16652 | 26.8 | 28.1 | 28.6 | 16.4 | 55.4 | 44.6 | DQ858456  |            |
| <i>Oncorhynchus masou formosanus</i>   | 16653 | 26.8 | 28.1 | 28.6 | 16.4 | 55.4 | 44.6 | KU523579  |            |
| <i>Oncorhynchus masou formosanus</i>   | 16648 | 26.8 | 28.1 | 28.6 | 16.5 | 55.4 | 44.6 | KY250421  |            |
| <i>Oncorhynchus masou formosanus</i>   | 16652 | 26.8 | 28.1 | 28.6 | 16.4 | 55.4 | 44.6 | NC 008745 |            |
| <i>Oncorhynchus masou ishikawae</i>    | 16652 | 26.8 | 28.1 | 28.6 | 16.5 | 55.4 | 44.6 | DQ864464  |            |
| <i>Oncorhynchus masou ishikawae</i>    | 16652 | 26.8 | 28.1 | 28.6 | 16.5 | 55.4 | 44.6 | NC 008746 |            |
| <i>Oncorhynchus masou masou</i>        | 16704 | 26.8 | 28.4 | 28.2 | 16.5 | 55.1 | 44.9 | KY320493  |            |
| <i>Oncorhynchus masou masou</i>        | 16652 | 26.8 | 28.1 | 28.6 | 16.5 | 55.4 | 44.6 | DQ864465  |            |
| <i>Oncorhynchus masou masou</i>        | 16652 | 26.8 | 28.1 | 28.6 | 16.5 | 55.4 | 44.6 | NC 008747 |            |

|                                          |       |      |      |      |      |      |      |           |            |
|------------------------------------------|-------|------|------|------|------|------|------|-----------|------------|
| <i>Oncorhynchus mykiss</i>               | 16656 | 26.2 | 29.0 | 27.9 | 16.9 | 54.1 | 45.9 | DQ288268  |            |
| <i>Oncorhynchus mykiss</i>               | 16642 | 26.2 | 28.9 | 27.9 | 17.0 | 54.0 | 46.0 | NC 001717 |            |
| <i>Oncorhynchus mykiss</i>               | 16660 | 26.2 | 28.9 | 27.9 | 17.0 | 54.0 | 46.0 | MF621750  |            |
| <i>Oncorhynchus mykiss</i>               | 16642 | 26.2 | 28.9 | 27.9 | 17.0 | 54.0 | 46.0 | L29771    |            |
| <i>Oncorhynchus mykiss</i>               | 16656 | 26.1 | 29.0 | 27.9 | 17.0 | 54.1 | 45.9 | DQ288269  |            |
| <i>Oncorhynchus mykiss</i>               | 16656 | 26.2 | 29.0 | 27.9 | 17.0 | 54.1 | 45.9 | DQ288270  |            |
| <i>Oncorhynchus mykiss</i>               | 16656 | 26.2 | 28.9 | 27.9 | 16.9 | 54.1 | 45.9 | DQ288271  |            |
| <i>Oncorhynchus mykiss</i>               | 16656 | 26.2 | 28.9 | 27.8 | 17.0 | 54.1 | 45.9 | KP085590  |            |
| <i>Oncorhynchus mykiss</i>               | 16658 | 26.2 | 28.9 | 27.9 | 17.0 | 54.1 | 45.9 | MT410879  |            |
| <i>Oncorhynchus mykiss</i>               | 12834 | 27.3 | 30.2 | 26.6 | 15.9 | 53.9 | 46.1 | MN115761  |            |
| <i>Oncorhynchus mykiss</i>               | 16655 | 26.1 | 29.0 | 27.9 | 17.0 | 54.0 | 46.0 | KP013084  |            |
| <i>Oncorhynchus mykiss</i>               | 16659 | 26.2 | 28.9 | 27.9 | 17.0 | 54.0 | 46.0 | MT667254  |            |
| <i>Oncorhynchus mykiss nelsoni</i>       | 16661 | 26.1 | 29.0 | 27.9 | 17.0 | 54.1 | 45.9 | OP902891  | this study |
| <i>Oncorhynchus mykiss x Salmo salar</i> | 16658 | 26.2 | 28.9 | 27.9 | 17.0 | 54.1 | 45.9 | KP218514  |            |
| <i>Oncorhynchus mykiss x Salmo salar</i> | 16658 | 26.2 | 28.9 | 27.9 | 17.0 | 54.1 | 45.9 | NC 026537 |            |
| <i>Oncorhynchus nerka</i>                | 16659 | 26.2 | 28.9 | 27.6 | 17.3 | 53.8 | 46.2 | MG993162  |            |
| <i>Oncorhynchus nerka</i>                | 16659 | 26.2 | 28.9 | 27.6 | 17.3 | 53.8 | 46.2 | MH003639  |            |
| <i>Oncorhynchus nerka</i>                | 16659 | 26.2 | 28.9 | 27.6 | 17.3 | 53.8 | 46.2 | MH003641  |            |
| <i>Oncorhynchus nerka</i>                | 16658 | 26.2 | 28.9 | 27.6 | 17.3 | 53.8 | 46.2 | EF055889  |            |
| <i>Oncorhynchus nerka</i>                | 16658 | 26.2 | 28.9 | 27.6 | 17.3 | 53.8 | 46.2 | NC 008615 |            |
| <i>Oncorhynchus tshawytscha</i>          | 16643 | 26.2 | 28.9 | 28.2 | 16.8 | 54.3 | 45.7 | AF392054  |            |
| <i>Oncorhynchus tshawytscha</i>          | 16643 | 26.2 | 28.9 | 28.2 | 16.8 | 54.3 | 45.7 | NC 002980 |            |
| <i>Parahucho perryi</i>                  | 16652 | 26.2 | 28.8 | 28.5 | 16.5 | 54.7 | 45.3 | KJ816316  |            |
| <i>Parahucho perryi</i>                  | 16653 | 26.2 | 28.7 | 28.5 | 16.5 | 54.7 | 45.3 | KJ816315  |            |
| <i>Parahucho perryi</i>                  | 16651 | 26.2 | 28.7 | 28.5 | 16.6 | 54.7 | 45.3 | KC897653  |            |
| <i>Parahucho perryi</i>                  | 16651 | 26.2 | 28.7 | 28.5 | 16.6 | 54.7 | 45.3 | NC 021651 |            |
| <i>Prosopium cylindraceum</i>            | 16832 | 26.4 | 28.2 | 27.4 | 17.9 | 53.9 | 46.1 | MF621767  |            |
| <i>Prosopium cylindraceum</i>            | 16832 | 26.4 | 28.2 | 27.4 | 17.9 | 53.8 | 46.2 | MF621768  |            |
| <i>Prosopium cylindraceum</i>            | 16526 | 26.3 | 28.4 | 27.3 | 18.1 | 53.6 | 46.4 | JQ390062  |            |
| <i>Prosopium cylindraceum</i>            | 16526 | 26.3 | 28.4 | 27.3 | 18.1 | 53.6 | 46.4 | NC 020764 |            |
| <i>Prosopium cylindraceum</i>            | 16752 | 26.4 | 28.2 | 27.4 | 17.9 | 53.8 | 46.2 | MF621764  |            |
| <i>Prosopium cylindraceum</i>            | 16672 | 26.4 | 28.3 | 27.3 | 18.0 | 53.7 | 46.3 | MF621759  |            |
| <i>Prosopium williamsoni</i>             | 16754 | 26.4 | 28.5 | 26.7 | 18.5 | 53.0 | 47.0 | JQ390061  |            |
| <i>Prosopium williamsoni</i>             | 16754 | 26.4 | 28.5 | 26.7 | 18.5 | 53.0 | 47.0 | NC 020763 |            |
| <i>Salmo caspius</i>                     | 16677 | 26.0 | 29.5 | 27.9 | 16.7 | 53.9 | 46.1 | MT789707  |            |
| <i>Salmo caspius</i>                     | 16677 | 26.0 | 29.5 | 27.9 | 16.7 | 53.9 | 46.1 | MT789708  |            |
| <i>Salmo caspius</i>                     | 16677 | 26.0 | 29.5 | 27.9 | 16.7 | 53.9 | 46.1 | NC 058188 |            |
| <i>Salmo ischchan</i>                    | 16677 | 26.0 | 29.5 | 27.9 | 16.7 | 53.9 | 46.1 | MG551590  |            |
| <i>Salmo ischchan</i>                    | 16677 | 26.0 | 29.5 | 27.9 | 16.7 | 53.9 | 46.1 | MG599465  |            |
| <i>Salmo ischchan</i>                    | 16677 | 26.0 | 29.5 | 27.9 | 16.7 | 53.9 | 46.1 | NC 037399 |            |
| <i>Salmo ischchan</i>                    | 16677 | 26.0 | 29.5 | 27.9 | 16.7 | 53.9 | 46.1 | MG940849  |            |
| <i>Salmo ischchan</i>                    | 16677 | 26.0 | 29.4 | 27.9 | 16.7 | 53.9 | 46.1 | MG940850  |            |
| <i>Salmo ischchan</i>                    | 16676 | 26.0 | 29.4 | 27.9 | 16.7 | 53.9 | 46.1 | MG551591  |            |

|                                 |       |      |      |      |      |      |      |           |
|---------------------------------|-------|------|------|------|------|------|------|-----------|
| <i>Salmo ischchan</i>           | 16675 | 26.0 | 29.5 | 27.9 | 16.7 | 53.9 | 46.1 | MG599466  |
| <i>Salmo ischchan gegarkuni</i> | 16617 | 26.0 | 29.4 | 27.9 | 16.7 | 53.9 | 46.1 | MG551588  |
| <i>Salmo ischchan gegarkuni</i> | 16677 | 26.0 | 29.4 | 27.9 | 16.7 | 53.9 | 46.1 | MT789703  |
| <i>Salmo ischchan gegarkuni</i> | 16677 | 26.0 | 29.5 | 27.9 | 16.7 | 53.9 | 46.1 | MT789704  |
| <i>Salmo ischchan gegarkuni</i> | 16677 | 26.0 | 29.4 | 27.9 | 16.7 | 53.9 | 46.1 | MG551589  |
| <i>Salmo ischchan gegarkuni</i> | 16677 | 26.0 | 29.5 | 27.9 | 16.7 | 53.9 | 46.1 | MG940853  |
| <i>Salmo obtusirostris</i>      | 16676 | 26.0 | 29.4 | 28.0 | 16.5 | 54.0 | 46.0 | NC 037939 |
| <i>Salmo salar</i>              | 16669 | 26.3 | 29.0 | 28.4 | 16.2 | 54.7 | 45.3 | AF133701  |
| <i>Salmo salar</i>              | 16674 | 26.3 | 29.0 | 28.5 | 16.2 | 54.8 | 45.2 | JQ390055  |
| <i>Salmo salar</i>              | 16671 | 26.3 | 29.0 | 28.5 | 16.2 | 54.8 | 45.2 | JQ390056  |
| <i>Salmo salar</i>              | 16671 | 26.3 | 29.0 | 28.4 | 16.2 | 54.7 | 45.3 | KF792729  |
| <i>Salmo salar</i>              | 16665 | 26.3 | 29.0 | 28.4 | 16.2 | 54.8 | 45.2 | NC 001960 |
| <i>Salmo salar</i>              | 16665 | 26.3 | 29.0 | 28.4 | 16.2 | 54.8 | 45.2 | U12143    |
| <i>Salmo trutta</i>             | 13870 | 27.1 | 30.2 | 27.3 | 15.4 | 54.3 | 45.7 | MN115769  |
| <i>Salmo trutta</i>             | 16677 | 25.9 | 29.5 | 28.1 | 16.4 | 54.0 | 46.0 | OD909581  |
| <i>Salmo trutta</i>             | 16677 | 26.0 | 29.4 | 28.1 | 16.5 | 54.1 | 45.9 | JQ390057  |
| <i>Salmo trutta</i>             | 16677 | 26.0 | 29.4 | 28.1 | 16.5 | 54.1 | 45.9 | NC 024032 |
| <i>Salmo trutta</i>             | 16676 | 26.0 | 29.5 | 28.1 | 16.4 | 54.1 | 45.9 | MF621760  |
| <i>Salmo trutta</i>             | 16676 | 26.0 | 29.5 | 28.1 | 16.4 | 54.1 | 45.9 | MF621761  |
| <i>Salmo trutta</i>             | 16676 | 25.9 | 29.5 | 28.1 | 16.5 | 54.0 | 46.0 | MF621762  |
| <i>Salmo trutta</i>             | 16676 | 26.0 | 29.5 | 28.1 | 16.4 | 54.1 | 45.9 | MF621763  |
| <i>Salmo trutta fario</i>       | 16677 | 26.0 | 29.5 | 27.9 | 16.7 | 53.9 | 46.1 | MT789706  |
| <i>Salmo trutta fario</i>       | 16677 | 26.0 | 29.5 | 28.1 | 16.4 | 54.1 | 45.9 | KT633607  |
| <i>Salmo trutta fario</i>       | 16687 | 27.9 | 16.6 | 26.0 | 29.5 | 53.9 | 46.1 | KP171723  |
| <i>Salmo trutta fario</i>       | 16684 | 25.9 | 29.5 | 28.1 | 16.5 | 54.0 | 46.0 | KT634053  |
| <i>Salmo trutta fario</i>       | 16677 | 25.9 | 29.5 | 27.9 | 16.6 | 53.9 | 46.1 | MT789705  |
| <i>Salmo trutta trutta</i>      | 16677 | 26.0 | 29.5 | 28.1 | 16.5 | 54.0 | 46.0 | NC 010007 |
| <i>Salvelinus albus</i>         | 16653 | 26.5 | 28.6 | 28.0 | 17.0 | 54.5 | 45.5 | NC 028018 |
| <i>Salvelinus albus</i>         | 16653 | 26.5 | 28.6 | 28.0 | 17.0 | 54.5 | 45.5 | KT266871  |
| <i>Salvelinus albus</i>         | 16653 | 26.5 | 28.6 | 28.0 | 17.0 | 54.5 | 45.5 | KT266870  |
| <i>Salvelinus alpinus</i>       | 16655 | 26.5 | 28.6 | 28.0 | 17.0 | 54.5 | 45.5 | MT880638  |
| <i>Salvelinus alpinus</i>       | 16655 | 26.5 | 28.6 | 28.0 | 17.0 | 54.5 | 45.5 | MT880631  |
| <i>Salvelinus alpinus</i>       | 16656 | 26.5 | 28.6 | 28.0 | 17.0 | 54.4 | 45.6 | MT880632  |
| <i>Salvelinus alpinus</i>       | 16657 | 26.5 | 28.6 | 28.0 | 17.0 | 54.5 | 45.5 | MT880633  |
| <i>Salvelinus alpinus</i>       | 16652 | 26.4 | 28.6 | 28.0 | 17.0 | 54.4 | 45.6 | MT880635  |
| <i>Salvelinus alpinus</i>       | 16655 | 26.5 | 28.6 | 28.0 | 17.0 | 54.5 | 45.5 | MT880720  |
| <i>Salvelinus alpinus</i>       | 16655 | 26.5 | 28.6 | 28.0 | 17.0 | 54.5 | 45.5 | MT880721  |
| <i>Salvelinus alpinus</i>       | 16653 | 26.4 | 28.6 | 28.0 | 17.0 | 54.4 | 45.6 | MT880650  |
| <i>Salvelinus alpinus</i>       | 16653 | 26.4 | 28.6 | 28.0 | 17.0 | 54.4 | 45.6 | MT880652  |
| <i>Salvelinus alpinus</i>       | 16652 | 26.4 | 28.6 | 28.0 | 17.0 | 54.4 | 45.6 | MT880654  |
| <i>Salvelinus alpinus</i>       | 16653 | 26.4 | 28.6 | 28.0 | 17.0 | 54.4 | 45.6 | MT880655  |
| <i>Salvelinus alpinus</i>       | 16652 | 26.4 | 28.6 | 28.0 | 17.0 | 54.4 | 45.6 | MT880656  |
| <i>Salvelinus alpinus</i>       | 16653 | 26.4 | 28.6 | 28.0 | 17.0 | 54.4 | 45.6 | MT880657  |



|                           |       |      |      |      |      |      |      |           |
|---------------------------|-------|------|------|------|------|------|------|-----------|
| <i>Salvelinus alpinus</i> | 16653 | 26.4 | 28.6 | 28.0 | 17.0 | 54.4 | 45.6 | MT880658  |
| <i>Salvelinus alpinus</i> | 16655 | 26.4 | 28.6 | 28.0 | 17.0 | 54.4 | 45.6 | MT880662  |
| <i>Salvelinus alpinus</i> | 16655 | 26.4 | 28.6 | 28.0 | 17.0 | 54.4 | 45.6 | MT880660  |
| <i>Salvelinus alpinus</i> | 16655 | 26.4 | 28.6 | 28.0 | 17.0 | 54.4 | 45.6 | MT880661  |
| <i>Salvelinus alpinus</i> | 16652 | 26.4 | 28.6 | 28.0 | 17.0 | 54.3 | 45.7 | MT880648  |
| <i>Salvelinus alpinus</i> | 16652 | 26.4 | 28.6 | 28.0 | 17.0 | 54.4 | 45.6 | MT880649  |
| <i>Salvelinus alpinus</i> | 16652 | 26.4 | 28.6 | 28.0 | 17.0 | 54.3 | 45.7 | MT880641  |
| <i>Salvelinus alpinus</i> | 16652 | 26.4 | 28.6 | 28.0 | 17.0 | 54.4 | 45.6 | MT880642  |
| <i>Salvelinus alpinus</i> | 16652 | 26.4 | 28.6 | 28.0 | 17.0 | 54.4 | 45.6 | MT880643  |
| <i>Salvelinus alpinus</i> | 16652 | 26.4 | 28.6 | 28.0 | 17.0 | 54.4 | 45.6 | MT880644  |
| <i>Salvelinus alpinus</i> | 16652 | 26.4 | 28.6 | 28.0 | 17.0 | 54.3 | 45.7 | MT880645  |
| <i>Salvelinus alpinus</i> | 16652 | 26.4 | 28.6 | 28.0 | 17.0 | 54.3 | 45.7 | MT880646  |
| <i>Salvelinus alpinus</i> | 16652 | 26.4 | 28.6 | 28.0 | 17.0 | 54.4 | 45.6 | MT880669  |
| <i>Salvelinus alpinus</i> | 16652 | 26.4 | 28.6 | 28.0 | 17.0 | 54.4 | 45.6 | MT880675  |
| <i>Salvelinus alpinus</i> | 16652 | 26.4 | 28.6 | 28.0 | 17.0 | 54.4 | 45.6 | MT880676  |
| <i>Salvelinus alpinus</i> | 16652 | 26.4 | 28.6 | 28.0 | 17.0 | 54.4 | 45.6 | MT880673  |
| <i>Salvelinus alpinus</i> | 16652 | 26.4 | 28.6 | 28.0 | 17.0 | 54.4 | 45.6 | MT880674  |
| <i>Salvelinus alpinus</i> | 16652 | 26.4 | 28.6 | 28.0 | 17.0 | 54.4 | 45.6 | MT880689  |
| <i>Salvelinus alpinus</i> | 16652 | 26.4 | 28.6 | 28.0 | 17.0 | 54.4 | 45.6 | MT880690  |
| <i>Salvelinus alpinus</i> | 16655 | 26.4 | 28.6 | 28.0 | 17.0 | 54.5 | 45.5 | MT880691  |
| <i>Salvelinus alpinus</i> | 16652 | 26.4 | 28.6 | 28.0 | 17.0 | 54.4 | 45.6 | MT880692  |
| <i>Salvelinus alpinus</i> | 16655 | 26.4 | 28.6 | 28.0 | 17.0 | 54.4 | 45.6 | MT880710  |
| <i>Salvelinus alpinus</i> | 16655 | 26.4 | 28.6 | 28.0 | 16.9 | 54.5 | 45.5 | MT880711  |
| <i>Salvelinus alpinus</i> | 16655 | 26.4 | 28.6 | 28.0 | 17.0 | 54.4 | 45.6 | MT880714  |
| <i>Salvelinus alpinus</i> | 16655 | 26.4 | 28.6 | 28.0 | 16.9 | 54.5 | 45.5 | MT880708  |
| <i>Salvelinus alpinus</i> | 16652 | 26.4 | 28.6 | 28.0 | 17.0 | 54.4 | 45.6 | MT880679  |
| <i>Salvelinus alpinus</i> | 16652 | 26.4 | 28.6 | 28.0 | 17.0 | 54.4 | 45.6 | MT880688  |
| <i>Salvelinus alpinus</i> | 16655 | 26.4 | 28.6 | 28.0 | 17.0 | 54.4 | 45.6 | MT880680  |
| <i>Salvelinus alpinus</i> | 16652 | 26.4 | 28.6 | 28.0 | 17.0 | 54.4 | 45.6 | MT880683  |
| <i>Salvelinus alpinus</i> | 16656 | 26.5 | 28.6 | 28.0 | 17.0 | 54.5 | 45.5 | MT880685  |
| <i>Salvelinus alpinus</i> | 16652 | 26.4 | 28.6 | 28.0 | 17.0 | 54.4 | 45.6 | MT880699  |
| <i>Salvelinus alpinus</i> | 16652 | 26.4 | 28.6 | 28.0 | 17.0 | 54.4 | 45.6 | MT880700  |
| <i>Salvelinus alpinus</i> | 16652 | 26.4 | 28.6 | 28.0 | 17.0 | 54.4 | 45.6 | MT880702  |
| <i>Salvelinus alpinus</i> | 16652 | 26.4 | 28.6 | 28.0 | 17.0 | 54.4 | 45.6 | MT880703  |
| <i>Salvelinus alpinus</i> | 16652 | 26.4 | 28.6 | 28.0 | 17.0 | 54.4 | 45.6 | MT880705  |
| <i>Salvelinus alpinus</i> | 16659 | 26.5 | 28.5 | 28.1 | 16.9 | 54.5 | 45.5 | NC 000861 |
| <i>Salvelinus alpinus</i> | 16650 | 26.4 | 28.6 | 28.0 | 17.0 | 54.4 | 45.6 | MF621740  |
| <i>Salvelinus alpinus</i> | 16655 | 26.5 | 28.6 | 28.0 | 17.0 | 54.4 | 45.6 | MT880636  |
| <i>Salvelinus alpinus</i> | 16652 | 26.4 | 28.6 | 28.0 | 17.0 | 54.4 | 45.6 | MT880637  |
| <i>Salvelinus alpinus</i> | 16652 | 26.4 | 28.6 | 28.0 | 17.0 | 54.3 | 45.7 | MT880639  |
| <i>Salvelinus alpinus</i> | 16656 | 26.5 | 28.6 | 28.0 | 17.0 | 54.4 | 45.6 | MT880634  |
| <i>Salvelinus alpinus</i> | 16655 | 26.4 | 28.6 | 28.0 | 17.0 | 54.5 | 45.5 | MT880716  |
| <i>Salvelinus alpinus</i> | 16655 | 26.5 | 28.6 | 28.0 | 17.0 | 54.5 | 45.5 | MT880717  |

|                           |       |      |      |      |      |      |      |          |
|---------------------------|-------|------|------|------|------|------|------|----------|
| <i>Salvelinus alpinus</i> | 16655 | 26.5 | 28.6 | 28.0 | 17.0 | 54.5 | 45.5 | MT880718 |
| <i>Salvelinus alpinus</i> | 16655 | 26.5 | 28.6 | 28.0 | 17.0 | 54.5 | 45.5 | MT880719 |
| <i>Salvelinus alpinus</i> | 16655 | 26.4 | 28.6 | 28.0 | 17.0 | 54.5 | 45.5 | MT880722 |
| <i>Salvelinus alpinus</i> | 16655 | 26.4 | 28.6 | 28.0 | 17.0 | 54.5 | 45.5 | MT880723 |
| <i>Salvelinus alpinus</i> | 16655 | 26.4 | 28.6 | 28.0 | 17.0 | 54.5 | 45.5 | MT880724 |
| <i>Salvelinus alpinus</i> | 16655 | 26.5 | 28.6 | 28.0 | 17.0 | 54.5 | 45.5 | MT880659 |
| <i>Salvelinus alpinus</i> | 16655 | 26.5 | 28.6 | 28.0 | 17.0 | 54.5 | 45.5 | MT880651 |
| <i>Salvelinus alpinus</i> | 16653 | 26.4 | 28.6 | 28.0 | 17.0 | 54.4 | 45.6 | MT880653 |
| <i>Salvelinus alpinus</i> | 16655 | 26.4 | 28.6 | 28.0 | 17.0 | 54.4 | 45.6 | MT880663 |
| <i>Salvelinus alpinus</i> | 16655 | 26.4 | 28.6 | 28.0 | 17.0 | 54.4 | 45.6 | MT880664 |
| <i>Salvelinus alpinus</i> | 16655 | 26.4 | 28.6 | 28.0 | 17.0 | 54.4 | 45.6 | MT880665 |
| <i>Salvelinus alpinus</i> | 16655 | 26.4 | 28.6 | 28.0 | 17.0 | 54.5 | 45.5 | MT880666 |
| <i>Salvelinus alpinus</i> | 16655 | 26.4 | 28.6 | 28.0 | 17.0 | 54.4 | 45.6 | MT880667 |
| <i>Salvelinus alpinus</i> | 16655 | 26.4 | 28.6 | 28.0 | 17.0 | 54.4 | 45.6 | MT880668 |
| <i>Salvelinus alpinus</i> | 16652 | 26.4 | 28.6 | 28.0 | 17.0 | 54.4 | 45.6 | MT880640 |
| <i>Salvelinus alpinus</i> | 16652 | 26.4 | 28.6 | 28.0 | 17.0 | 54.4 | 45.6 | MT880647 |
| <i>Salvelinus alpinus</i> | 16652 | 26.4 | 28.6 | 28.0 | 17.0 | 54.4 | 45.6 | MT880677 |
| <i>Salvelinus alpinus</i> | 16652 | 26.4 | 28.6 | 28.0 | 17.0 | 54.4 | 45.6 | MT880678 |
| <i>Salvelinus alpinus</i> | 16652 | 26.4 | 28.6 | 28.0 | 17.0 | 54.3 | 45.7 | MT880670 |
| <i>Salvelinus alpinus</i> | 16652 | 26.4 | 28.6 | 28.0 | 17.0 | 54.3 | 45.7 | MT880671 |
| <i>Salvelinus alpinus</i> | 16652 | 26.4 | 28.6 | 28.0 | 17.0 | 54.4 | 45.6 | MT880672 |
| <i>Salvelinus alpinus</i> | 16652 | 26.4 | 28.6 | 28.0 | 17.0 | 54.4 | 45.6 | MT880695 |
| <i>Salvelinus alpinus</i> | 16652 | 26.4 | 28.6 | 28.0 | 17.0 | 54.4 | 45.6 | MT880696 |
| <i>Salvelinus alpinus</i> | 16652 | 26.4 | 28.6 | 28.0 | 17.0 | 54.4 | 45.6 | MT880697 |
| <i>Salvelinus alpinus</i> | 16656 | 26.4 | 28.6 | 28.0 | 17.0 | 54.4 | 45.6 | MT880693 |
| <i>Salvelinus alpinus</i> | 16652 | 26.4 | 28.6 | 28.0 | 17.0 | 54.4 | 45.6 | MT880694 |
| <i>Salvelinus alpinus</i> | 16655 | 26.4 | 28.6 | 28.0 | 16.9 | 54.5 | 45.5 | MT880712 |
| <i>Salvelinus alpinus</i> | 16655 | 26.4 | 28.6 | 28.0 | 17.0 | 54.5 | 45.5 | MT880713 |
| <i>Salvelinus alpinus</i> | 16655 | 26.4 | 28.6 | 28.0 | 16.9 | 54.5 | 45.5 | MT880715 |
| <i>Salvelinus alpinus</i> | 16653 | 26.4 | 28.6 | 28.0 | 17.0 | 54.5 | 45.5 | MT880709 |
| <i>Salvelinus alpinus</i> | 16655 | 26.4 | 28.6 | 28.0 | 17.0 | 54.5 | 45.5 | MT880681 |
| <i>Salvelinus alpinus</i> | 16656 | 26.5 | 28.6 | 28.0 | 17.0 | 54.4 | 45.6 | MT880682 |
| <i>Salvelinus alpinus</i> | 16658 | 26.5 | 28.6 | 28.0 | 17.0 | 54.4 | 45.6 | MT880684 |
| <i>Salvelinus alpinus</i> | 16652 | 26.4 | 28.6 | 28.0 | 17.0 | 54.4 | 45.6 | MT880686 |
| <i>Salvelinus alpinus</i> | 16652 | 26.4 | 28.6 | 28.0 | 17.0 | 54.4 | 45.6 | MT880687 |
| <i>Salvelinus alpinus</i> | 16652 | 26.4 | 28.6 | 28.0 | 17.0 | 54.4 | 45.6 | MT880698 |
| <i>Salvelinus alpinus</i> | 16652 | 26.4 | 28.6 | 28.0 | 17.0 | 54.4 | 45.6 | MT880707 |
| <i>Salvelinus alpinus</i> | 16652 | 26.4 | 28.6 | 28.0 | 17.0 | 54.4 | 45.6 | MT880701 |
| <i>Salvelinus alpinus</i> | 16652 | 26.4 | 28.6 | 28.0 | 17.0 | 54.4 | 45.6 | MT880704 |
| <i>Salvelinus alpinus</i> | 16652 | 26.4 | 28.6 | 28.0 | 17.0 | 54.3 | 45.7 | MT880706 |
| <i>Salvelinus alpinus</i> | 16659 | 26.5 | 28.5 | 28.1 | 16.9 | 54.5 | 45.5 | AF154851 |
| <i>Salvelinus alpinus</i> | 16652 | 26.4 | 28.6 | 28.0 | 17.0 | 54.3 | 45.7 | MF621741 |
| <i>Salvelinus alpinus</i> | 16653 | 26.5 | 28.6 | 28.0 | 16.9 | 54.5 | 45.5 | MF621743 |

|                                                        |       |      |      |      |      |      |      |           |
|--------------------------------------------------------|-------|------|------|------|------|------|------|-----------|
| <i>Salvelinus alpinus</i>                              | 16652 | 26.4 | 28.6 | 28.0 | 17.0 | 54.4 | 45.6 | MN530963  |
| <i>Salvelinus alpinus</i>                              | 16652 | 26.4 | 28.6 | 28.0 | 17.0 | 54.4 | 45.6 | MN530962  |
| <i>Salvelinus alpinus alpinus</i>                      | 16655 | 26.5 | 28.5 | 28.0 | 17.0 | 54.5 | 45.5 | MN957796  |
| <i>Salvelinus alpinus alpinus</i>                      | 16657 | 26.4 | 28.6 | 28.0 | 17.0 | 54.4 | 45.6 | MN957795  |
| <i>Salvelinus alpinus alpinus</i>                      | 16655 | 26.4 | 28.6 | 28.0 | 17.0 | 54.4 | 45.6 | MN957797  |
| <i>Salvelinus alpinus erythrinus</i>                   | 16652 | 26.4 | 28.6 | 28.0 | 17.0 | 54.4 | 45.6 | MW664921  |
| <i>Salvelinus alpinus erythrinus</i>                   | 16652 | 26.4 | 28.6 | 28.0 | 17.0 | 54.4 | 45.6 | MW664922  |
| <i>Salvelinus boganidae</i>                            | 16655 | 26.4 | 28.6 | 28.0 | 17.0 | 54.4 | 45.6 | NC 046706 |
| <i>Salvelinus boganidae</i>                            | 16655 | 26.4 | 28.6 | 28.0 | 17.0 | 54.4 | 45.6 | MK695623  |
| <i>Salvelinus curilus</i>                              | 16654 | 26.4 | 28.6 | 28.0 | 17.0 | 54.4 | 45.6 | KJ746619  |
| <i>Salvelinus curilus</i>                              | 16654 | 26.4 | 28.6 | 28.0 | 17.0 | 54.4 | 45.6 | NC 024585 |
| <i>Salvelinus elgyticus</i>                            | 16654 | 26.3 | 28.6 | 27.9 | 17.1 | 54.2 | 45.8 | MK695624  |
| <i>Salvelinus elgyticus</i>                            | 16654 | 26.3 | 28.6 | 27.9 | 17.1 | 54.2 | 45.8 | NC 046707 |
| <i>Salvelinus elgyticus</i>                            | 16654 | 26.3 | 28.7 | 27.9 | 17.1 | 54.2 | 45.8 | MK695625  |
| <i>Salvelinus fontinalis</i>                           | 16624 | 26.6 | 28.3 | 28.2 | 16.9 | 54.8 | 45.2 | AF154850  |
| <i>Salvelinus fontinalis</i>                           | 16624 | 26.6 | 28.3 | 28.2 | 16.9 | 54.8 | 45.2 | NC 000860 |
| <i>Salvelinus fontinalis</i>                           | 16623 | 26.6 | 28.3 | 28.2 | 16.9 | 54.7 | 45.3 | MF621737  |
| <i>Salvelinus fontinalis</i>                           | 16623 | 26.6 | 28.3 | 28.2 | 16.9 | 54.8 | 45.2 | MF621739  |
| <i>Salvelinus fontinalis</i>                           | 16623 | 26.6 | 28.3 | 28.2 | 16.9 | 54.8 | 45.2 | MF621738  |
| <i>Salvelinus fontinalis</i> x <i>Salvelinus malma</i> | 16622 | 26.5 | 28.4 | 28.3 | 16.8 | 54.8 | 45.2 | MK270623  |
| <i>Salvelinus fontinalis</i> x <i>Salvelinus malma</i> | 16622 | 26.5 | 28.4 | 28.3 | 16.8 | 54.8 | 45.2 | NC 042195 |
| <i>Salvelinus kuznetzovi</i>                           | 16654 | 26.4 | 28.6 | 28.0 | 17.0 | 54.5 | 45.5 | KU674352  |
| <i>Salvelinus kuznetzovi</i>                           | 16654 | 26.4 | 28.6 | 28.0 | 17.0 | 54.5 | 45.5 | KU674351  |
| <i>Salvelinus kuznetzovi</i>                           | 16654 | 26.4 | 28.6 | 28.0 | 17.0 | 54.5 | 45.5 | NC 029877 |
| <i>Salvelinus leucomaenis</i>                          | 16655 | 26.3 | 28.6 | 28.1 | 17.0 | 54.4 | 45.6 | KF974451  |
| <i>Salvelinus leucomaenis</i>                          | 16658 | 26.5 | 28.4 | 28.2 | 16.9 | 54.7 | 45.3 | KF513161  |
| <i>Salvelinus leucomaenis</i>                          | 16655 | 26.3 | 28.6 | 28.0 | 17.1 | 54.3 | 45.7 | KF974452  |
| <i>Salvelinus leucomaenis</i>                          | 16655 | 26.3 | 28.6 | 28.1 | 17.0 | 54.4 | 45.6 | MN972433  |
| <i>Salvelinus leucomaenis</i>                          | 16655 | 26.3 | 28.6 | 28.1 | 17.0 | 54.4 | 45.6 | MN972434  |
| <i>Salvelinus leucomaenis</i>                          | 16655 | 26.3 | 28.6 | 28.1 | 17.0 | 54.4 | 45.6 | MN972435  |
| <i>Salvelinus leucomaenis</i>                          | 16658 | 26.5 | 28.4 | 28.2 | 16.9 | 54.7 | 45.3 | NC 022844 |
| <i>Salvelinus levanidovi</i>                           | 16624 | 26.4 | 28.6 | 28.1 | 16.9 | 54.5 | 45.5 | MK695626  |
| <i>Salvelinus levanidovi</i>                           | 16624 | 26.4 | 28.6 | 28.1 | 16.9 | 54.5 | 45.5 | NC 046708 |
| <i>Salvelinus malma</i>                                | 16652 | 26.5 | 28.5 | 28.0 | 17.0 | 54.5 | 45.5 | MN530959  |
| <i>Salvelinus malma</i>                                | 16654 | 26.5 | 28.6 | 28.0 | 16.9 | 54.5 | 45.5 | KJ746618  |
| <i>Salvelinus malma</i>                                | 16652 | 26.4 | 28.5 | 28.1 | 17.0 | 54.5 | 45.5 | MF680544  |
| <i>Salvelinus malma</i>                                | 16652 | 26.4 | 28.5 | 28.1 | 17.0 | 54.5 | 45.5 | NC 037502 |
| <i>Salvelinus malma</i>                                | 16652 | 26.5 | 28.5 | 28.0 | 17.0 | 54.5 | 45.5 | MN530961  |
| <i>Salvelinus malma</i>                                | 16652 | 26.5 | 28.5 | 28.0 | 17.0 | 54.5 | 45.5 | MN530960  |
| <i>Salvelinus namaycush</i>                            | 16654 | 26.2 | 28.8 | 27.8 | 17.2 | 54.0 | 46.0 | CM028292  |
| <i>Salvelinus namaycush</i>                            | 16654 | 26.2 | 28.9 | 27.7 | 17.2 | 53.9 | 46.1 | MF621745  |
| <i>Salvelinus namaycush</i>                            | 16655 | 26.2 | 28.9 | 27.8 | 17.2 | 53.9 | 46.1 | MF621747  |
| <i>Salvelinus namaycush</i>                            | 16653 | 26.2 | 28.8 | 27.8 | 17.1 | 54.0 | 46.0 | MF621742  |

|                               |       |      |      |      |      |      |      |           |
|-------------------------------|-------|------|------|------|------|------|------|-----------|
| <i>Salvelinus namaycush</i>   | 16653 | 26.2 | 28.8 | 27.8 | 17.1 | 54.0 | 46.0 | NC 036392 |
| <i>Salvelinus namaycush</i>   | 16655 | 26.2 | 28.8 | 27.8 | 17.2 | 54.0 | 46.0 | MF621748  |
| <i>Salvelinus namaycush</i>   | 16654 | 26.2 | 28.9 | 27.7 | 17.2 | 53.9 | 46.1 | MF621744  |
| <i>Salvelinus namaycush</i>   | 16654 | 26.2 | 28.8 | 27.8 | 17.2 | 54.0 | 46.0 | MF621746  |
| <i>Salvelinus schmidtii</i>   | 16653 | 26.5 | 28.6 | 28.1 | 16.9 | 54.5 | 45.5 | MW664923  |
| <i>Salvelinus schmidtii</i>   | 16653 | 26.5 | 28.6 | 28.1 | 16.9 | 54.5 | 45.5 | NC 059927 |
| <i>Salvelinus schmidtii</i>   | 16655 | 26.5 | 28.6 | 28.1 | 16.9 | 54.5 | 45.5 | MW664924  |
| <i>Salvelinus sp.</i>         | 16654 | 26.4 | 28.6 | 28.0 | 17.0 | 54.4 | 45.6 | MW181766  |
| <i>Salvelinus sp.</i>         | 16654 | 26.4 | 28.6 | 28.0 | 17.0 | 54.4 | 45.6 | MW181767  |
| <i>Salvelinus sp.</i>         | 16654 | 26.4 | 28.6 | 28.0 | 17.0 | 54.4 | 45.6 | MW181768  |
| <i>Salvelinus taranetzi</i>   | 16654 | 26.4 | 28.6 | 28.0 | 17.0 | 54.4 | 45.6 | MK695630  |
| <i>Salvelinus taranetzi</i>   | 16654 | 26.4 | 28.6 | 28.0 | 17.0 | 54.4 | 45.6 | NC 046710 |
| <i>Salvelinus taranetzi</i>   | 16654 | 26.4 | 28.6 | 28.0 | 17.0 | 54.3 | 45.7 | MK695631  |
| <i>Salvelinus svetovidovi</i> | 16655 | 26.4 | 28.7 | 28.0 | 16.9 | 54.4 | 45.6 | NC 046709 |
| <i>Salvelinus svetovidovi</i> | 16655 | 26.4 | 28.7 | 28.0 | 16.9 | 54.4 | 45.6 | MK695628  |
| <i>Salvelinus svetovidovi</i> | 16655 | 26.4 | 28.7 | 28.0 | 16.9 | 54.4 | 45.6 | MK695629  |
| <i>Salvelinus svetovidovi</i> | 16655 | 26.4 | 28.7 | 28.0 | 16.9 | 54.4 | 45.6 | MK695627  |
| <i>Stenodus leucichthys</i>   | 16864 | 25.8 | 29.3 | 27.0 | 17.9 | 52.8 | 47.2 | JQ390059  |
| <i>Stenodus leucichthys</i>   | 16864 | 25.8 | 29.3 | 27.0 | 17.9 | 52.8 | 47.2 | NC 020761 |
| <i>Thymallus aeliani</i>      | 16657 | 27.1 | 27.5 | 27.9 | 17.6 | 54.9 | 45.1 | MT063008  |
| <i>Thymallus aeliani</i>      | 16657 | 27.1 | 27.5 | 27.9 | 17.6 | 54.9 | 45.1 | NC 056304 |
| <i>Thymallus aeliani</i>      | 16657 | 27.1 | 27.5 | 27.9 | 17.6 | 54.9 | 45.1 | MT063009  |
| <i>Thymallus arcticus</i>     | 16662 | 27.6 | 27.1 | 28.3 | 17.0 | 55.9 | 44.1 | MT063015  |
| <i>Thymallus arcticus</i>     | 16662 | 27.6 | 27.1 | 28.3 | 17.0 | 55.9 | 44.1 | MT063017  |
| <i>Thymallus arcticus</i>     | 16662 | 27.4 | 27.2 | 28.2 | 17.2 | 55.6 | 44.4 | MT063011  |
| <i>Thymallus arcticus</i>     | 16662 | 27.4 | 27.2 | 28.2 | 17.2 | 55.6 | 44.4 | MT063014  |
| <i>Thymallus arcticus</i>     | 16661 | 27.5 | 27.2 | 28.2 | 17.1 | 55.7 | 44.3 | MF621754  |
| <i>Thymallus arcticus</i>     | 16661 | 27.5 | 27.2 | 28.2 | 17.1 | 55.7 | 44.3 | MF621755  |
| <i>Thymallus arcticus</i>     | 16661 | 27.5 | 27.2 | 28.2 | 17.1 | 55.7 | 44.3 | MF621758  |
| <i>Thymallus arcticus</i>     | 16655 | 27.2 | 27.5 | 27.9 | 17.4 | 55.1 | 44.9 | KJ866481  |
| <i>Thymallus arcticus</i>     | 16660 | 27.4 | 27.3 | 28.1 | 17.2 | 55.5 | 44.5 | MT063013  |
| <i>Thymallus arcticus</i>     | 16662 | 27.6 | 27.1 | 28.3 | 17.0 | 55.9 | 44.1 | MT063016  |
| <i>Thymallus arcticus</i>     | 16663 | 27.5 | 27.2 | 28.3 | 17.1 | 55.7 | 44.3 | MT063012  |
| <i>Thymallus arcticus</i>     | 16660 | 27.5 | 27.2 | 28.2 | 17.1 | 55.7 | 44.3 | MT063010  |
| <i>Thymallus arcticus</i>     | 16660 | 27.5 | 27.2 | 28.2 | 17.1 | 55.7 | 44.3 | NC 056305 |
| <i>Thymallus arcticus</i>     | 16644 | 27.5 | 27.2 | 28.2 | 17.2 | 55.6 | 44.4 | FJ872559  |
| <i>Thymallus arcticus</i>     | 16661 | 27.5 | 27.2 | 28.2 | 17.1 | 55.7 | 44.3 | MF621752  |
| <i>Thymallus arcticus</i>     | 16661 | 27.5 | 27.2 | 28.2 | 17.1 | 55.8 | 44.2 | MF621753  |
| <i>Thymallus arcticus</i>     | 16661 | 27.5 | 27.1 | 28.2 | 17.1 | 55.8 | 44.2 | MF621756  |
| <i>Thymallus arcticus</i>     | 16661 | 27.5 | 27.2 | 28.2 | 17.1 | 55.7 | 44.3 | MF621757  |
| <i>Thymallus baicalensis</i>  | 16661 | 27.2 | 27.5 | 28.2 | 17.1 | 55.4 | 44.6 | MT063024  |
| <i>Thymallus baicalensis</i>  | 16662 | 27.2 | 27.5 | 28.2 | 17.1 | 55.4 | 44.6 | MT063022  |
| <i>Thymallus baicalensis</i>  | 16662 | 27.2 | 27.5 | 28.2 | 17.1 | 55.4 | 44.6 | NC 056306 |

|                                        |       |      |      |      |      |      |      |           |
|----------------------------------------|-------|------|------|------|------|------|------|-----------|
| <i>Thymallus baicalensis</i>           | 16661 | 27.2 | 27.5 | 28.2 | 17.1 | 55.4 | 44.6 | MT063027  |
| <i>Thymallus baicalensis</i>           | 16659 | 27.3 | 27.5 | 28.2 | 17.1 | 55.5 | 44.5 | MT063026  |
| <i>Thymallus baicalensis</i>           | 16661 | 27.2 | 27.5 | 28.2 | 17.1 | 55.4 | 44.6 | MT063023  |
| <i>Thymallus baicalensis</i>           | 16661 | 27.2 | 27.5 | 28.2 | 17.1 | 55.4 | 44.6 | MT063025  |
| <i>Thymallus baicalolenensis</i>       | 16661 | 27.5 | 27.3 | 28.0 | 17.2 | 55.5 | 44.5 | MT063021  |
| <i>Thymallus baicalolenensis</i>       | 16662 | 27.5 | 27.3 | 28.0 | 17.2 | 55.4 | 44.6 | KY078221  |
| <i>Thymallus baicalolenensis</i>       | 16661 | 27.5 | 27.3 | 28.0 | 17.2 | 55.4 | 44.6 | MT063018  |
| <i>Thymallus baicalolenensis</i>       | 16662 | 27.5 | 27.3 | 28.0 | 17.2 | 55.4 | 44.6 | NC 034294 |
| <i>Thymallus baicalolenensis</i>       | 16661 | 27.5 | 27.3 | 28.0 | 17.3 | 55.4 | 44.6 | MT063019  |
| <i>Thymallus baicalolenensis</i>       | 16662 | 27.5 | 27.3 | 28.0 | 17.2 | 55.5 | 44.5 | MT063020  |
| <i>Thymallus baicalolenensis</i>       | 16663 | 27.5 | 27.3 | 28.0 | 17.2 | 55.5 | 44.5 | KJ866482  |
| <i>Thymallus brevicephalus</i>         | 16655 | 27.2 | 27.5 | 28.0 | 17.4 | 55.2 | 44.8 | MT063034  |
| <i>Thymallus brevicephalus</i>         | 16655 | 27.2 | 27.5 | 28.0 | 17.4 | 55.2 | 44.8 | NC 056310 |
| <i>Thymallus brevicephalus</i>         | 16657 | 27.2 | 27.5 | 28.0 | 17.4 | 55.1 | 44.9 | MT063035  |
| <i>Thymallus brevicephalus</i>         | 16657 | 27.1 | 27.5 | 28.0 | 17.4 | 55.1 | 44.9 | MT063036  |
| <i>Thymallus brevirostris</i>          | 16658 | 27.1 | 27.5 | 28.0 | 17.3 | 55.1 | 44.9 | MT063033  |
| <i>Thymallus brevirostris</i>          | 16658 | 27.1 | 27.5 | 27.9 | 17.4 | 55.0 | 45.0 | KJ866486  |
| <i>Thymallus brevirostris</i>          | 16658 | 27.1 | 27.5 | 27.9 | 17.4 | 55.0 | 45.0 | NC 027412 |
| <i>Thymallus brevirostris</i>          | 16653 | 27.1 | 27.5 | 28.0 | 17.4 | 55.1 | 44.9 | MH027384  |
| <i>Thymallus burejensis</i>            | 16663 | 27.4 | 27.3 | 28.2 | 17.1 | 55.6 | 44.4 | MT063037  |
| <i>Thymallus burejensis</i>            | 16664 | 27.0 | 27.6 | 27.9 | 17.5 | 54.9 | 45.1 | NC 027411 |
| <i>Thymallus burejensis</i>            | 16663 | 27.4 | 27.3 | 28.2 | 17.1 | 55.6 | 44.4 | KY078220  |
| <i>Thymallus burejensis</i>            | 16664 | 27.0 | 27.6 | 27.9 | 17.5 | 54.9 | 45.1 | KJ866485  |
| <i>Thymallus grubii</i>                | 16660 | 27.1 | 27.6 | 27.9 | 17.4 | 55.1 | 44.9 | KY078219  |
| <i>Thymallus grubii</i>                | 16660 | 27.1 | 27.6 | 27.9 | 17.4 | 55.1 | 44.9 | MT063038  |
| <i>Thymallus grubii</i>                | 16662 | 27.1 | 27.6 | 28.0 | 17.4 | 55.0 | 45.0 | KF649073  |
| <i>Thymallus grubii</i>                | 16657 | 27.2 | 27.5 | 27.9 | 17.4 | 55.1 | 44.9 | KF692113  |
| <i>Thymallus grubii</i>                | 16662 | 27.1 | 27.6 | 28.0 | 17.4 | 55.0 | 45.0 | NC 022925 |
| <i>Thymallus grubii flavomaculatus</i> | 16659 | 27.1 | 27.5 | 27.9 | 17.4 | 55.0 | 45.0 | KU674353  |
| <i>Thymallus grubii flavomaculatus</i> | 16660 | 27.2 | 27.5 | 27.9 | 17.4 | 55.1 | 44.9 | KY078215  |
| <i>Thymallus grubii flavomaculatus</i> | 16659 | 27.1 | 27.5 | 27.9 | 17.5 | 55.0 | 45.0 | KY078216  |
| <i>Thymallus grubii flavomaculatus</i> | 16660 | 27.2 | 27.5 | 27.9 | 17.4 | 55.1 | 44.9 | MT063039  |
| <i>Thymallus grubii flavomaculatus</i> | 16659 | 27.1 | 27.5 | 27.9 | 17.5 | 55.0 | 45.0 | KU674354  |
| <i>Thymallus ligericus</i>             | 16656 | 27.2 | 27.4 | 28.1 | 17.3 | 55.3 | 44.7 | MT063046  |
| <i>Thymallus ligericus</i>             | 16656 | 27.2 | 27.4 | 28.1 | 17.3 | 55.3 | 44.7 | MT063053  |
| <i>Thymallus ligericus</i>             | 16657 | 27.2 | 27.4 | 28.1 | 17.3 | 55.3 | 44.7 | MT063007  |
| <i>Thymallus ligericus</i>             | 16657 | 27.2 | 27.4 | 28.1 | 17.3 | 55.3 | 44.7 | NC 056303 |
| <i>Thymallus ligericus</i>             | 16657 | 27.2 | 27.4 | 28.1 | 17.3 | 55.3 | 44.7 | MT063047  |
| <i>Thymallus ligericus</i>             | 16657 | 27.2 | 27.4 | 28.1 | 17.3 | 55.3 | 44.7 | MT063052  |
| <i>Thymallus ligericus</i>             | 16657 | 27.2 | 27.4 | 28.1 | 17.3 | 55.3 | 44.7 | MT063048  |
| <i>Thymallus ligericus</i>             | 16657 | 27.2 | 27.4 | 28.1 | 17.3 | 55.3 | 44.7 | MT063049  |
| <i>Thymallus ligericus</i>             | 16657 | 27.2 | 27.4 | 28.1 | 17.3 | 55.3 | 44.7 | MT063050  |
| <i>Thymallus ligericus</i>             | 16655 | 27.2 | 27.4 | 28.1 | 17.3 | 55.3 | 44.7 | MT063051  |

|                              |       |      |      |      |      |      |      |           |
|------------------------------|-------|------|------|------|------|------|------|-----------|
| <i>Thymallus mertensii</i>   | 16662 | 27.4 | 27.3 | 28.2 | 17.1 | 55.6 | 44.4 | KT867088  |
| <i>Thymallus mertensii</i>   | 16662 | 27.4 | 27.3 | 28.2 | 17.1 | 55.6 | 44.4 | NC 029216 |
| <i>Thymallus mertensii</i>   | 16662 | 27.4 | 27.3 | 28.2 | 17.1 | 55.6 | 44.4 | KT867089  |
| <i>Thymallus nigrescens</i>  | 16661 | 27.3 | 27.5 | 28.2 | 17.1 | 55.4 | 44.6 | MT063028  |
| <i>Thymallus nigrescens</i>  | 16661 | 27.3 | 27.5 | 28.2 | 17.1 | 55.4 | 44.6 | NC 056307 |
| <i>Thymallus nikolskyi</i>   | 16661 | 27.3 | 27.5 | 28.1 | 17.1 | 55.4 | 44.6 | MT063029  |
| <i>Thymallus nikolskyi</i>   | 16657 | 27.2 | 27.5 | 28.1 | 17.1 | 55.4 | 44.6 | MT063030  |
| <i>Thymallus nikolskyi</i>   | 16661 | 27.3 | 27.5 | 28.1 | 17.1 | 55.4 | 44.6 | NC 056308 |
| <i>Thymallus pallasii</i>    | 16663 | 27.5 | 27.3 | 28.0 | 17.2 | 55.5 | 44.5 | NC 027408 |
| <i>Thymallus svetovidovi</i> | 16659 | 27.2 | 27.5 | 28.2 | 17.1 | 55.4 | 44.6 | MT063032  |
| <i>Thymallus svetovidovi</i> | 16660 | 27.2 | 27.5 | 28.2 | 17.1 | 55.4 | 44.6 | MT063031  |
| <i>Thymallus svetovidovi</i> | 16660 | 27.2 | 27.5 | 28.2 | 17.1 | 55.4 | 44.6 | NC 056309 |
| <i>Thymallus thymallus</i>   | 16659 | 27.0 | 27.5 | 28.2 | 17.3 | 55.2 | 44.8 | MT063004  |
| <i>Thymallus thymallus</i>   | 16658 | 27.1 | 27.5 | 28.2 | 17.2 | 55.3 | 44.7 | MT062995  |
| <i>Thymallus thymallus</i>   | 16657 | 27.2 | 27.4 | 28.1 | 17.3 | 55.3 | 44.7 | MT063001  |
| <i>Thymallus thymallus</i>   | 16659 | 27.1 | 27.5 | 28.1 | 17.3 | 55.3 | 44.7 | MT063002  |
| <i>Thymallus thymallus</i>   | 16659 | 27.1 | 27.5 | 28.1 | 17.3 | 55.2 | 44.8 | MT063045  |
| <i>Thymallus thymallus</i>   | 16657 | 27.0 | 27.6 | 28.2 | 17.2 | 55.2 | 44.8 | MT063041  |
| <i>Thymallus thymallus</i>   | 16657 | 27.1 | 27.5 | 28.0 | 17.3 | 55.1 | 44.9 | MT062994  |
| <i>Thymallus thymallus</i>   | 16659 | 27.1 | 27.5 | 28.2 | 17.2 | 55.3 | 44.7 | MT062999  |
| <i>Thymallus thymallus</i>   | 16658 | 27.1 | 27.5 | 28.2 | 17.2 | 55.3 | 44.7 | MT063000  |
| <i>Thymallus thymallus</i>   | 16657 | 27.1 | 27.5 | 28.1 | 17.2 | 55.3 | 44.7 | CM015041  |
| <i>Thymallus thymallus</i>   | 16657 | 27.1 | 27.5 | 28.1 | 17.3 | 55.2 | 44.8 | FJ853655  |
| <i>Thymallus thymallus</i>   | 16656 | 27.1 | 27.5 | 28.2 | 17.2 | 55.2 | 44.8 | MT410870  |
| <i>Thymallus thymallus</i>   | 16658 | 27.3 | 27.3 | 28.0 | 17.3 | 55.3 | 44.7 | MT062997  |
| <i>Thymallus thymallus</i>   | 16660 | 27.0 | 27.6 | 28.2 | 17.2 | 55.2 | 44.8 | MT063006  |
| <i>Thymallus thymallus</i>   | 16658 | 27.3 | 27.3 | 28.1 | 17.3 | 55.3 | 44.7 | MT062998  |
| <i>Thymallus thymallus</i>   | 16655 | 27.1 | 27.5 | 28.0 | 17.3 | 55.1 | 44.9 | MT062996  |
| <i>Thymallus thymallus</i>   | 16659 | 27.0 | 27.6 | 28.2 | 17.2 | 55.2 | 44.8 | MT063040  |
| <i>Thymallus thymallus</i>   | 16660 | 27.0 | 27.6 | 28.1 | 17.2 | 55.2 | 44.8 | MT063042  |
| <i>Thymallus thymallus</i>   | 16656 | 27.0 | 27.6 | 28.1 | 17.2 | 55.1 | 44.9 | MT063043  |
| <i>Thymallus thymallus</i>   | 16655 | 27.0 | 27.5 | 28.2 | 17.3 | 55.2 | 44.8 | MT063044  |
| <i>Thymallus thymallus</i>   | 16824 | 27.2 | 27.4 | 28.2 | 17.2 | 55.4 | 44.6 | MT062993  |
| <i>Thymallus thymallus</i>   | 16661 | 27.1 | 27.5 | 28.1 | 17.3 | 55.2 | 44.8 | MT063003  |
| <i>Thymallus thymallus</i>   | 16659 | 27.1 | 27.5 | 28.2 | 17.2 | 55.2 | 44.8 | MT063005  |
| <i>Thymallus thymallus</i>   | 16657 | 27.1 | 27.5 | 28.1 | 17.3 | 55.2 | 44.8 | NC 012928 |
| <i>Thymallus tugarinae</i>   | 16662 | 27.0 | 27.7 | 27.9 | 17.5 | 54.9 | 45.1 | NC 027409 |
| <i>Thymallus tugarinae</i>   | 16663 | 27.1 | 27.5 | 27.9 | 17.5 | 55.0 | 45.0 | KY078218  |
| <i>Thymallus tugarinae</i>   | 16664 | 27.0 | 27.6 | 27.8 | 17.6 | 54.8 | 45.2 | KY078217  |
| <i>Thymallus tugarinae</i>   | 16662 | 27.0 | 27.7 | 27.9 | 17.5 | 54.9 | 45.1 | KJ866483  |
| <i>Thymallus yaluensis</i>   | 16659 | 27.1 | 27.5 | 27.9 | 17.5 | 55.0 | 45.0 | KJ866484  |
| <i>Thymallus yaluensis</i>   | 16659 | 27.1 | 27.5 | 27.9 | 17.5 | 55.0 | 45.0 | NC 027410 |

**Table S2.** Species used in the phylogenetic analysis.

| Species                                  | Accession ID |            |
|------------------------------------------|--------------|------------|
| <i>Oncorhynchus chrysogaster</i>         | OP902890     | this study |
| <i>Oncorhynchus clarkii henshawi</i>     | AY886762     |            |
| <i>Oncorhynchus clarkii stomias</i>      | KP013107     |            |
| <i>Oncorhynchus clarkii virginalis</i>   | MW300343     |            |
| <i>Oncorhynchus gilae</i>                | MW300334     |            |
| <i>Oncorhynchus gilae apache</i>         | MW300342     |            |
| <i>Oncorhynchus gorboscha</i>            | EF455489     |            |
| <i>Oncorhynchus keta</i>                 | NC_017838    |            |
| <i>Oncorhynchus kisutch</i>              | MF621751     |            |
| <i>Oncorhynchus masou biwa</i>           | EF105342     |            |
| <i>Oncorhynchus masou formosanus</i>     | DQ858456     |            |
| <i>Oncorhynchus masou ishikawae</i>      | DQ864464     |            |
| <i>Oncorhynchus masou masou</i>          | DQ864465     |            |
| <i>Oncorhynchus mykiss</i>               | DQ288268     |            |
| <i>Oncorhynchus mykiss nelsoni</i>       | OP902891     | this study |
| <i>Oncorhynchus mykiss x Salmo salar</i> | KP218514     |            |
| <i>Oncorhynchus nerka</i>                | EF055889     |            |
| <i>Oncorhynchus tshawytscha</i>          | AF392054     |            |
| <i>Parahucho perryi</i>                  | KC897653     |            |
| <i>Salmo salar</i>                       | AF133701     |            |
| <i>Salvelinus fontinalis</i>             | AF154850     |            |
| <i>Salvelinus leucomaenis</i>            | MN972434     |            |
| <i>Salvelinus levanidovi</i>             | MK695626     |            |

**Table S3.** Nucleotide composition of the *12S* and *16S* rRNA genes in Salmonids.

| Species                                 | <i>12S</i> rRNA |       |      |      |      |      |      | <i>16S</i> rRNA |       |      |      |      |      |      | Accession ID |
|-----------------------------------------|-----------------|-------|------|------|------|------|------|-----------------|-------|------|------|------|------|------|--------------|
|                                         | Length          | %T(U) | %C   | %A   | %G   | %AT  | %GC  | Length          | %T(U) | %C   | %A   | %G   | %AT  | %GC  |              |
| <i>Brachymystax lenok</i>               | 947             | 20.1  | 27.3 | 29.8 | 22.8 | 49.8 | 50.2 | 1680            | 19.3  | 25.5 | 32.5 | 22.7 | 51.8 | 48.2 | JQ686730     |
| <i>Brachymystax lenok</i>               | 947             | 20.1  | 27.3 | 29.8 | 22.8 | 49.8 | 50.2 | 1680            | 19.3  | 25.5 | 32.5 | 22.7 | 51.8 | 48.2 | NC 018341    |
| <i>Brachymystax lenok tsinlingensis</i> | 947             | 20.2  | 27.2 | 29.6 | 23.0 | 49.7 | 50.3 | 1680            | 19.3  | 25.6 | 32.4 | 22.7 | 51.7 | 48.3 | JQ675732     |
| <i>Brachymystax lenok tsinlingensis</i> | 947             | 20.2  | 27.2 | 29.6 | 23.0 | 49.7 | 50.3 | 1680            | 19.3  | 25.6 | 32.4 | 22.7 | 51.7 | 48.3 | JQ686731     |
| <i>Brachymystax lenok tsinlingensis</i> | 947             | 20.2  | 27.2 | 29.6 | 23.0 | 49.7 | 50.3 | 1680            | 19.3  | 25.6 | 32.4 | 22.7 | 51.7 | 48.3 | NC 018342    |
| <i>Brachymystax tsinlingensis</i>       | 947             | 20.2  | 27.2 | 29.6 | 23.0 | 49.7 | 50.3 | 1676            | 19.2  | 25.6 | 32.5 | 22.7 | 51.7 | 48.3 | KY124134     |
| <i>Brachymystax tumensis</i>            | 948             | 20.1  | 27.3 | 29.7 | 22.8 | 49.9 | 50.1 | 1680            | 19.2  | 25.9 | 32.2 | 22.7 | 51.4 | 48.6 | KJ730524     |
| <i>Brachymystax tumensis</i>            | 948             | 20.1  | 27.3 | 29.7 | 22.8 | 49.9 | 50.1 | 1680            | 19.2  | 25.9 | 32.3 | 22.7 | 51.4 | 48.6 | KJ730525     |
| <i>Brachymystax tumensis</i>            | 948             | 20.1  | 27.3 | 29.7 | 22.8 | 49.9 | 50.1 | 1680            | 19.2  | 25.9 | 32.2 | 22.7 | 51.4 | 48.6 | NC 024674    |
| <i>Coregonus artedi</i>                 | 947             | 20.4  | 27.2 | 29.3 | 23.1 | 49.6 | 50.4 | 1679            | 19.5  | 25.3 | 31.8 | 23.4 | 51.3 | 48.7 | MF621765     |
| <i>Coregonus artedi</i>                 | 947             | 20.4  | 27.2 | 29.3 | 23.1 | 49.6 | 50.4 | 1679            | 19.5  | 25.3 | 31.7 | 23.5 | 51.2 | 48.8 | MF621766     |
| <i>Coregonus artedi</i>                 | 947             | 20.4  | 27.1 | 29.4 | 23.1 | 49.7 | 50.3 | 1679            | 19.5  | 25.3 | 31.8 | 23.4 | 51.3 | 48.7 | MH301055     |
| <i>Coregonus artedi</i>                 | 947             | 20.4  | 27.2 | 29.3 | 23.1 | 49.6 | 50.4 | 1679            | 19.5  | 25.3 | 31.8 | 23.4 | 51.3 | 48.7 | MH301056     |
| <i>Coregonus artedi</i>                 | 947             | 20.4  | 27.2 | 29.3 | 23.1 | 49.6 | 50.4 | 1679            | 19.5  | 25.3 | 31.7 | 23.5 | 51.2 | 48.8 | MW856899     |
| <i>Coregonus artedi</i>                 | 947             | 20.4  | 27.2 | 29.3 | 23.1 | 49.6 | 50.4 | 1679            | 19.5  | 25.3 | 31.8 | 23.4 | 51.3 | 48.7 | MW856900     |
| <i>Coregonus artedi</i>                 | 947             | 20.4  | 27.2 | 29.3 | 23.1 | 49.6 | 50.4 | 1679            | 19.5  | 25.3 | 31.8 | 23.4 | 51.3 | 48.7 | NC 036393    |
| <i>Coregonus autumnalis</i>             | 947             | 20.5  | 27.1 | 29.3 | 23.1 | 49.7 | 50.3 | 1679            | 19.4  | 25.6 | 31.7 | 23.3 | 51.1 | 48.9 | KP452507     |
| <i>Coregonus autumnalis</i>             | 947             | 20.5  | 27.1 | 29.3 | 23.1 | 49.7 | 50.3 | 1679            | 19.4  | 25.6 | 31.7 | 23.3 | 51.1 | 48.9 | NC 027277    |
| <i>Coregonus baicalensis</i>            | 947             | 20.4  | 27.3 | 29.1 | 23.1 | 49.5 | 50.5 | 1679            | 19.4  | 25.5 | 31.9 | 23.2 | 51.3 | 48.7 | MN394784     |
| <i>Coregonus baicalensis</i>            | 947             | 20.4  | 27.3 | 29.1 | 23.1 | 49.5 | 50.5 | 1679            | 19.4  | 25.5 | 31.9 | 23.2 | 51.3 | 48.7 | MN394785     |
| <i>Coregonus baicalensis</i>            | 947             | 20.4  | 27.3 | 29.1 | 23.1 | 49.5 | 50.5 | 1679            | 19.4  | 25.5 | 31.9 | 23.2 | 51.3 | 48.7 | MN394786     |
| <i>Coregonus baicalensis</i>            | 947             | 20.4  | 27.3 | 29.1 | 23.1 | 49.5 | 50.5 | 1679            | 19.4  | 25.5 | 31.9 | 23.2 | 51.3 | 48.7 | NC 045226    |
| <i>Coregonus chadary</i>                | 947             | 20.3  | 27.3 | 29.1 | 23.2 | 49.4 | 50.6 | 1679            | 19.3  | 25.6 | 31.8 | 23.3 | 51.1 | 48.9 | KU530206     |
| <i>Coregonus chadary</i>                | 947             | 20.3  | 27.3 | 29.1 | 23.2 | 49.4 | 50.6 | 1679            | 19.3  | 25.6 | 31.8 | 23.3 | 51.1 | 48.9 | NC 030175    |
| <i>Coregonus clupeaformis</i>           | 947             | 20.5  | 27.1 | 29.3 | 23.1 | 49.7 | 50.3 | 1679            | 19.4  | 25.6 | 31.7 | 23.3 | 51.1 | 48.9 | JQ661482     |
| <i>Coregonus clupeaformis</i>           | 947             | 20.5  | 27.1 | 29.3 | 23.1 | 49.7 | 50.3 | 1679            | 19.4  | 25.6 | 31.7 | 23.3 | 51.1 | 48.9 | JQ661483     |
| <i>Coregonus clupeaformis</i>           | 947             | 20.5  | 27.1 | 29.3 | 23.1 | 49.7 | 50.3 | 1679            | 19.4  | 25.6 | 31.7 | 23.3 | 51.1 | 48.9 | JQ661484     |
| <i>Coregonus clupeaformis</i>           | 947             | 20.5  | 27.1 | 29.3 | 23.1 | 49.7 | 50.3 | 1679            | 19.4  | 25.6 | 31.7 | 23.3 | 51.1 | 48.9 | JQ661485     |
| <i>Coregonus clupeaformis</i>           | 947             | 20.5  | 27.1 | 29.3 | 23.1 | 49.7 | 50.3 | 1679            | 19.3  | 25.6 | 31.7 | 23.3 | 51.0 | 49.0 | JQ661486     |
| <i>Coregonus clupeaformis</i>           | 947             | 20.5  | 27.1 | 29.4 | 23.0 | 49.8 | 50.2 | 1679            | 19.4  | 25.6 | 31.7 | 23.3 | 51.1 | 48.9 | JQ661487     |



|                               |     |      |      |      |      |      |      |      |      |      |      |      |      |      |           |
|-------------------------------|-----|------|------|------|------|------|------|------|------|------|------|------|------|------|-----------|
| <i>Coregonus clupeaformis</i> | 947 | 20.5 | 27.1 | 29.3 | 23.1 | 49.7 | 50.3 | 1679 | 19.4 | 25.6 | 31.7 | 23.3 | 51.1 | 48.9 | MH301057  |
| <i>Coregonus clupeaformis</i> | 947 | 20.5 | 27.1 | 29.3 | 23.1 | 49.7 | 50.3 | 1679 | 19.4 | 25.6 | 31.8 | 23.3 | 51.2 | 48.8 | MH301058  |
| <i>Coregonus clupeaformis</i> | 947 | 20.6 | 27.0 | 29.3 | 23.1 | 49.8 | 50.2 | 1679 | 19.4 | 25.6 | 31.7 | 23.3 | 51.1 | 48.9 | NC 020762 |
| <i>Coregonus clupeaformis</i> | 947 | 20.6 | 27.0 | 29.3 | 23.1 | 49.8 | 50.2 | 1679 | 19.4 | 25.6 | 31.7 | 23.3 | 51.1 | 48.9 | JQ390060  |
| <i>Coregonus hoyi</i>         | 947 | 20.5 | 27.1 | 29.3 | 23.1 | 49.7 | 50.3 | 1679 | 19.5 | 25.3 | 31.8 | 23.4 | 51.3 | 48.7 | MT667235  |
| <i>Coregonus hoyi</i>         | 947 | 20.4 | 27.2 | 29.3 | 23.1 | 49.6 | 50.4 | 1679 | 19.5 | 25.3 | 31.8 | 23.4 | 51.3 | 48.7 | MW856853  |
| <i>Coregonus hoyi</i>         | 947 | 20.5 | 27.1 | 29.3 | 23.1 | 49.7 | 50.3 | 1679 | 19.5 | 25.3 | 31.8 | 23.4 | 51.3 | 48.7 | MW856901  |
| <i>Coregonus hoyi</i>         | 947 | 20.5 | 27.1 | 29.3 | 23.1 | 49.7 | 50.3 | 1679 | 19.5 | 25.3 | 31.8 | 23.4 | 51.3 | 48.7 | MW856902  |
| <i>Coregonus hoyi</i>         | 947 | 20.5 | 27.1 | 29.3 | 23.1 | 49.7 | 50.3 | 1679 | 19.5 | 25.3 | 31.8 | 23.4 | 51.3 | 48.7 | NC 054288 |
| <i>Coregonus lavaretus</i>    | 947 | 20.5 | 27.2 | 29.1 | 23.1 | 49.6 | 50.4 | 1679 | 19.4 | 25.4 | 31.8 | 23.4 | 51.2 | 48.8 | JQ661382  |
| <i>Coregonus lavaretus</i>    | 947 | 20.5 | 27.2 | 29.1 | 23.1 | 49.6 | 50.4 | 1679 | 19.4 | 25.4 | 31.8 | 23.4 | 51.2 | 48.8 | JQ661383  |
| <i>Coregonus lavaretus</i>    | 947 | 20.5 | 27.2 | 29.1 | 23.1 | 49.6 | 50.4 | 1679 | 19.4 | 25.4 | 31.8 | 23.4 | 51.2 | 48.8 | JQ661384  |
| <i>Coregonus lavaretus</i>    | 947 | 20.5 | 27.2 | 29.1 | 23.1 | 49.6 | 50.4 | 1679 | 19.4 | 25.4 | 31.8 | 23.4 | 51.2 | 48.8 | JQ661385  |
| <i>Coregonus lavaretus</i>    | 947 | 20.5 | 27.2 | 29.1 | 23.1 | 49.6 | 50.4 | 1679 | 19.4 | 25.4 | 31.8 | 23.4 | 51.2 | 48.8 | JQ661386  |
| <i>Coregonus lavaretus</i>    | 947 | 20.5 | 27.2 | 29.1 | 23.1 | 49.6 | 50.4 | 1679 | 19.4 | 25.4 | 31.8 | 23.4 | 51.2 | 48.8 | JQ661387  |
| <i>Coregonus lavaretus</i>    | 947 | 20.5 | 27.2 | 29.1 | 23.1 | 49.6 | 50.4 | 1679 | 19.4 | 25.4 | 31.8 | 23.4 | 51.2 | 48.8 | JQ661388  |
| <i>Coregonus lavaretus</i>    | 947 | 20.5 | 27.2 | 29.1 | 23.1 | 49.6 | 50.4 | 1679 | 19.4 | 25.4 | 31.8 | 23.4 | 51.2 | 48.8 | JQ661389  |
| <i>Coregonus lavaretus</i>    | 947 | 20.5 | 27.2 | 29.3 | 23.0 | 49.7 | 50.3 | 1679 | 19.4 | 25.4 | 31.8 | 23.4 | 51.2 | 48.8 | JQ661390  |
| <i>Coregonus lavaretus</i>    | 947 | 20.5 | 27.2 | 29.1 | 23.1 | 49.6 | 50.4 | 1679 | 19.4 | 25.4 | 31.8 | 23.4 | 51.2 | 48.8 | JQ661392  |
| <i>Coregonus lavaretus</i>    | 947 | 20.5 | 27.2 | 29.1 | 23.1 | 49.6 | 50.4 | 1679 | 19.4 | 25.4 | 31.8 | 23.4 | 51.2 | 48.8 | JQ661393  |
| <i>Coregonus lavaretus</i>    | 947 | 20.5 | 27.2 | 29.1 | 23.1 | 49.6 | 50.4 | 1679 | 19.4 | 25.5 | 31.8 | 23.3 | 51.2 | 48.8 | JQ661419  |
| <i>Coregonus lavaretus</i>    | 947 | 20.5 | 27.2 | 29.1 | 23.1 | 49.6 | 50.4 | 1679 | 19.4 | 25.5 | 31.8 | 23.3 | 51.2 | 48.8 | JQ661420  |
| <i>Coregonus lavaretus</i>    | 947 | 20.5 | 27.2 | 29.1 | 23.1 | 49.6 | 50.4 | 1679 | 19.4 | 25.5 | 31.8 | 23.3 | 51.2 | 48.8 | JQ661421  |
| <i>Coregonus lavaretus</i>    | 947 | 20.5 | 27.2 | 29.1 | 23.1 | 49.6 | 50.4 | 1679 | 19.4 | 25.5 | 31.8 | 23.3 | 51.2 | 48.8 | JQ661422  |
| <i>Coregonus lavaretus</i>    | 947 | 20.5 | 27.2 | 29.1 | 23.1 | 49.6 | 50.4 | 1679 | 19.4 | 25.5 | 31.8 | 23.3 | 51.2 | 48.8 | JQ661423  |
| <i>Coregonus lavaretus</i>    | 947 | 20.5 | 27.2 | 29.1 | 23.1 | 49.6 | 50.4 | 1679 | 19.4 | 25.5 | 31.8 | 23.3 | 51.2 | 48.8 | JQ661424  |
| <i>Coregonus lavaretus</i>    | 947 | 20.5 | 27.2 | 29.1 | 23.1 | 49.6 | 50.4 | 1679 | 19.4 | 25.5 | 31.8 | 23.3 | 51.2 | 48.8 | JQ661425  |
| <i>Coregonus lavaretus</i>    | 947 | 20.5 | 27.2 | 29.1 | 23.1 | 49.6 | 50.4 | 1679 | 19.4 | 25.5 | 31.8 | 23.3 | 51.2 | 48.8 | JQ661426  |
| <i>Coregonus lavaretus</i>    | 947 | 20.5 | 27.2 | 29.1 | 23.1 | 49.6 | 50.4 | 1679 | 19.4 | 25.5 | 31.8 | 23.3 | 51.2 | 48.8 | JQ661427  |
| <i>Coregonus lavaretus</i>    | 947 | 20.5 | 27.2 | 29.1 | 23.1 | 49.6 | 50.4 | 1679 | 19.4 | 25.5 | 31.8 | 23.3 | 51.2 | 48.8 | JQ661431  |
| <i>Coregonus lavaretus</i>    | 947 | 20.5 | 27.2 | 29.1 | 23.1 | 49.6 | 50.4 | 1679 | 19.4 | 25.5 | 31.8 | 23.3 | 51.2 | 48.8 | JQ661432  |
| <i>Coregonus lavaretus</i>    | 947 | 20.5 | 27.2 | 29.1 | 23.1 | 49.6 | 50.4 | 1679 | 19.4 | 25.5 | 31.8 | 23.3 | 51.2 | 48.8 | JQ661435  |
| <i>Coregonus lavaretus</i>    | 947 | 20.5 | 27.2 | 29.1 | 23.1 | 49.6 | 50.4 | 1679 | 19.4 | 25.5 | 31.8 | 23.3 | 51.2 | 48.8 | JQ661436  |
| <i>Coregonus lavaretus</i>    | 947 | 20.5 | 27.2 | 29.1 | 23.1 | 49.6 | 50.4 | 1679 | 19.4 | 25.5 | 31.8 | 23.3 | 51.2 | 48.8 | JQ661437  |

[illegible]

|                              |     |      |      |      |      |      |      |      |      |      |      |      |      |      |           |
|------------------------------|-----|------|------|------|------|------|------|------|------|------|------|------|------|------|-----------|
| <i>Coregonus lavaretus</i>   | 947 | 20.5 | 27.2 | 29.1 | 23.1 | 49.6 | 50.4 | 1679 | 19.4 | 25.5 | 31.8 | 23.3 | 51.2 | 48.8 | JQ661478  |
| <i>Coregonus lavaretus</i>   | 947 | 20.5 | 27.2 | 29.0 | 23.2 | 49.5 | 50.5 | 1679 | 19.4 | 25.5 | 31.8 | 23.3 | 51.2 | 48.8 | JQ661479  |
| <i>Coregonus lavaretus</i>   | 946 | 20.5 | 27.2 | 29.2 | 23.2 | 49.7 | 50.3 | 1679 | 19.4 | 25.5 | 31.8 | 23.3 | 51.2 | 48.8 | JQ661480  |
| <i>Coregonus lavaretus</i>   | 947 | 20.5 | 27.2 | 29.1 | 23.1 | 49.6 | 50.4 | 1679 | 19.4 | 25.5 | 31.8 | 23.3 | 51.2 | 48.8 | JQ661481  |
| <i>Coregonus lavaretus</i>   | 947 | 20.5 | 27.2 | 29.1 | 23.1 | 49.6 | 50.4 | 1679 | 19.4 | 25.4 | 31.7 | 23.5 | 51.1 | 48.9 | MK913369  |
| <i>Coregonus lavaretus</i>   | 947 | 20.5 | 27.2 | 29.1 | 23.1 | 49.6 | 50.4 | 1679 | 19.4 | 25.4 | 31.7 | 23.4 | 51.2 | 48.8 | AB034824  |
| <i>Coregonus lavaretus</i>   | 947 | 20.5 | 27.2 | 29.1 | 23.1 | 49.6 | 50.4 | 1679 | 19.4 | 25.4 | 31.9 | 23.3 | 51.2 | 48.8 | JQ661391  |
| <i>Coregonus lavaretus</i>   | 947 | 20.5 | 27.2 | 29.1 | 23.1 | 49.6 | 50.4 | 1679 | 19.4 | 25.4 | 31.8 | 23.4 | 51.2 | 48.8 | JQ661394  |
| <i>Coregonus lavaretus</i>   | 947 | 20.5 | 27.2 | 29.1 | 23.1 | 49.6 | 50.4 | 1679 | 19.4 | 25.4 | 31.8 | 23.4 | 51.2 | 48.8 | JQ661395  |
| <i>Coregonus lavaretus</i>   | 947 | 20.5 | 27.2 | 29.1 | 23.1 | 49.6 | 50.4 | 1679 | 19.4 | 25.4 | 31.8 | 23.4 | 51.2 | 48.8 | JQ661396  |
| <i>Coregonus lavaretus</i>   | 947 | 20.5 | 27.2 | 29.3 | 23.0 | 49.7 | 50.3 | 1679 | 19.4 | 25.4 | 31.8 | 23.4 | 51.2 | 48.8 | JQ661397  |
| <i>Coregonus lavaretus</i>   | 947 | 20.5 | 27.2 | 29.1 | 23.1 | 49.6 | 50.4 | 1679 | 19.4 | 25.5 | 31.8 | 23.3 | 51.2 | 48.8 | JQ661428  |
| <i>Coregonus lavaretus</i>   | 947 | 20.5 | 27.2 | 29.1 | 23.1 | 49.6 | 50.4 | 1679 | 19.4 | 25.5 | 31.8 | 23.3 | 51.2 | 48.8 | JQ661429  |
| <i>Coregonus lavaretus</i>   | 947 | 20.5 | 27.2 | 29.1 | 23.1 | 49.6 | 50.4 | 1679 | 19.4 | 25.5 | 31.8 | 23.3 | 51.2 | 48.8 | JQ661430  |
| <i>Coregonus lavaretus</i>   | 947 | 20.5 | 27.2 | 29.1 | 23.1 | 49.6 | 50.4 | 1679 | 19.4 | 25.5 | 31.8 | 23.3 | 51.2 | 48.8 | JQ661433  |
| <i>Coregonus lavaretus</i>   | 947 | 20.5 | 27.2 | 29.1 | 23.1 | 49.6 | 50.4 | 1679 | 19.4 | 25.5 | 31.8 | 23.3 | 51.2 | 48.8 | JQ661434  |
| <i>Coregonus lavaretus</i>   | 947 | 20.5 | 27.2 | 29.1 | 23.1 | 49.6 | 50.4 | 1679 | 19.4 | 25.5 | 31.8 | 23.3 | 51.2 | 48.8 | JQ661442  |
| <i>Coregonus lavaretus</i>   | 947 | 20.5 | 27.2 | 29.1 | 23.1 | 49.6 | 50.4 | 1679 | 19.4 | 25.5 | 31.8 | 23.3 | 51.2 | 48.8 | JQ661448  |
| <i>Coregonus lavaretus</i>   | 947 | 20.5 | 27.2 | 29.1 | 23.1 | 49.6 | 50.4 | 1679 | 19.4 | 25.5 | 31.8 | 23.3 | 51.2 | 48.8 | JQ661450  |
| <i>Coregonus lavaretus</i>   | 947 | 20.5 | 27.2 | 29.1 | 23.1 | 49.6 | 50.4 | 1679 | 19.4 | 25.5 | 31.8 | 23.3 | 51.2 | 48.8 | JQ661459  |
| <i>Coregonus lavaretus</i>   | 947 | 20.5 | 27.2 | 29.1 | 23.1 | 49.6 | 50.4 | 1679 | 19.4 | 25.5 | 31.8 | 23.3 | 51.2 | 48.8 | JQ661460  |
| <i>Coregonus lavaretus</i>   | 947 | 20.5 | 27.2 | 29.1 | 23.1 | 49.6 | 50.4 | 1679 | 19.4 | 25.5 | 31.8 | 23.3 | 51.2 | 48.8 | JQ661461  |
| <i>Coregonus lavaretus</i>   | 947 | 20.5 | 27.2 | 29.1 | 23.1 | 49.6 | 50.4 | 1679 | 19.4 | 25.4 | 31.7 | 23.4 | 51.2 | 48.8 | NC 002646 |
| <i>Coregonus migratorius</i> | 947 | 20.4 | 27.3 | 29.1 | 23.1 | 49.5 | 50.5 | 1679 | 19.4 | 25.4 | 31.9 | 23.3 | 51.2 | 48.8 | MN394787  |
| <i>Coregonus migratorius</i> | 947 | 20.4 | 27.3 | 29.1 | 23.1 | 49.5 | 50.5 | 1679 | 19.4 | 25.4 | 31.9 | 23.2 | 51.3 | 48.7 | MN394788  |
| <i>Coregonus migratorius</i> | 947 | 20.4 | 27.3 | 29.1 | 23.1 | 49.5 | 50.5 | 1679 | 19.4 | 25.4 | 31.9 | 23.3 | 51.2 | 48.8 | NC 045227 |
| <i>Coregonus migratorius</i> | 947 | 20.4 | 27.3 | 29.0 | 23.2 | 49.4 | 50.6 | 1679 | 19.4 | 25.5 | 31.9 | 23.2 | 51.3 | 48.7 | MN394789  |
| <i>Coregonus muksun</i>      | 947 | 20.5 | 27.2 | 29.3 | 23.0 | 49.7 | 50.3 | 1679 | 19.4 | 25.4 | 31.8 | 23.4 | 51.2 | 48.8 | KT824877  |
| <i>Coregonus muksun</i>      | 947 | 20.5 | 27.2 | 29.3 | 23.0 | 49.7 | 50.3 | 1679 | 19.4 | 25.4 | 31.8 | 23.4 | 51.2 | 48.8 | NC 028593 |
| <i>Coregonus nasus</i>       | 947 | 20.3 | 27.3 | 29.1 | 23.2 | 49.4 | 50.6 | 1679 | 19.3 | 25.6 | 31.8 | 23.3 | 51.1 | 48.9 | JQ390058  |
| <i>Coregonus nasus</i>       | 947 | 20.3 | 27.3 | 29.1 | 23.2 | 49.4 | 50.6 | 1679 | 19.3 | 25.6 | 31.8 | 23.3 | 51.1 | 48.9 | NC 020760 |
| <i>Coregonus oxyrinchus</i>  | 947 | 20.5 | 27.2 | 29.1 | 23.1 | 49.6 | 50.4 | 1679 | 19.4 | 25.5 | 31.8 | 23.3 | 51.2 | 48.8 | JQ661398  |
| <i>Coregonus oxyrinchus</i>  | 947 | 20.5 | 27.2 | 29.1 | 23.1 | 49.6 | 50.4 | 1679 | 19.4 | 25.5 | 31.8 | 23.3 | 51.2 | 48.8 | JQ661399  |
| <i>Coregonus oxyrinchus</i>  | 947 | 20.5 | 27.2 | 29.1 | 23.1 | 49.6 | 50.4 | 1679 | 19.4 | 25.5 | 31.8 | 23.3 | 51.2 | 48.8 | JQ661400  |

|                                   |     |      |      |      |      |      |      |      |      |      |      |      |      |      |           |
|-----------------------------------|-----|------|------|------|------|------|------|------|------|------|------|------|------|------|-----------|
| <i>Coregonus oxyrinchus</i>       | 947 | 20.6 | 27.1 | 29.1 | 23.1 | 49.7 | 50.3 | 1679 | 19.4 | 25.4 | 31.8 | 23.4 | 51.2 | 48.8 | JQ661401  |
| <i>Coregonus oxyrinchus</i>       | 947 | 20.5 | 27.2 | 29.1 | 23.1 | 49.6 | 50.4 | 1679 | 19.4 | 25.5 | 31.9 | 23.3 | 51.2 | 48.8 | JQ661402  |
| <i>Coregonus oxyrinchus</i>       | 947 | 20.5 | 27.2 | 29.1 | 23.1 | 49.6 | 50.4 | 1679 | 19.4 | 25.5 | 31.8 | 23.3 | 51.2 | 48.8 | JQ661403  |
| <i>Coregonus oxyrinchus</i>       | 947 | 20.5 | 27.2 | 29.1 | 23.1 | 49.6 | 50.4 | 1679 | 19.4 | 25.4 | 31.8 | 23.4 | 51.2 | 48.8 | JQ661404  |
| <i>Coregonus oxyrinchus</i>       | 947 | 20.5 | 27.2 | 29.1 | 23.1 | 49.6 | 50.4 | 1679 | 19.4 | 25.5 | 31.9 | 23.3 | 51.2 | 48.8 | JQ661405  |
| <i>Coregonus oxyrinchus</i>       | 947 | 20.5 | 27.2 | 29.1 | 23.1 | 49.6 | 50.4 | 1679 | 19.4 | 25.5 | 31.8 | 23.3 | 51.2 | 48.8 | JQ661406  |
| <i>Coregonus oxyrinchus</i>       | 947 | 20.5 | 27.2 | 29.1 | 23.1 | 49.6 | 50.4 | 1679 | 19.4 | 25.5 | 31.8 | 23.3 | 51.2 | 48.8 | JQ661407  |
| <i>Coregonus oxyrinchus</i>       | 947 | 20.5 | 27.2 | 29.1 | 23.1 | 49.6 | 50.4 | 1679 | 19.4 | 25.5 | 31.8 | 23.3 | 51.2 | 48.8 | JQ661408  |
| <i>Coregonus oxyrinchus</i>       | 947 | 20.5 | 27.2 | 29.1 | 23.1 | 49.6 | 50.4 | 1679 | 19.4 | 25.5 | 31.8 | 23.3 | 51.2 | 48.8 | JQ661409  |
| <i>Coregonus oxyrinchus</i>       | 947 | 20.5 | 27.2 | 29.1 | 23.1 | 49.6 | 50.4 | 1679 | 19.4 | 25.5 | 31.8 | 23.3 | 51.2 | 48.8 | JQ661410  |
| <i>Coregonus oxyrinchus</i>       | 947 | 20.5 | 27.2 | 29.1 | 23.1 | 49.6 | 50.4 | 1679 | 19.4 | 25.5 | 31.9 | 23.3 | 51.2 | 48.8 | JQ661411  |
| <i>Coregonus oxyrinchus</i>       | 947 | 20.5 | 27.2 | 29.1 | 23.1 | 49.6 | 50.4 | 1679 | 19.4 | 25.5 | 31.8 | 23.3 | 51.2 | 48.8 | JQ661412  |
| <i>Coregonus oxyrinchus</i>       | 947 | 20.5 | 27.2 | 29.1 | 23.1 | 49.6 | 50.4 | 1679 | 19.4 | 25.5 | 31.8 | 23.3 | 51.2 | 48.8 | JQ661413  |
| <i>Coregonus oxyrinchus</i>       | 947 | 20.5 | 27.2 | 29.1 | 23.1 | 49.6 | 50.4 | 1679 | 19.4 | 25.5 | 31.8 | 23.3 | 51.2 | 48.8 | JQ661414  |
| <i>Coregonus oxyrinchus</i>       | 947 | 20.5 | 27.2 | 29.1 | 23.1 | 49.6 | 50.4 | 1679 | 19.4 | 25.5 | 31.8 | 23.3 | 51.2 | 48.8 | JQ661415  |
| <i>Coregonus oxyrinchus</i>       | 947 | 20.5 | 27.2 | 29.1 | 23.1 | 49.6 | 50.4 | 1679 | 19.4 | 25.5 | 31.8 | 23.3 | 51.2 | 48.8 | JQ661416  |
| <i>Coregonus oxyrinchus</i>       | 947 | 20.6 | 27.1 | 29.1 | 23.1 | 49.7 | 50.3 | 1678 | 19.4 | 25.4 | 31.8 | 23.4 | 51.2 | 48.8 | JQ661417  |
| <i>Coregonus oxyrinchus</i>       | 947 | 20.5 | 27.2 | 29.1 | 23.1 | 49.6 | 50.4 | 1679 | 19.4 | 25.5 | 31.9 | 23.3 | 51.2 | 48.8 | JQ661418  |
| <i>Coregonus oxyrinchus</i>       | 947 | 20.5 | 27.2 | 29.1 | 23.1 | 49.6 | 50.4 | 1679 | 19.4 | 25.5 | 31.9 | 23.3 | 51.2 | 48.8 | NC 020765 |
| <i>Coregonus peled</i>            | 947 | 20.5 | 27.2 | 29.1 | 23.1 | 49.6 | 50.4 | 1679 | 19.4 | 25.5 | 31.8 | 23.3 | 51.2 | 48.8 | KM361633  |
| <i>Coregonus peled</i>            | 947 | 20.5 | 27.2 | 29.1 | 23.1 | 49.6 | 50.4 | 1679 | 19.4 | 25.5 | 31.8 | 23.3 | 51.2 | 48.8 | NC 025576 |
| <i>Coregonus sp. cluncaformis</i> | 947 | 20.5 | 27.2 | 29.1 | 23.1 | 49.6 | 50.4 | 1679 | 19.4 | 25.4 | 31.8 | 23.4 | 51.2 | 48.8 | KT375339  |
| <i>Coregonus sp. cluncaformis</i> | 947 | 20.5 | 27.2 | 29.1 | 23.1 | 49.6 | 50.4 | 1679 | 19.4 | 25.4 | 31.8 | 23.4 | 51.2 | 48.8 | NC 028198 |
| <i>Coregonus ussuriensis</i>      | 947 | 20.5 | 27.2 | 29.1 | 23.1 | 49.6 | 50.4 | 1679 | 19.4 | 25.5 | 31.7 | 23.4 | 51.1 | 48.9 | KM210289  |
| <i>Coregonus ussuriensis</i>      | 947 | 20.5 | 27.2 | 29.1 | 23.1 | 49.6 | 50.4 | 1679 | 19.4 | 25.5 | 31.7 | 23.4 | 51.1 | 48.9 | NC 025648 |
| <i>Hucho bleekeri</i>             | 947 | 20.1 | 27.3 | 29.7 | 22.9 | 49.7 | 50.3 | 1680 | 19.2 | 25.9 | 32.3 | 22.6 | 51.5 | 48.5 | HM804473  |
| <i>Hucho bleekeri</i>             | 947 | 20.0 | 27.5 | 29.7 | 22.9 | 49.6 | 50.4 | 1680 | 19.3 | 25.8 | 32.3 | 22.7 | 51.5 | 48.5 | KF908853  |
| <i>Hucho bleekeri</i>             | 947 | 20.1 | 27.3 | 29.7 | 22.9 | 49.7 | 50.3 | 1680 | 19.2 | 25.9 | 32.3 | 22.6 | 51.5 | 48.5 | NC 015995 |
| <i>Hucho hucho</i>                | 947 | 20.1 | 27.3 | 29.7 | 22.9 | 49.7 | 50.3 | 1680 | 19.2 | 25.8 | 32.1 | 22.9 | 51.4 | 48.6 | KM588351  |
| <i>Hucho hucho</i>                | 947 | 20.1 | 27.3 | 29.7 | 22.9 | 49.7 | 50.3 | 1680 | 19.2 | 25.8 | 32.1 | 22.9 | 51.4 | 48.6 | NC 025589 |
| <i>Hucho taimen</i>               | 947 | 20.1 | 27.3 | 29.7 | 22.9 | 49.7 | 50.3 | 1680 | 19.3 | 25.8 | 32.0 | 22.9 | 51.4 | 48.6 | HQ897271  |
| <i>Hucho taimen</i>               | 947 | 20.1 | 27.3 | 29.7 | 22.9 | 49.7 | 50.3 | 1680 | 19.3 | 25.8 | 32.0 | 22.9 | 51.3 | 48.7 | KJ711549  |
| <i>Hucho taimen</i>               | 947 | 20.1 | 27.3 | 29.7 | 22.9 | 49.7 | 50.3 | 1680 | 19.2 | 25.8 | 32.1 | 22.8 | 51.4 | 48.6 | KJ711550  |
| <i>Hucho taimen</i>               | 947 | 20.1 | 27.3 | 29.7 | 22.9 | 49.7 | 50.3 | 1680 | 19.3 | 25.8 | 32.1 | 22.8 | 51.4 | 48.6 | MK258077  |

|                                        |     |      |      |      |      |      |      |      |      |      |      |      |      |      |           |               |
|----------------------------------------|-----|------|------|------|------|------|------|------|------|------|------|------|------|------|-----------|---------------|
| <i>Hucho taimen</i>                    | 947 | 20.1 | 27.3 | 29.7 | 22.9 | 49.7 | 50.3 | 1680 | 19.3 | 25.8 | 32.1 | 22.8 | 51.4 | 48.6 | MK258078  | this<br>study |
| <i>Hucho taimen</i>                    | 947 | 20.1 | 27.3 | 29.7 | 22.9 | 49.7 | 50.3 | 1680 | 19.3 | 25.8 | 32.1 | 22.8 | 51.4 | 48.6 | MK258079  |               |
| <i>Hucho taimen</i>                    | 947 | 20.1 | 27.3 | 29.7 | 22.9 | 49.7 | 50.3 | 1680 | 19.3 | 25.8 | 32.1 | 22.8 | 51.4 | 48.6 | MK258080  |               |
| <i>Hucho taimen</i>                    | 947 | 20.1 | 27.3 | 29.7 | 22.9 | 49.7 | 50.3 | 1680 | 19.2 | 25.8 | 32.1 | 22.9 | 51.4 | 48.6 | MK258081  |               |
| <i>Hucho taimen</i>                    | 947 | 20.1 | 27.3 | 29.7 | 22.9 | 49.7 | 50.3 | 1680 | 19.3 | 25.8 | 32.0 | 22.9 | 51.3 | 48.7 | MK258082  |               |
| <i>Hucho taimen</i>                    | 947 | 20.1 | 27.3 | 29.7 | 22.9 | 49.7 | 50.3 | 1680 | 19.3 | 25.8 | 32.0 | 22.9 | 51.3 | 48.7 | MK258083  |               |
| <i>Hucho taimen</i>                    | 947 | 20.1 | 27.3 | 29.7 | 22.9 | 49.7 | 50.3 | 1680 | 19.3 | 25.8 | 32.0 | 22.9 | 51.3 | 48.7 | MK258084  |               |
| <i>Hucho taimen</i>                    | 947 | 20.1 | 27.3 | 29.7 | 22.9 | 49.7 | 50.3 | 1680 | 19.3 | 25.8 | 32.0 | 22.9 | 51.4 | 48.6 | NC 016426 |               |
| <i>Oncorhynchus chrysogaster</i>       | 947 | 19.5 | 27.7 | 30.0 | 22.8 | 49.5 | 50.5 | 1659 | 19.5 | 25.6 | 32.2 | 22.7 | 51.7 | 48.3 | OP902890  | this<br>study |
| <i>Oncorhynchus clarkii henshawi</i>   | 947 | 19.6 | 27.3 | 30.3 | 22.7 | 49.9 | 50.1 | 1677 | 19.6 | 25.0 | 32.4 | 23.0 | 52.0 | 48.0 | AY886762  |               |
| <i>Oncorhynchus clarkii henshawi</i>   | 947 | 19.6 | 27.3 | 30.3 | 22.7 | 49.9 | 50.1 | 1677 | 19.6 | 25.0 | 32.4 | 23.0 | 52.0 | 48.0 | NC 006897 |               |
| <i>Oncorhynchus clarkii stomias</i>    | 947 | 19.6 | 27.3 | 30.5 | 22.5 | 50.2 | 49.8 | 1678 | 19.4 | 25.3 | 32.4 | 22.9 | 51.8 | 48.2 | KP013107  |               |
| <i>Oncorhynchus clarkii stomias</i>    | 947 | 19.6 | 27.3 | 30.5 | 22.5 | 50.2 | 49.8 | 1678 | 19.4 | 25.3 | 32.4 | 22.9 | 51.8 | 48.2 | KP013117  |               |
| <i>Oncorhynchus clarkii virginalis</i> | 947 | 19.7 | 27.2 | 30.1 | 22.9 | 49.8 | 50.2 | 1678 | 19.5 | 25.2 | 32.5 | 22.8 | 52.0 | 48.0 | MW300344  |               |
| <i>Oncorhynchus clarkii virginalis</i> | 947 | 19.7 | 27.2 | 30.1 | 22.9 | 49.8 | 50.2 | 1678 | 19.5 | 25.2 | 32.5 | 22.8 | 52.0 | 48.0 | MW300343  |               |
| <i>Oncorhynchus gilae</i>              | 947 | 19.5 | 27.7 | 30.1 | 22.7 | 49.6 | 50.4 | 1680 | 19.5 | 25.5 | 32.2 | 22.7 | 51.7 | 48.3 | MW300334  |               |
| <i>Oncorhynchus gilae</i>              | 947 | 19.5 | 27.7 | 30.1 | 22.7 | 49.6 | 50.4 | 1680 | 19.5 | 25.6 | 32.2 | 22.7 | 51.7 | 48.3 | MW300335  |               |
| <i>Oncorhynchus gilae</i>              | 947 | 19.5 | 27.7 | 30.1 | 22.7 | 49.6 | 50.4 | 1680 | 19.5 | 25.6 | 32.1 | 22.7 | 51.7 | 48.3 | MW300336  |               |
| <i>Oncorhynchus gilae</i>              | 947 | 19.5 | 27.7 | 30.1 | 22.7 | 49.6 | 50.4 | 1680 | 19.5 | 25.5 | 32.2 | 22.7 | 51.7 | 48.3 | NC 056957 |               |
| <i>Oncorhynchus gilae apache</i>       | 947 | 19.5 | 27.7 | 30.0 | 22.8 | 49.5 | 50.5 | 1680 | 19.6 | 25.5 | 32.1 | 22.7 | 51.8 | 48.2 | MW300342  |               |
| <i>Oncorhynchus gorbuscha</i>          | 947 | 20.2 | 27.0 | 30.1 | 22.7 | 50.3 | 49.7 | 1678 | 19.7 | 25.1 | 32.4 | 22.8 | 52.1 | 47.9 | EF455489  |               |
| <i>Oncorhynchus gorbuscha</i>          | 947 | 20.2 | 27.0 | 30.1 | 22.7 | 50.3 | 49.7 | 1678 | 19.7 | 25.1 | 32.4 | 22.8 | 52.1 | 47.9 | NC 010959 |               |
| <i>Oncorhynchus keta</i>               | 946 | 20.1 | 27.4 | 29.6 | 22.9 | 49.7 | 50.3 | 1679 | 19.8 | 25.2 | 32.5 | 22.5 | 52.3 | 47.7 | AP010773  |               |
| <i>Oncorhynchus keta</i>               | 946 | 20.1 | 27.4 | 29.6 | 22.9 | 49.7 | 50.3 | 1679 | 19.8 | 25.2 | 32.5 | 22.5 | 52.3 | 47.7 | NC 017838 |               |
| <i>Oncorhynchus keta</i>               | 946 | 20.1 | 27.4 | 29.6 | 22.9 | 49.7 | 50.3 | 1677 | 19.9 | 25.2 | 32.5 | 22.5 | 52.4 | 47.6 | KY320492  |               |
| <i>Oncorhynchus kisutch</i>            | 947 | 19.9 | 27.3 | 29.7 | 23.1 | 49.5 | 50.5 | 1680 | 19.8 | 25.2 | 32.4 | 22.5 | 52.3 | 47.7 | MF621751  |               |
| <i>Oncorhynchus kisutch</i>            | 947 | 19.9 | 27.3 | 29.7 | 23.1 | 49.5 | 50.5 | 1680 | 19.8 | 25.2 | 32.5 | 22.4 | 52.3 | 47.7 | MH003640  |               |
| <i>Oncorhynchus kisutch</i>            | 947 | 19.9 | 27.3 | 29.7 | 23.1 | 49.5 | 50.5 | 1690 | 19.8 | 25.1 | 32.5 | 22.5 | 52.3 | 47.7 | EF126369  |               |
| <i>Oncorhynchus kisutch</i>            | 947 | 19.9 | 27.3 | 29.7 | 23.1 | 49.5 | 50.5 | 1680 | 19.8 | 25.2 | 32.5 | 22.4 | 52.3 | 47.7 | MF621749  |               |
| <i>Oncorhynchus kisutch</i>            | 947 | 19.9 | 27.3 | 29.7 | 23.1 | 49.5 | 50.5 | 1690 | 19.8 | 25.1 | 32.5 | 22.5 | 52.3 | 47.7 | NC 009263 |               |
| <i>Oncorhynchus masou biwa</i>         | 946 | 20.2 | 27.0 | 30.0 | 22.8 | 50.2 | 49.8 | 1679 | 19.7 | 25.0 | 33.1 | 22.2 | 52.8 | 47.2 | EF105342  |               |
| <i>Oncorhynchus masou biwa</i>         | 946 | 20.2 | 27.0 | 30.0 | 22.8 | 50.2 | 49.8 | 1679 | 19.7 | 25.0 | 33.1 | 22.2 | 52.8 | 47.2 | NC 009262 |               |
| <i>Oncorhynchus masou formosanus</i>   | 946 | 20.2 | 27.1 | 30.0 | 22.7 | 50.2 | 49.8 | 1679 | 19.6 | 25.1 | 33.0 | 22.3 | 52.6 | 47.4 | DQ858456  |               |
| <i>Oncorhynchus masou formosanus</i>   | 946 | 20.2 | 27.1 | 30.0 | 22.7 | 50.2 | 49.8 | 1679 | 19.6 | 25.1 | 33.0 | 22.3 | 52.6 | 47.4 | KU523579  |               |

|                                          |     |      |      |      |      |      |      |      |      |      |      |      |      |      |           |            |
|------------------------------------------|-----|------|------|------|------|------|------|------|------|------|------|------|------|------|-----------|------------|
| <i>Oncorhynchus masou formosanus</i>     | 946 | 20.2 | 27.1 | 30.0 | 22.7 | 50.2 | 49.8 | 1679 | 19.5 | 25.1 | 33.1 | 22.3 | 52.6 | 47.4 | KY250421  | this study |
| <i>Oncorhynchus masou formosanus</i>     | 946 | 20.2 | 27.1 | 30.0 | 22.7 | 50.2 | 49.8 | 1679 | 19.6 | 25.1 | 33.0 | 22.3 | 52.6 | 47.4 | NC 008745 |            |
| <i>Oncorhynchus masou ishikawae</i>      | 946 | 20.1 | 27.1 | 30.0 | 22.8 | 50.1 | 49.9 | 1679 | 19.6 | 25.1 | 32.9 | 22.3 | 52.5 | 47.5 | DQ864464  |            |
| <i>Oncorhynchus masou ishikawae</i>      | 946 | 20.1 | 27.1 | 30.0 | 22.8 | 50.1 | 49.9 | 1679 | 19.6 | 25.1 | 32.9 | 22.3 | 52.5 | 47.5 | NC 008746 |            |
| <i>Oncorhynchus masou masou</i>          | 946 | 20.3 | 26.8 | 30.2 | 22.6 | 50.5 | 49.5 | 1680 | 20.0 | 24.8 | 32.9 | 22.3 | 52.9 | 47.1 | KY320493  |            |
| <i>Oncorhynchus masou masou</i>          | 946 | 20.2 | 27.0 | 30.1 | 22.7 | 50.3 | 49.7 | 1679 | 19.6 | 25.1 | 32.9 | 22.3 | 52.5 | 47.5 | DQ864465  |            |
| <i>Oncorhynchus masou masou</i>          | 946 | 20.2 | 27.0 | 30.1 | 22.7 | 50.3 | 49.7 | 1679 | 19.6 | 25.1 | 32.9 | 22.3 | 52.5 | 47.5 | NC 008747 |            |
| <i>Oncorhynchus mykiss</i>               | 947 | 19.5 | 27.7 | 30.1 | 22.7 | 49.6 | 50.4 | 1680 | 19.4 | 25.7 | 32.1 | 22.7 | 51.5 | 48.5 | DQ288268  |            |
| <i>Oncorhynchus mykiss</i>               | 947 | 19.5 | 27.7 | 29.9 | 22.9 | 49.4 | 50.6 | 1680 | 19.5 | 25.7 | 32.2 | 22.7 | 51.7 | 48.3 | MF621750  |            |
| <i>Oncorhynchus mykiss</i>               | 944 | 19.6 | 27.4 | 30.2 | 22.8 | 49.8 | 50.2 | 1680 | 19.5 | 25.6 | 32.0 | 22.9 | 51.5 | 48.5 | NC 001717 |            |
| <i>Oncorhynchus mykiss</i>               | 947 | 19.5 | 27.7 | 30.0 | 22.8 | 49.5 | 50.5 | 1680 | 19.5 | 25.7 | 32.2 | 22.7 | 51.7 | 48.3 | DQ288269  |            |
| <i>Oncorhynchus mykiss</i>               | 947 | 19.5 | 27.7 | 30.0 | 22.8 | 49.5 | 50.5 | 1680 | 19.5 | 25.7 | 32.1 | 22.7 | 51.6 | 48.4 | DQ288270  |            |
| <i>Oncorhynchus mykiss</i>               | 947 | 19.5 | 27.7 | 30.0 | 22.8 | 49.5 | 50.5 | 1680 | 19.5 | 25.7 | 32.1 | 22.7 | 51.6 | 48.4 | DQ288271  |            |
| <i>Oncorhynchus mykiss</i>               | 947 | 19.5 | 27.7 | 30.0 | 22.8 | 49.5 | 50.5 | 1680 | 19.5 | 25.7 | 32.1 | 22.7 | 51.6 | 48.4 | KP013084  |            |
| <i>Oncorhynchus mykiss</i>               | 947 | 19.5 | 27.5 | 30.1 | 22.9 | 49.6 | 50.4 | 1680 | 19.5 | 25.7 | 32.0 | 22.8 | 51.5 | 48.5 | KP085590  |            |
| <i>Oncorhynchus mykiss</i>               | 946 | 19.7 | 27.6 | 29.9 | 22.8 | 49.6 | 50.4 | 1680 | 19.5 | 25.7 | 32.2 | 22.7 | 51.7 | 48.3 | MT410879  |            |
| <i>Oncorhynchus mykiss</i>               | 947 | 19.5 | 27.7 | 30.0 | 22.8 | 49.5 | 50.5 | 1680 | 19.5 | 25.7 | 32.1 | 22.7 | 51.6 | 48.4 | MT667254  |            |
| <i>Oncorhynchus mykiss</i>               | 944 | 19.6 | 27.4 | 30.2 | 22.8 | 49.8 | 50.2 | 1680 | 19.5 | 25.6 | 32.0 | 22.9 | 51.5 | 48.5 | L29771    |            |
| <i>Oncorhynchus mykiss nelsoni</i>       | 947 | 19.5 | 27.7 | 30.0 | 22.8 | 49.5 | 50.5 | 1658 | 19.5 | 25.6 | 32.1 | 22.7 | 51.6 | 48.4 | OP902891  |            |
| <i>Oncorhynchus mykiss x Salmo salar</i> | 948 | 19.4 | 27.5 | 30.1 | 23.0 | 49.5 | 50.5 | 1680 | 19.5 | 25.5 | 32.2 | 22.7 | 51.7 | 48.3 | KP218514  |            |
| <i>Oncorhynchus mykiss x Salmo salar</i> | 948 | 19.4 | 27.5 | 30.1 | 23.0 | 49.5 | 50.5 | 1680 | 19.5 | 25.5 | 32.2 | 22.7 | 51.7 | 48.3 | NC 026537 |            |
| <i>Oncorhynchus nerka</i>                | 947 | 20.1 | 27.1 | 29.6 | 23.2 | 49.6 | 50.4 | 1678 | 19.9 | 25.1 | 32.7 | 22.3 | 52.6 | 47.4 | EF055889  |            |
| <i>Oncorhynchus nerka</i>                | 947 | 20.1 | 27.1 | 29.6 | 23.2 | 49.6 | 50.4 | 1678 | 19.8 | 25.1 | 32.8 | 22.2 | 52.6 | 47.4 | MG993162  |            |
| <i>Oncorhynchus nerka</i>                | 947 | 20.1 | 27.1 | 29.6 | 23.2 | 49.6 | 50.4 | 1678 | 19.8 | 25.1 | 32.8 | 22.2 | 52.6 | 47.4 | MH003639  |            |
| <i>Oncorhynchus nerka</i>                | 947 | 20.1 | 27.1 | 29.6 | 23.2 | 49.6 | 50.4 | 1678 | 19.8 | 25.1 | 32.8 | 22.2 | 52.6 | 47.4 | MH003641  |            |
| <i>Oncorhynchus nerka</i>                | 947 | 20.1 | 27.1 | 29.6 | 23.2 | 49.6 | 50.4 | 1678 | 19.9 | 25.1 | 32.7 | 22.3 | 52.6 | 47.4 | NC 008615 |            |
| <i>Oncorhynchus tshawytscha</i>          | 947 | 20.3 | 27.1 | 29.9 | 22.7 | 50.2 | 49.8 | 1683 | 19.6 | 25.3 | 32.9 | 22.2 | 52.5 | 47.5 | AF392054  |            |
| <i>Oncorhynchus tshawytscha</i>          | 947 | 20.3 | 27.1 | 29.9 | 22.7 | 50.2 | 49.8 | 1683 | 19.6 | 25.3 | 32.9 | 22.2 | 52.5 | 47.5 | NC 002980 |            |
| <i>Parahucho perryi</i>                  | 947 | 20.0 | 27.3 | 29.6 | 23.1 | 49.5 | 50.5 | 1682 | 19.1 | 25.8 | 32.8 | 22.3 | 51.9 | 48.1 | KJ816316  |            |
| <i>Parahucho perryi</i>                  | 947 | 20.0 | 27.3 | 29.6 | 23.1 | 49.5 | 50.5 | 1678 | 19.2 | 25.7 | 32.8 | 22.2 | 52.0 | 48.0 | KC897653  |            |
| <i>Parahucho perryi</i>                  | 947 | 20.0 | 27.3 | 29.6 | 23.1 | 49.5 | 50.5 | 1683 | 19.1 | 25.8 | 32.7 | 22.3 | 51.9 | 48.1 | KJ816315  |            |
| <i>Parahucho perryi</i>                  | 947 | 20.0 | 27.3 | 29.6 | 23.1 | 49.5 | 50.5 | 1678 | 19.2 | 25.7 | 32.8 | 22.2 | 52.0 | 48.0 | NC 021651 |            |
| <i>Prosopium cylindraceum</i>            | 947 | 19.6 | 27.7 | 29.1 | 23.5 | 48.8 | 51.2 | 1679 | 19.7 | 25.0 | 32.2 | 23.1 | 51.9 | 48.1 | MF621767  |            |

|                                 |     |      |      |      |      |      |      |      |      |      |      |      |      |      |           |
|---------------------------------|-----|------|------|------|------|------|------|------|------|------|------|------|------|------|-----------|
| <i>Prosopium cylindraceum</i>   | 947 | 19.6 | 27.6 | 29.4 | 23.4 | 49.0 | 51.0 | 1679 | 19.7 | 25.0 | 32.2 | 23.2 | 51.9 | 48.1 | MF621768  |
| <i>Prosopium cylindraceum</i>   | 947 | 19.6 | 27.6 | 29.4 | 23.4 | 49.0 | 51.0 | 1679 | 19.7 | 25.0 | 32.2 | 23.2 | 51.9 | 48.1 | JQ390062  |
| <i>Prosopium cylindraceum</i>   | 947 | 19.6 | 27.6 | 29.4 | 23.4 | 49.0 | 51.0 | 1679 | 19.7 | 25.0 | 32.2 | 23.2 | 51.9 | 48.1 | MF621759  |
| <i>Prosopium cylindraceum</i>   | 947 | 19.6 | 27.7 | 29.1 | 23.5 | 48.8 | 51.2 | 1679 | 19.7 | 25.0 | 32.2 | 23.1 | 51.9 | 48.1 | MF621764  |
| <i>Prosopium cylindraceum</i>   | 947 | 19.6 | 27.6 | 29.4 | 23.4 | 49.0 | 51.0 | 1679 | 19.7 | 25.0 | 32.2 | 23.2 | 51.9 | 48.1 | NC 020764 |
| <i>Prosopium williamsoni</i>    | 947 | 19.9 | 27.2 | 29.5 | 23.4 | 49.3 | 50.7 | 1679 | 19.6 | 25.2 | 31.9 | 23.3 | 51.5 | 48.5 | JQ390061  |
| <i>Prosopium williamsoni</i>    | 947 | 19.9 | 27.2 | 29.5 | 23.4 | 49.3 | 50.7 | 1679 | 19.6 | 25.2 | 31.9 | 23.3 | 51.5 | 48.5 | NC 020763 |
| <i>Salmo caspius</i>            | 947 | 19.6 | 27.7 | 29.8 | 22.9 | 49.4 | 50.6 | 1661 | 19.7 | 25.3 | 32.3 | 22.6 | 52.1 | 47.9 | MT789707  |
| <i>Salmo caspius</i>            | 947 | 19.6 | 27.7 | 29.8 | 22.9 | 49.4 | 50.6 | 1661 | 19.7 | 25.3 | 32.3 | 22.6 | 52.1 | 47.9 | MT789708  |
| <i>Salmo caspius</i>            | 947 | 19.6 | 27.7 | 29.8 | 22.9 | 49.4 | 50.6 | 1661 | 19.7 | 25.3 | 32.3 | 22.6 | 52.1 | 47.9 | NC 058188 |
| <i>Salmo ischchan</i>           | 947 | 19.6 | 27.7 | 29.9 | 22.8 | 49.5 | 50.5 | 1681 | 19.8 | 25.4 | 32.4 | 22.5 | 52.1 | 47.9 | MG551590  |
| <i>Salmo ischchan</i>           | 947 | 19.6 | 27.7 | 29.8 | 22.9 | 49.4 | 50.6 | 1681 | 19.8 | 25.4 | 32.4 | 22.5 | 52.1 | 47.9 | MG599465  |
| <i>Salmo ischchan</i>           | 947 | 19.6 | 27.7 | 29.8 | 22.9 | 49.4 | 50.6 | 1681 | 19.8 | 25.4 | 32.4 | 22.5 | 52.1 | 47.9 | MG940849  |
| <i>Salmo ischchan</i>           | 947 | 19.6 | 27.7 | 29.9 | 22.8 | 49.5 | 50.5 | 1681 | 19.8 | 25.4 | 32.4 | 22.4 | 52.2 | 47.8 | MG940850  |
| <i>Salmo ischchan</i>           | 947 | 19.6 | 27.7 | 29.8 | 22.9 | 49.4 | 50.6 | 1681 | 19.8 | 25.4 | 32.4 | 22.5 | 52.1 | 47.9 | NC 037399 |
| <i>Salmo ischchan</i>           | 947 | 19.6 | 27.7 | 30.0 | 22.7 | 49.6 | 50.4 | 1681 | 19.8 | 25.4 | 32.3 | 22.5 | 52.1 | 47.9 | MG551591  |
| <i>Salmo ischchan</i>           | 947 | 19.6 | 27.7 | 29.9 | 22.8 | 49.5 | 50.5 | 1681 | 19.8 | 25.4 | 32.4 | 22.4 | 52.2 | 47.8 | MG599466  |
| <i>Salmo ischchan gegarkuni</i> | 947 | 19.6 | 27.7 | 29.9 | 22.8 | 49.5 | 50.5 | 1679 | 19.7 | 25.4 | 32.3 | 22.5 | 52.1 | 47.9 | MG551588  |
| <i>Salmo ischchan gegarkuni</i> | 947 | 19.6 | 27.7 | 29.9 | 22.8 | 49.5 | 50.5 | 1681 | 19.8 | 25.4 | 32.4 | 22.4 | 52.2 | 47.8 | MG551589  |
| <i>Salmo ischchan gegarkuni</i> | 947 | 19.6 | 27.7 | 29.9 | 22.8 | 49.5 | 50.5 | 1681 | 19.8 | 25.4 | 32.4 | 22.4 | 52.2 | 47.8 | MG940853  |
| <i>Salmo ischchan gegarkuni</i> | 947 | 19.6 | 27.7 | 29.9 | 22.8 | 49.5 | 50.5 | 1661 | 19.8 | 25.3 | 32.3 | 22.6 | 52.1 | 47.9 | MT789703  |
| <i>Salmo ischchan gegarkuni</i> | 947 | 19.6 | 27.7 | 29.9 | 22.8 | 49.5 | 50.5 | 1661 | 19.8 | 25.3 | 32.5 | 22.5 | 52.3 | 47.7 | MT789704  |
| <i>Salmo obtusirostris</i>      | 947 | 19.7 | 27.6 | 29.6 | 23.1 | 49.3 | 50.7 | 1681 | 19.8 | 25.4 | 32.5 | 22.4 | 52.2 | 47.8 | NC 037939 |
| <i>Salmo salar</i>              | 947 | 19.9 | 27.3 | 30.4 | 22.4 | 50.3 | 49.7 | 1679 | 19.5 | 25.6 | 32.9 | 22.0 | 52.5 | 47.5 | AF133701  |
| <i>Salmo salar</i>              | 947 | 19.9 | 27.2 | 30.4 | 22.5 | 50.3 | 49.7 | 1682 | 19.4 | 25.4 | 32.9 | 22.2 | 52.3 | 47.7 | JQ390055  |
| <i>Salmo salar</i>              | 947 | 20.0 | 27.3 | 30.5 | 22.2 | 50.5 | 49.5 | 1682 | 19.5 | 25.5 | 32.9 | 22.1 | 52.4 | 47.6 | JQ390056  |
| <i>Salmo salar</i>              | 947 | 19.9 | 27.3 | 30.4 | 22.4 | 50.3 | 49.7 | 1682 | 19.5 | 25.5 | 32.9 | 22.1 | 52.4 | 47.6 | KF792729  |
| <i>Salmo salar</i>              | 946 | 19.9 | 27.3 | 30.4 | 22.4 | 50.3 | 49.7 | 1678 | 19.5 | 25.4 | 33.0 | 22.1 | 52.5 | 47.5 | NC 001960 |
| <i>Salmo salar</i>              | 946 | 19.9 | 27.3 | 30.4 | 22.4 | 50.3 | 49.7 | 1678 | 19.5 | 25.4 | 33.0 | 22.1 | 52.5 | 47.5 | U12143    |
| <i>Salmo trutta</i>             | 947 | 19.7 | 27.6 | 29.9 | 22.8 | 49.6 | 50.4 | 1681 | 19.7 | 25.5 | 32.6 | 22.2 | 52.3 | 47.7 | JQ390057  |
| <i>Salmo trutta</i>             | 947 | 19.7 | 27.6 | 29.9 | 22.8 | 49.6 | 50.4 | 1681 | 19.8 | 25.4 | 32.6 | 22.2 | 52.3 | 47.7 | MF621760  |
| <i>Salmo trutta</i>             | 947 | 19.7 | 27.6 | 29.9 | 22.8 | 49.6 | 50.4 | 1681 | 19.7 | 25.5 | 32.6 | 22.2 | 52.3 | 47.7 | MF621761  |
| <i>Salmo trutta</i>             | 947 | 19.7 | 27.6 | 29.9 | 22.8 | 49.6 | 50.4 | 1681 | 19.8 | 25.4 | 32.6 | 22.2 | 52.3 | 47.7 | MF621762  |
| <i>Salmo trutta</i>             | 947 | 19.7 | 27.6 | 29.9 | 22.8 | 49.6 | 50.4 | 1681 | 19.7 | 25.5 | 32.5 | 22.3 | 52.2 | 47.8 | MF621763  |

|                            |     |      |      |      |      |      |      |      |      |      |      |      |      |      |           |
|----------------------------|-----|------|------|------|------|------|------|------|------|------|------|------|------|------|-----------|
| <i>Salmo trutta</i>        | 947 | 19.7 | 27.6 | 29.9 | 22.8 | 49.6 | 50.4 | 1681 | 19.7 | 25.5 | 32.6 | 22.2 | 52.3 | 47.7 | NC 024032 |
| <i>Salmo trutta fario</i>  | 947 | 19.5 | 27.8 | 29.8 | 22.9 | 49.3 | 50.7 | 1681 | 19.7 | 25.5 | 32.3 | 22.5 | 52.0 | 48.0 | KP171723  |
| <i>Salmo trutta fario</i>  | 947 | 19.7 | 27.6 | 29.9 | 22.8 | 49.6 | 50.4 | 1681 | 19.7 | 25.5 | 32.6 | 22.2 | 52.3 | 47.7 | KT633607  |
| <i>Salmo trutta fario</i>  | 947 | 19.6 | 27.7 | 29.8 | 22.9 | 49.4 | 50.6 | 1682 | 19.7 | 25.4 | 32.3 | 22.5 | 52.0 | 48.0 | KT634053  |
| <i>Salmo trutta fario</i>  | 947 | 19.6 | 27.7 | 29.9 | 22.8 | 49.5 | 50.5 | 1661 | 19.8 | 25.3 | 32.4 | 22.5 | 52.2 | 47.8 | MT789706  |
| <i>Salmo trutta fario</i>  | 947 | 19.6 | 27.7 | 29.8 | 22.9 | 49.4 | 50.6 | 1661 | 19.7 | 25.3 | 32.3 | 22.6 | 52.1 | 47.9 | MT789705  |
| <i>Salmo trutta trutta</i> | 947 | 19.7 | 27.6 | 29.9 | 22.8 | 49.6 | 50.4 | 1682 | 19.7 | 25.4 | 32.7 | 22.2 | 52.4 | 47.6 | NC 010007 |
| <i>Salvelinus albus</i>    | 947 | 20.1 | 27.0 | 30.0 | 22.9 | 50.1 | 49.9 | 1679 | 19.4 | 25.4 | 32.6 | 22.6 | 52.0 | 48.0 | KT266871  |
| <i>Salvelinus albus</i>    | 947 | 20.1 | 27.0 | 30.0 | 22.9 | 50.1 | 49.9 | 1679 | 19.4 | 25.4 | 32.6 | 22.6 | 52.0 | 48.0 | NC 028018 |
| <i>Salvelinus albus</i>    | 947 | 20.1 | 27.0 | 30.0 | 22.9 | 50.1 | 49.9 | 1679 | 19.4 | 25.4 | 32.6 | 22.6 | 52.0 | 48.0 | KT266870  |
| <i>Salvelinus alpinus</i>  | 947 | 20.0 | 27.0 | 29.9 | 23.1 | 49.8 | 50.2 | 1689 | 19.2 | 25.5 | 32.7 | 22.6 | 51.9 | 48.1 | MF621740  |
| <i>Salvelinus alpinus</i>  | 947 | 20.0 | 27.1 | 29.8 | 23.1 | 49.7 | 50.3 | 1679 | 19.4 | 25.4 | 32.7 | 22.5 | 52.1 | 47.9 | MT880631  |
| <i>Salvelinus alpinus</i>  | 947 | 20.0 | 27.1 | 29.8 | 23.1 | 49.7 | 50.3 | 1679 | 19.4 | 25.4 | 32.7 | 22.5 | 52.1 | 47.9 | MT880632  |
| <i>Salvelinus alpinus</i>  | 947 | 20.0 | 27.1 | 29.9 | 23.0 | 49.8 | 50.2 | 1679 | 19.4 | 25.4 | 32.7 | 22.5 | 52.1 | 47.9 | MT880633  |
| <i>Salvelinus alpinus</i>  | 947 | 20.0 | 27.0 | 29.9 | 23.1 | 49.8 | 50.2 | 1679 | 19.2 | 25.6 | 32.8 | 22.5 | 52.0 | 48.0 | MT880635  |
| <i>Salvelinus alpinus</i>  | 947 | 20.0 | 27.1 | 29.8 | 23.1 | 49.7 | 50.3 | 1679 | 19.4 | 25.4 | 32.7 | 22.5 | 52.1 | 47.9 | MT880638  |
| <i>Salvelinus alpinus</i>  | 947 | 20.0 | 27.0 | 29.9 | 23.1 | 49.8 | 50.2 | 1679 | 19.2 | 25.6 | 32.8 | 22.5 | 51.9 | 48.1 | MT880641  |
| <i>Salvelinus alpinus</i>  | 947 | 20.0 | 27.0 | 29.9 | 23.1 | 49.8 | 50.2 | 1679 | 19.2 | 25.6 | 32.8 | 22.5 | 52.0 | 48.0 | MT880642  |
| <i>Salvelinus alpinus</i>  | 947 | 20.0 | 27.0 | 29.9 | 23.1 | 49.8 | 50.2 | 1679 | 19.2 | 25.6 | 32.8 | 22.5 | 51.9 | 48.1 | MT880643  |
| <i>Salvelinus alpinus</i>  | 947 | 20.0 | 27.0 | 29.9 | 23.1 | 49.8 | 50.2 | 1679 | 19.2 | 25.6 | 32.8 | 22.5 | 51.9 | 48.1 | MT880644  |
| <i>Salvelinus alpinus</i>  | 947 | 20.0 | 27.0 | 29.9 | 23.1 | 49.8 | 50.2 | 1679 | 19.2 | 25.6 | 32.8 | 22.5 | 51.9 | 48.1 | MT880645  |
| <i>Salvelinus alpinus</i>  | 947 | 20.0 | 27.0 | 29.9 | 23.1 | 49.8 | 50.2 | 1679 | 19.2 | 25.6 | 32.8 | 22.5 | 51.9 | 48.1 | MT880646  |
| <i>Salvelinus alpinus</i>  | 947 | 20.0 | 27.0 | 29.9 | 23.1 | 49.8 | 50.2 | 1679 | 19.2 | 25.6 | 32.8 | 22.5 | 51.9 | 48.1 | MT880648  |
| <i>Salvelinus alpinus</i>  | 947 | 20.0 | 27.0 | 29.9 | 23.1 | 49.8 | 50.2 | 1679 | 19.2 | 25.6 | 32.8 | 22.5 | 52.0 | 48.0 | MT880649  |
| <i>Salvelinus alpinus</i>  | 947 | 20.0 | 27.0 | 29.9 | 23.1 | 49.8 | 50.2 | 1679 | 19.2 | 25.6 | 32.8 | 22.5 | 52.0 | 48.0 | MT880650  |
| <i>Salvelinus alpinus</i>  | 947 | 20.0 | 27.0 | 29.9 | 23.1 | 49.8 | 50.2 | 1679 | 19.2 | 25.6 | 32.8 | 22.5 | 52.0 | 48.0 | MT880652  |
| <i>Salvelinus alpinus</i>  | 947 | 20.0 | 27.0 | 29.9 | 23.1 | 49.8 | 50.2 | 1679 | 19.2 | 25.6 | 32.8 | 22.5 | 52.0 | 48.0 | MT880654  |
| <i>Salvelinus alpinus</i>  | 947 | 20.0 | 27.0 | 29.9 | 23.1 | 49.8 | 50.2 | 1679 | 19.2 | 25.6 | 32.8 | 22.5 | 52.0 | 48.0 | MT880655  |
| <i>Salvelinus alpinus</i>  | 947 | 20.0 | 27.0 | 29.9 | 23.1 | 49.8 | 50.2 | 1679 | 19.2 | 25.6 | 32.8 | 22.5 | 52.0 | 48.0 | MT880656  |
| <i>Salvelinus alpinus</i>  | 947 | 20.0 | 27.0 | 29.9 | 23.1 | 49.8 | 50.2 | 1679 | 19.2 | 25.6 | 32.8 | 22.5 | 52.0 | 48.0 | MT880657  |
| <i>Salvelinus alpinus</i>  | 947 | 20.0 | 27.0 | 29.9 | 23.1 | 49.8 | 50.2 | 1679 | 19.2 | 25.6 | 32.8 | 22.5 | 52.0 | 48.0 | MT880658  |
| <i>Salvelinus alpinus</i>  | 947 | 20.0 | 27.1 | 29.8 | 23.1 | 49.7 | 50.3 | 1679 | 19.4 | 25.4 | 32.7 | 22.5 | 52.1 | 47.9 | MT880660  |
| <i>Salvelinus alpinus</i>  | 947 | 20.0 | 27.1 | 29.8 | 23.1 | 49.7 | 50.3 | 1679 | 19.4 | 25.4 | 32.7 | 22.5 | 52.1 | 47.9 | MT880661  |
| <i>Salvelinus alpinus</i>  | 947 | 20.0 | 27.1 | 29.8 | 23.1 | 49.7 | 50.3 | 1679 | 19.4 | 25.4 | 32.7 | 22.5 | 52.1 | 47.9 | MT880662  |



|                           |     |      |      |      |      |      |      |      |      |      |      |      |      |      |           |
|---------------------------|-----|------|------|------|------|------|------|------|------|------|------|------|------|------|-----------|
| <i>Salvelinus alpinus</i> | 947 | 20.0 | 27.0 | 29.9 | 23.1 | 49.8 | 50.2 | 1679 | 19.2 | 25.6 | 32.8 | 22.5 | 52.0 | 48.0 | MT880669  |
| <i>Salvelinus alpinus</i> | 947 | 20.0 | 27.0 | 29.9 | 23.1 | 49.8 | 50.2 | 1679 | 19.2 | 25.6 | 32.8 | 22.5 | 52.0 | 48.0 | MT880673  |
| <i>Salvelinus alpinus</i> | 947 | 20.0 | 27.0 | 29.9 | 23.1 | 49.8 | 50.2 | 1679 | 19.2 | 25.6 | 32.8 | 22.5 | 52.0 | 48.0 | MT880674  |
| <i>Salvelinus alpinus</i> | 947 | 20.0 | 27.0 | 30.0 | 23.0 | 49.9 | 50.1 | 1679 | 19.2 | 25.6 | 32.8 | 22.4 | 52.1 | 47.9 | MT880675  |
| <i>Salvelinus alpinus</i> | 947 | 20.0 | 27.0 | 29.9 | 23.1 | 49.8 | 50.2 | 1679 | 19.2 | 25.6 | 32.8 | 22.5 | 52.0 | 48.0 | MT880676  |
| <i>Salvelinus alpinus</i> | 947 | 20.0 | 27.0 | 29.9 | 23.1 | 49.8 | 50.2 | 1679 | 19.2 | 25.6 | 32.8 | 22.5 | 52.0 | 48.0 | MT880679  |
| <i>Salvelinus alpinus</i> | 947 | 20.0 | 27.1 | 29.8 | 23.1 | 49.7 | 50.3 | 1679 | 19.4 | 25.4 | 32.8 | 22.5 | 52.1 | 47.9 | MT880680  |
| <i>Salvelinus alpinus</i> | 947 | 20.0 | 27.0 | 29.9 | 23.1 | 49.8 | 50.2 | 1679 | 19.2 | 25.6 | 32.8 | 22.5 | 52.0 | 48.0 | MT880683  |
| <i>Salvelinus alpinus</i> | 947 | 20.0 | 27.1 | 29.8 | 23.1 | 49.7 | 50.3 | 1679 | 19.4 | 25.4 | 32.7 | 22.5 | 52.1 | 47.9 | MT880685  |
| <i>Salvelinus alpinus</i> | 947 | 20.0 | 27.0 | 29.9 | 23.1 | 49.8 | 50.2 | 1679 | 19.2 | 25.6 | 32.8 | 22.5 | 52.0 | 48.0 | MT880688  |
| <i>Salvelinus alpinus</i> | 947 | 20.0 | 27.0 | 29.9 | 23.1 | 49.8 | 50.2 | 1679 | 19.2 | 25.6 | 32.8 | 22.5 | 52.0 | 48.0 | MT880689  |
| <i>Salvelinus alpinus</i> | 947 | 20.0 | 27.0 | 29.9 | 23.1 | 49.8 | 50.2 | 1679 | 19.2 | 25.6 | 32.8 | 22.5 | 52.0 | 48.0 | MT880690  |
| <i>Salvelinus alpinus</i> | 947 | 20.0 | 27.1 | 29.8 | 23.1 | 49.7 | 50.3 | 1679 | 19.4 | 25.4 | 32.7 | 22.5 | 52.1 | 47.9 | MT880691  |
| <i>Salvelinus alpinus</i> | 947 | 20.0 | 27.0 | 29.9 | 23.1 | 49.8 | 50.2 | 1679 | 19.2 | 25.6 | 32.9 | 22.3 | 52.1 | 47.9 | MT880692  |
| <i>Salvelinus alpinus</i> | 947 | 20.0 | 27.0 | 29.9 | 23.1 | 49.8 | 50.2 | 1679 | 19.2 | 25.6 | 32.8 | 22.5 | 52.0 | 48.0 | MT880699  |
| <i>Salvelinus alpinus</i> | 947 | 20.0 | 27.0 | 29.9 | 23.1 | 49.8 | 50.2 | 1679 | 19.2 | 25.6 | 32.8 | 22.5 | 52.0 | 48.0 | MT880700  |
| <i>Salvelinus alpinus</i> | 947 | 20.0 | 27.0 | 29.9 | 23.1 | 49.8 | 50.2 | 1679 | 19.2 | 25.6 | 32.8 | 22.5 | 52.0 | 48.0 | MT880702  |
| <i>Salvelinus alpinus</i> | 947 | 20.0 | 27.0 | 29.9 | 23.1 | 49.8 | 50.2 | 1679 | 19.2 | 25.6 | 32.8 | 22.5 | 52.0 | 48.0 | MT880703  |
| <i>Salvelinus alpinus</i> | 947 | 20.0 | 27.0 | 29.9 | 23.1 | 49.8 | 50.2 | 1679 | 19.2 | 25.6 | 32.8 | 22.5 | 52.0 | 48.0 | MT880705  |
| <i>Salvelinus alpinus</i> | 947 | 20.0 | 27.1 | 29.8 | 23.1 | 49.7 | 50.3 | 1679 | 19.4 | 25.4 | 32.7 | 22.5 | 52.1 | 47.9 | MT880708  |
| <i>Salvelinus alpinus</i> | 947 | 20.0 | 27.1 | 29.8 | 23.1 | 49.7 | 50.3 | 1679 | 19.4 | 25.4 | 32.8 | 22.5 | 52.1 | 47.9 | MT880710  |
| <i>Salvelinus alpinus</i> | 947 | 20.0 | 27.1 | 29.8 | 23.1 | 49.7 | 50.3 | 1679 | 19.4 | 25.4 | 32.7 | 22.5 | 52.1 | 47.9 | MT880711  |
| <i>Salvelinus alpinus</i> | 947 | 20.0 | 27.1 | 29.8 | 23.1 | 49.7 | 50.3 | 1679 | 19.4 | 25.4 | 32.8 | 22.5 | 52.1 | 47.9 | MT880714  |
| <i>Salvelinus alpinus</i> | 947 | 20.0 | 27.1 | 29.8 | 23.1 | 49.7 | 50.3 | 1679 | 19.4 | 25.4 | 32.8 | 22.5 | 52.1 | 47.9 | MT880720  |
| <i>Salvelinus alpinus</i> | 947 | 20.0 | 27.1 | 29.9 | 23.0 | 49.8 | 50.2 | 1679 | 19.4 | 25.4 | 32.7 | 22.5 | 52.1 | 47.9 | MT880721  |
| <i>Salvelinus alpinus</i> | 947 | 20.0 | 27.1 | 29.8 | 23.1 | 49.7 | 50.3 | 1680 | 19.3 | 25.5 | 32.7 | 22.5 | 52.0 | 48.0 | NC 000861 |
| <i>Salvelinus alpinus</i> | 947 | 20.0 | 27.1 | 29.8 | 23.1 | 49.7 | 50.3 | 1680 | 19.3 | 25.5 | 32.7 | 22.5 | 52.0 | 48.0 | AF154851  |
| <i>Salvelinus alpinus</i> | 947 | 20.0 | 27.0 | 29.9 | 23.1 | 49.8 | 50.2 | 1689 | 19.2 | 25.5 | 32.7 | 22.6 | 51.9 | 48.1 | MF621741  |
| <i>Salvelinus alpinus</i> | 947 | 20.2 | 26.9 | 29.9 | 23.0 | 50.1 | 49.9 | 1689 | 19.4 | 25.3 | 32.6 | 22.7 | 51.9 | 48.1 | MF621743  |
| <i>Salvelinus alpinus</i> | 947 | 20.0 | 27.0 | 29.9 | 23.1 | 49.8 | 50.2 | 1679 | 19.3 | 25.5 | 32.8 | 22.5 | 52.1 | 47.9 | MN530962  |
| <i>Salvelinus alpinus</i> | 947 | 20.0 | 27.0 | 29.9 | 23.1 | 49.8 | 50.2 | 1679 | 19.2 | 25.6 | 32.8 | 22.5 | 52.0 | 48.0 | MN530963  |
| <i>Salvelinus alpinus</i> | 947 | 20.0 | 27.1 | 29.8 | 23.1 | 49.7 | 50.3 | 1679 | 19.4 | 25.4 | 32.7 | 22.5 | 52.1 | 47.9 | MT880634  |
| <i>Salvelinus alpinus</i> | 947 | 20.0 | 27.1 | 29.8 | 23.1 | 49.7 | 50.3 | 1679 | 19.4 | 25.4 | 32.7 | 22.5 | 52.1 | 47.9 | MT880636  |
| <i>Salvelinus alpinus</i> | 947 | 20.0 | 27.0 | 29.9 | 23.1 | 49.8 | 50.2 | 1679 | 19.2 | 25.6 | 32.8 | 22.5 | 52.0 | 48.0 | MT880637  |

[illegible]

|                                                        |     |      |      |      |      |      |      |      |      |      |      |      |      |      |           |
|--------------------------------------------------------|-----|------|------|------|------|------|------|------|------|------|------|------|------|------|-----------|
| <i>Salvelinus alpinus</i>                              | 947 | 20.0 | 27.1 | 29.8 | 23.1 | 49.7 | 50.3 | 1679 | 19.4 | 25.4 | 32.7 | 22.5 | 52.1 | 47.9 | MT880713  |
| <i>Salvelinus alpinus</i>                              | 947 | 20.0 | 27.1 | 29.8 | 23.1 | 49.7 | 50.3 | 1679 | 19.4 | 25.4 | 32.7 | 22.5 | 52.1 | 47.9 | MT880715  |
| <i>Salvelinus alpinus</i>                              | 947 | 20.0 | 27.1 | 29.9 | 23.0 | 49.8 | 50.2 | 1679 | 19.3 | 25.4 | 32.8 | 22.5 | 52.1 | 47.9 | MT880716  |
| <i>Salvelinus alpinus</i>                              | 947 | 20.0 | 27.1 | 29.8 | 23.1 | 49.7 | 50.3 | 1679 | 19.4 | 25.4 | 32.8 | 22.5 | 52.1 | 47.9 | MT880717  |
| <i>Salvelinus alpinus</i>                              | 947 | 20.0 | 27.1 | 29.8 | 23.1 | 49.7 | 50.3 | 1679 | 19.4 | 25.4 | 32.8 | 22.5 | 52.1 | 47.9 | MT880718  |
| <i>Salvelinus alpinus</i>                              | 947 | 20.0 | 27.1 | 29.8 | 23.1 | 49.7 | 50.3 | 1679 | 19.4 | 25.4 | 32.8 | 22.5 | 52.1 | 47.9 | MT880719  |
| <i>Salvelinus alpinus</i>                              | 947 | 20.0 | 27.1 | 29.9 | 23.0 | 49.8 | 50.2 | 1679 | 19.3 | 25.4 | 32.8 | 22.5 | 52.1 | 47.9 | MT880722  |
| <i>Salvelinus alpinus</i>                              | 947 | 20.0 | 27.1 | 29.9 | 23.0 | 49.8 | 50.2 | 1679 | 19.4 | 25.4 | 32.8 | 22.5 | 52.1 | 47.9 | MT880723  |
| <i>Salvelinus alpinus</i>                              | 947 | 20.0 | 27.1 | 29.8 | 23.1 | 49.7 | 50.3 | 1679 | 19.3 | 25.5 | 32.7 | 22.5 | 52.0 | 48.0 | MT880724  |
| <i>Salvelinus alpinus alpinus</i>                      | 947 | 20.0 | 27.1 | 29.8 | 23.1 | 49.7 | 50.3 | 1679 | 19.4 | 25.4 | 32.7 | 22.5 | 52.1 | 47.9 | MN957796  |
| <i>Salvelinus alpinus alpinus</i>                      | 947 | 20.0 | 27.1 | 29.8 | 23.1 | 49.7 | 50.3 | 1679 | 19.4 | 25.4 | 32.7 | 22.5 | 52.1 | 47.9 | MN957795  |
| <i>Salvelinus alpinus alpinus</i>                      | 947 | 20.0 | 27.1 | 29.8 | 23.1 | 49.7 | 50.3 | 1679 | 19.4 | 25.4 | 32.7 | 22.5 | 52.1 | 47.9 | MN957797  |
| <i>Salvelinus alpinus erythrinus</i>                   | 947 | 20.0 | 27.0 | 29.9 | 23.1 | 49.8 | 50.2 | 1679 | 19.2 | 25.6 | 32.8 | 22.5 | 52.0 | 48.0 | MW664921  |
| <i>Salvelinus alpinus erythrinus</i>                   | 947 | 20.0 | 27.0 | 29.9 | 23.1 | 49.8 | 50.2 | 1679 | 19.2 | 25.6 | 32.8 | 22.5 | 52.0 | 48.0 | MW664922  |
| <i>Salvelinus boganidae</i>                            | 947 | 20.0 | 27.0 | 29.9 | 23.1 | 49.8 | 50.2 | 1679 | 19.2 | 25.6 | 32.6 | 22.6 | 51.9 | 48.1 | NC 046706 |
| <i>Salvelinus boganidae</i>                            | 947 | 20.0 | 27.0 | 29.9 | 23.1 | 49.8 | 50.2 | 1679 | 19.2 | 25.6 | 32.6 | 22.6 | 51.9 | 48.1 | MK695623  |
| <i>Salvelinus curilus</i>                              | 947 | 19.9 | 27.2 | 29.9 | 23.0 | 49.7 | 50.3 | 1679 | 19.2 | 25.6 | 32.5 | 22.7 | 51.8 | 48.2 | KJ746619  |
| <i>Salvelinus curilus</i>                              | 947 | 19.9 | 27.2 | 29.9 | 23.0 | 49.7 | 50.3 | 1679 | 19.2 | 25.6 | 32.5 | 22.7 | 51.8 | 48.2 | NC 024585 |
| <i>Salvelinus elgyticus</i>                            | 947 | 20.0 | 27.0 | 29.9 | 23.1 | 49.8 | 50.2 | 1679 | 19.2 | 25.6 | 32.6 | 22.6 | 51.9 | 48.1 | MK695624  |
| <i>Salvelinus elgyticus</i>                            | 947 | 20.0 | 27.0 | 29.9 | 23.1 | 49.8 | 50.2 | 1679 | 19.2 | 25.6 | 32.6 | 22.6 | 51.9 | 48.1 | NC 046707 |
| <i>Salvelinus elgyticus</i>                            | 947 | 19.7 | 27.2 | 30.0 | 23.0 | 49.7 | 50.3 | 1679 | 19.2 | 25.6 | 32.6 | 22.6 | 51.9 | 48.1 | MK695625  |
| <i>Salvelinus fontinalis</i>                           | 947 | 20.1 | 27.0 | 30.2 | 22.7 | 50.3 | 49.7 | 1680 | 19.3 | 25.2 | 33.0 | 22.5 | 52.3 | 47.7 | AF154850  |
| <i>Salvelinus fontinalis</i>                           | 947 | 20.1 | 27.0 | 30.3 | 22.6 | 50.4 | 49.6 | 1689 | 19.3 | 25.1 | 32.8 | 22.8 | 52.1 | 47.9 | MF621737  |
| <i>Salvelinus fontinalis</i>                           | 947 | 20.1 | 27.0 | 30.2 | 22.7 | 50.3 | 49.7 | 1689 | 19.3 | 25.1 | 33.0 | 22.6 | 52.3 | 47.7 | MF621739  |
| <i>Salvelinus fontinalis</i>                           | 947 | 20.1 | 27.0 | 30.2 | 22.7 | 50.3 | 49.7 | 1680 | 19.3 | 25.2 | 33.0 | 22.5 | 52.3 | 47.7 | NC 000860 |
| <i>Salvelinus fontinalis</i>                           | 947 | 20.1 | 27.0 | 30.2 | 22.7 | 50.3 | 49.7 | 1689 | 19.3 | 25.1 | 33.0 | 22.6 | 52.3 | 47.7 | MF621738  |
| <i>Salvelinus fontinalis</i> x <i>Salvelinus malma</i> | 947 | 20.1 | 27.0 | 30.2 | 22.7 | 50.3 | 49.7 | 1689 | 19.1 | 25.4 | 32.9 | 22.6 | 52.0 | 48.0 | MK270623  |
| <i>Salvelinus fontinalis</i> x <i>Salvelinus malma</i> | 947 | 20.1 | 27.0 | 30.2 | 22.7 | 50.3 | 49.7 | 1689 | 19.1 | 25.4 | 32.9 | 22.6 | 52.0 | 48.0 | NC 042195 |
| <i>Salvelinus kuznetzovi</i>                           | 947 | 20.1 | 27.0 | 29.9 | 23.0 | 49.9 | 50.1 | 1679 | 19.4 | 25.4 | 32.6 | 22.6 | 51.9 | 48.1 | KU674352  |
| <i>Salvelinus kuznetzovi</i>                           | 947 | 20.1 | 27.0 | 29.9 | 23.0 | 49.9 | 50.1 | 1679 | 19.4 | 25.4 | 32.6 | 22.6 | 51.9 | 48.1 | KU674351  |
| <i>Salvelinus kuznetzovi</i>                           | 947 | 20.1 | 27.0 | 29.9 | 23.0 | 49.9 | 50.1 | 1679 | 19.4 | 25.4 | 32.6 | 22.6 | 51.9 | 48.1 | NC 029877 |
| <i>Salvelinus leucomaenis</i>                          | 947 | 20.1 | 27.0 | 30.2 | 22.7 | 50.3 | 49.7 | 1679 | 19.3 | 25.2 | 33.0 | 22.5 | 52.3 | 47.7 | KF513161  |
| <i>Salvelinus leucomaenis</i>                          | 947 | 20.1 | 27.0 | 30.0 | 22.9 | 50.1 | 49.9 | 1679 | 19.2 | 25.6 | 32.7 | 22.5 | 51.9 | 48.1 | KF974451  |

|                                |     |      |      |      |      |      |      |      |      |      |      |      |      |      |           |
|--------------------------------|-----|------|------|------|------|------|------|------|------|------|------|------|------|------|-----------|
| <i>Salvelinus leucomaenis</i>  | 947 | 20.0 | 27.1 | 29.9 | 23.0 | 49.8 | 50.2 | 1679 | 19.2 | 25.6 | 32.8 | 22.5 | 52.0 | 48.0 | KF974452  |
| <i>Salvelinus leucomaenis</i>  | 947 | 20.1 | 27.0 | 30.0 | 22.9 | 50.1 | 49.9 | 1679 | 19.2 | 25.6 | 32.7 | 22.5 | 51.9 | 48.1 | MN972433  |
| <i>Salvelinus leucomaenis</i>  | 947 | 20.1 | 27.0 | 30.0 | 22.9 | 50.1 | 49.9 | 1679 | 19.2 | 25.6 | 32.7 | 22.5 | 51.9 | 48.1 | MN972434  |
| <i>Salvelinus leucomaenis</i>  | 947 | 20.1 | 27.0 | 30.0 | 22.9 | 50.1 | 49.9 | 1679 | 19.2 | 25.6 | 32.7 | 22.5 | 51.9 | 48.1 | MN972435  |
| <i>Salvelinus leucomaenis</i>  | 947 | 20.1 | 27.0 | 30.2 | 22.7 | 50.3 | 49.7 | 1679 | 19.3 | 25.2 | 33.0 | 22.5 | 52.3 | 47.7 | NC 022844 |
| <i>Salvelinus levanidovi</i>   | 947 | 20.0 | 27.1 | 29.9 | 23.0 | 49.8 | 50.2 | 1679 | 19.2 | 25.5 | 32.9 | 22.4 | 52.1 | 47.9 | MK695626  |
| <i>Salvelinus levanidovi</i>   | 947 | 20.0 | 27.1 | 29.9 | 23.0 | 49.8 | 50.2 | 1679 | 19.2 | 25.5 | 32.9 | 22.4 | 52.1 | 47.9 | NC 046708 |
| <i>Salvelinus malma</i>        | 947 | 20.1 | 27.0 | 29.9 | 23.0 | 49.9 | 50.1 | 1679 | 19.4 | 25.4 | 32.6 | 22.6 | 52.0 | 48.0 | KJ746618  |
| <i>Salvelinus malma</i>        | 947 | 19.9 | 27.2 | 29.9 | 23.0 | 49.7 | 50.3 | 1679 | 19.3 | 25.5 | 32.7 | 22.5 | 52.0 | 48.0 | MF680544  |
| <i>Salvelinus malma</i>        | 947 | 20.1 | 27.0 | 29.9 | 23.0 | 49.9 | 50.1 | 1679 | 19.4 | 25.4 | 32.6 | 22.6 | 52.0 | 48.0 | MN530959  |
| <i>Salvelinus malma</i>        | 947 | 20.1 | 27.0 | 29.9 | 23.0 | 49.9 | 50.1 | 1679 | 19.4 | 25.4 | 32.6 | 22.6 | 52.0 | 48.0 | MN530960  |
| <i>Salvelinus malma</i>        | 947 | 20.1 | 27.0 | 29.9 | 23.0 | 49.9 | 50.1 | 1679 | 19.4 | 25.4 | 32.6 | 22.6 | 52.0 | 48.0 | MN530961  |
| <i>Salvelinus malma</i>        | 947 | 19.9 | 27.2 | 29.9 | 23.0 | 49.7 | 50.3 | 1679 | 19.3 | 25.5 | 32.7 | 22.5 | 52.0 | 48.0 | NC 037502 |
| <i>Salvelinus namaycush</i>    | 947 | 20.1 | 27.1 | 29.7 | 23.1 | 49.7 | 50.3 | 1689 | 19.2 | 25.5 | 32.6 | 22.7 | 51.9 | 48.1 | MF621745  |
| <i>Salvelinus namaycush</i>    | 948 | 20.1 | 27.1 | 29.5 | 23.2 | 49.7 | 50.3 | 1689 | 19.2 | 25.5 | 32.7 | 22.6 | 51.9 | 48.1 | MF621742  |
| <i>Salvelinus namaycush</i>    | 947 | 20.1 | 27.1 | 29.7 | 23.1 | 49.7 | 50.3 | 1689 | 19.2 | 25.5 | 32.6 | 22.7 | 51.9 | 48.1 | MF621744  |
| <i>Salvelinus namaycush</i>    | 948 | 20.1 | 27.1 | 29.6 | 23.1 | 49.8 | 50.2 | 1689 | 19.2 | 25.5 | 32.6 | 22.7 | 51.9 | 48.1 | MF621746  |
| <i>Salvelinus namaycush</i>    | 947 | 20.1 | 27.1 | 29.7 | 23.1 | 49.7 | 50.3 | 1689 | 19.2 | 25.5 | 32.7 | 22.6 | 51.9 | 48.1 | MF621747  |
| <i>Salvelinus namaycush</i>    | 948 | 20.1 | 27.1 | 29.6 | 23.1 | 49.8 | 50.2 | 1689 | 19.2 | 25.5 | 32.7 | 22.6 | 51.9 | 48.1 | MF621748  |
| <i>Salvelinus namaycush</i>    | 948 | 20.1 | 27.1 | 29.5 | 23.2 | 49.7 | 50.3 | 1689 | 19.2 | 25.5 | 32.7 | 22.6 | 51.9 | 48.1 | NC 036392 |
| <i>Salvelinus schmidt</i>      | 947 | 20.2 | 26.9 | 29.9 | 23.0 | 50.1 | 49.9 | 1679 | 19.4 | 25.4 | 32.6 | 22.6 | 52.0 | 48.0 | MW664923  |
| <i>Salvelinus schmidt</i>      | 947 | 20.2 | 26.9 | 29.9 | 23.0 | 50.1 | 49.9 | 1679 | 19.4 | 25.4 | 32.6 | 22.6 | 52.0 | 48.0 | MW664924  |
| <i>Salvelinus schmidt</i>      | 947 | 20.2 | 26.9 | 29.9 | 23.0 | 50.1 | 49.9 | 1679 | 19.4 | 25.4 | 32.6 | 22.6 | 52.0 | 48.0 | NC 059927 |
| <i>Salvelinus sp.</i>          | 947 | 20.0 | 27.0 | 30.0 | 23.0 | 49.9 | 50.1 | 1679 | 19.2 | 25.6 | 32.7 | 22.5 | 51.9 | 48.1 | MW181766  |
| <i>Salvelinus sp.</i>          | 947 | 20.0 | 27.0 | 29.9 | 23.1 | 49.8 | 50.2 | 1679 | 19.2 | 25.6 | 32.7 | 22.5 | 51.9 | 48.1 | MW181767  |
| <i>Salvelinus sp.</i>          | 947 | 20.0 | 27.0 | 30.0 | 23.0 | 49.9 | 50.1 | 1679 | 19.2 | 25.6 | 32.7 | 22.5 | 51.9 | 48.1 | MW181768  |
| <i>Salvelinus taranetzi</i>    | 947 | 20.0 | 27.0 | 29.9 | 23.1 | 49.8 | 50.2 | 1679 | 19.2 | 25.6 | 32.7 | 22.5 | 51.9 | 48.1 | MK695630  |
| <i>Salvelinus taranetzi</i>    | 947 | 20.0 | 27.0 | 30.0 | 23.0 | 49.9 | 50.1 | 1679 | 19.2 | 25.6 | 32.7 | 22.5 | 51.9 | 48.1 | MK695631  |
| <i>Salvelinus taranetzi</i>    | 947 | 20.0 | 27.0 | 29.9 | 23.1 | 49.8 | 50.2 | 1679 | 19.2 | 25.6 | 32.7 | 22.5 | 51.9 | 48.1 | NC 046710 |
| <i>Salvethymus svetovidovi</i> | 947 | 19.9 | 27.1 | 29.8 | 23.2 | 49.6 | 50.4 | 1680 | 19.3 | 25.5 | 32.5 | 22.6 | 51.8 | 48.2 | MK695628  |
| <i>Salvethymus svetovidovi</i> | 947 | 19.9 | 27.1 | 29.8 | 23.2 | 49.6 | 50.4 | 1680 | 19.3 | 25.5 | 32.5 | 22.6 | 51.8 | 48.2 | MK695629  |
| <i>Salvethymus svetovidovi</i> | 947 | 19.9 | 27.1 | 29.8 | 23.2 | 49.6 | 50.4 | 1680 | 19.3 | 25.5 | 32.5 | 22.6 | 51.8 | 48.2 | NC 046709 |
| <i>Salvethymus svetovidovi</i> | 947 | 19.9 | 27.1 | 29.8 | 23.2 | 49.6 | 50.4 | 1680 | 19.3 | 25.5 | 32.5 | 22.6 | 51.8 | 48.2 | MK695627  |
| <i>Stenodus leucichthys</i>    | 947 | 20.5 | 27.1 | 29.3 | 23.1 | 49.7 | 50.3 | 1679 | 19.4 | 25.6 | 31.7 | 23.3 | 51.0 | 49.0 | JQ390059  |

|                                  |     |      |      |      |      |      |      |      |      |      |      |      |      |      |           |
|----------------------------------|-----|------|------|------|------|------|------|------|------|------|------|------|------|------|-----------|
| <i>Stenodus leucichthys</i>      | 947 | 20.5 | 27.1 | 29.3 | 23.1 | 49.7 | 50.3 | 1679 | 19.4 | 25.6 | 31.7 | 23.3 | 51.0 | 49.0 | NC 020761 |
| <i>Thymallus aeliani</i>         | 946 | 20.1 | 27.3 | 29.4 | 23.3 | 49.5 | 50.5 | 1678 | 19.8 | 25.2 | 32.1 | 22.8 | 52.0 | 48.0 | MT063008  |
| <i>Thymallus aeliani</i>         | 946 | 20.1 | 27.3 | 29.4 | 23.3 | 49.5 | 50.5 | 1678 | 19.8 | 25.2 | 32.1 | 22.8 | 52.0 | 48.0 | MT063009  |
| <i>Thymallus aeliani</i>         | 946 | 20.1 | 27.3 | 29.4 | 23.3 | 49.5 | 50.5 | 1678 | 19.8 | 25.2 | 32.1 | 22.8 | 52.0 | 48.0 | NC 056304 |
| <i>Thymallus arcticus</i>        | 946 | 20.3 | 27.1 | 29.5 | 23.2 | 49.8 | 50.2 | 1679 | 19.9 | 25.2 | 32.2 | 22.8 | 52.1 | 47.9 | MF621754  |
| <i>Thymallus arcticus</i>        | 946 | 20.3 | 27.1 | 29.4 | 23.3 | 49.7 | 50.3 | 1679 | 19.9 | 25.2 | 32.2 | 22.7 | 52.1 | 47.9 | MF621755  |
| <i>Thymallus arcticus</i>        | 946 | 20.3 | 27.1 | 29.5 | 23.2 | 49.8 | 50.2 | 1679 | 19.9 | 25.2 | 32.2 | 22.8 | 52.1 | 47.9 | MF621758  |
| <i>Thymallus arcticus</i>        | 946 | 20.3 | 27.1 | 29.6 | 23.0 | 49.9 | 50.1 | 1679 | 20.0 | 25.2 | 32.2 | 22.6 | 52.2 | 47.8 | MT063011  |
| <i>Thymallus arcticus</i>        | 946 | 20.3 | 27.1 | 29.5 | 23.2 | 49.8 | 50.2 | 1679 | 20.0 | 25.1 | 32.3 | 22.6 | 52.3 | 47.7 | MT063014  |
| <i>Thymallus arcticus</i>        | 946 | 20.4 | 27.0 | 29.6 | 23.0 | 50.0 | 50.0 | 1679 | 20.0 | 25.1 | 32.2 | 22.7 | 52.2 | 47.8 | MT063015  |
| <i>Thymallus arcticus</i>        | 946 | 20.4 | 27.0 | 29.6 | 23.0 | 50.0 | 50.0 | 1679 | 20.0 | 25.1 | 32.3 | 22.6 | 52.4 | 47.6 | MT063017  |
| <i>Thymallus arcticus</i>        | 946 | 20.3 | 27.1 | 29.5 | 23.2 | 49.8 | 50.2 | 1680 | 19.7 | 25.3 | 32.1 | 22.9 | 51.8 | 48.2 | FJ872559  |
| <i>Thymallus arcticus</i>        | 946 | 20.2 | 27.2 | 29.7 | 22.9 | 49.9 | 50.1 | 1679 | 20.0 | 25.1 | 32.3 | 22.6 | 52.3 | 47.7 | KJ866481  |
| <i>Thymallus arcticus</i>        | 946 | 20.3 | 27.1 | 29.5 | 23.2 | 49.8 | 50.2 | 1679 | 19.9 | 25.2 | 32.1 | 22.8 | 52.0 | 48.0 | MF621752  |
| <i>Thymallus arcticus</i>        | 946 | 20.3 | 27.1 | 29.5 | 23.2 | 49.8 | 50.2 | 1679 | 19.9 | 25.2 | 32.2 | 22.8 | 52.1 | 47.9 | MF621753  |
| <i>Thymallus arcticus</i>        | 946 | 20.3 | 27.1 | 29.4 | 23.3 | 49.7 | 50.3 | 1679 | 19.9 | 25.2 | 32.2 | 22.7 | 52.1 | 47.9 | MF621756  |
| <i>Thymallus arcticus</i>        | 946 | 20.3 | 27.1 | 29.5 | 23.2 | 49.8 | 50.2 | 1679 | 19.9 | 25.2 | 32.2 | 22.8 | 52.1 | 47.9 | MF621757  |
| <i>Thymallus arcticus</i>        | 946 | 20.4 | 27.0 | 29.5 | 23.2 | 49.9 | 50.1 | 1680 | 19.9 | 25.2 | 32.2 | 22.6 | 52.1 | 47.9 | MT063010  |
| <i>Thymallus arcticus</i>        | 946 | 20.4 | 27.0 | 29.5 | 23.2 | 49.9 | 50.1 | 1679 | 20.0 | 25.1 | 32.3 | 22.5 | 52.4 | 47.6 | MT063012  |
| <i>Thymallus arcticus</i>        | 946 | 20.3 | 27.2 | 29.5 | 23.0 | 49.8 | 50.2 | 1679 | 20.0 | 25.1 | 32.3 | 22.6 | 52.3 | 47.7 | MT063013  |
| <i>Thymallus arcticus</i>        | 946 | 20.4 | 27.0 | 29.6 | 23.0 | 50.0 | 50.0 | 1679 | 20.0 | 25.1 | 32.3 | 22.6 | 52.3 | 47.7 | MT063016  |
| <i>Thymallus arcticus</i>        | 946 | 20.4 | 27.0 | 29.5 | 23.2 | 49.9 | 50.1 | 1680 | 19.9 | 25.2 | 32.2 | 22.6 | 52.1 | 47.9 | NC 056305 |
| <i>Thymallus baicalensis</i>     | 947 | 20.1 | 27.2 | 29.8 | 22.9 | 49.8 | 50.2 | 1679 | 19.8 | 25.1 | 32.4 | 22.7 | 52.2 | 47.8 | MT063022  |
| <i>Thymallus baicalensis</i>     | 947 | 20.1 | 27.2 | 29.8 | 22.9 | 49.8 | 50.2 | 1679 | 19.8 | 25.1 | 32.4 | 22.7 | 52.2 | 47.8 | MT063024  |
| <i>Thymallus baicalensis</i>     | 947 | 20.1 | 27.2 | 29.8 | 22.9 | 49.8 | 50.2 | 1679 | 19.8 | 25.1 | 32.4 | 22.7 | 52.2 | 47.8 | NC 056306 |
| <i>Thymallus baicalensis</i>     | 947 | 20.1 | 27.2 | 29.8 | 22.9 | 49.8 | 50.2 | 1679 | 19.8 | 25.0 | 32.5 | 22.7 | 52.3 | 47.7 | MT063023  |
| <i>Thymallus baicalensis</i>     | 947 | 20.1 | 27.2 | 29.7 | 23.0 | 49.7 | 50.3 | 1679 | 19.9 | 25.1 | 32.4 | 22.6 | 52.3 | 47.7 | MT063025  |
| <i>Thymallus baicalensis</i>     | 947 | 20.1 | 27.2 | 29.7 | 23.0 | 49.7 | 50.3 | 1678 | 19.9 | 25.0 | 32.5 | 22.6 | 52.4 | 47.6 | MT063026  |
| <i>Thymallus baicalensis</i>     | 947 | 20.1 | 27.2 | 29.8 | 22.9 | 49.8 | 50.2 | 1679 | 19.8 | 25.1 | 32.4 | 22.7 | 52.2 | 47.8 | MT063027  |
| <i>Thymallus baicalolenensis</i> | 946 | 20.4 | 27.0 | 29.5 | 23.2 | 49.9 | 50.1 | 1679 | 20.0 | 25.1 | 32.2 | 22.8 | 52.2 | 47.8 | KY078221  |
| <i>Thymallus baicalolenensis</i> | 946 | 20.4 | 27.0 | 29.5 | 23.2 | 49.9 | 50.1 | 1679 | 20.0 | 25.1 | 32.1 | 22.8 | 52.1 | 47.9 | MT063021  |
| <i>Thymallus baicalolenensis</i> | 946 | 20.4 | 27.0 | 29.5 | 23.2 | 49.9 | 50.1 | 1679 | 20.1 | 25.0 | 32.1 | 22.8 | 52.2 | 47.8 | KJ866482  |
| <i>Thymallus baicalolenensis</i> | 946 | 20.4 | 27.0 | 29.6 | 23.0 | 50.0 | 50.0 | 1679 | 20.0 | 25.1 | 32.1 | 22.8 | 52.1 | 47.9 | MT063018  |
| <i>Thymallus baicalolenensis</i> | 946 | 20.3 | 27.1 | 29.5 | 23.2 | 49.8 | 50.2 | 1679 | 20.0 | 25.1 | 32.1 | 22.8 | 52.1 | 47.9 | MT063019  |

|                                        |     |      |      |      |      |      |      |      |      |      |      |      |      |      |           |
|----------------------------------------|-----|------|------|------|------|------|------|------|------|------|------|------|------|------|-----------|
| <i>Thymallus baicalolenensis</i>       | 946 | 20.3 | 27.1 | 29.5 | 23.2 | 49.8 | 50.2 | 1679 | 20.1 | 25.0 | 32.2 | 22.8 | 52.2 | 47.8 | MT063020  |
| <i>Thymallus baicalolenensis</i>       | 946 | 20.4 | 27.0 | 29.5 | 23.2 | 49.9 | 50.1 | 1679 | 20.0 | 25.1 | 32.2 | 22.8 | 52.2 | 47.8 | NC 034294 |
| <i>Thymallus brevicephalus</i>         | 946 | 20.3 | 27.1 | 29.7 | 22.9 | 50.0 | 50.0 | 1679 | 20.0 | 25.0 | 32.4 | 22.6 | 52.4 | 47.6 | MT063034  |
| <i>Thymallus brevicephalus</i>         | 946 | 20.3 | 27.1 | 29.7 | 22.9 | 50.0 | 50.0 | 1679 | 20.0 | 25.0 | 32.4 | 22.6 | 52.4 | 47.6 | NC 056310 |
| <i>Thymallus brevicephalus</i>         | 946 | 20.3 | 27.1 | 29.7 | 22.9 | 50.0 | 50.0 | 1679 | 20.1 | 25.0 | 32.3 | 22.6 | 52.4 | 47.6 | MT063035  |
| <i>Thymallus brevicephalus</i>         | 946 | 20.3 | 27.1 | 29.7 | 22.9 | 50.0 | 50.0 | 1679 | 20.0 | 25.1 | 32.3 | 22.6 | 52.4 | 47.6 | MT063036  |
| <i>Thymallus brevirostris</i>          | 946 | 20.2 | 27.2 | 29.8 | 22.8 | 50.0 | 50.0 | 1679 | 20.0 | 25.1 | 32.4 | 22.5 | 52.4 | 47.6 | KJ866486  |
| <i>Thymallus brevirostris</i>          | 946 | 20.2 | 27.2 | 29.8 | 22.8 | 50.0 | 50.0 | 1678 | 20.1 | 25.1 | 32.2 | 22.6 | 52.3 | 47.7 | MH027384  |
| <i>Thymallus brevirostris</i>          | 946 | 20.2 | 27.2 | 29.8 | 22.8 | 50.0 | 50.0 | 1679 | 20.0 | 25.1 | 32.3 | 22.6 | 52.3 | 47.7 | MT063033  |
| <i>Thymallus brevirostris</i>          | 946 | 20.2 | 27.2 | 29.8 | 22.8 | 50.0 | 50.0 | 1679 | 20.0 | 25.1 | 32.4 | 22.5 | 52.4 | 47.6 | NC 027412 |
| <i>Thymallus burejensis</i>            | 947 | 20.3 | 27.1 | 29.5 | 23.1 | 49.7 | 50.3 | 1679 | 20.0 | 25.1 | 32.2 | 22.8 | 52.2 | 47.8 | MT063037  |
| <i>Thymallus burejensis</i>            | 947 | 20.3 | 27.2 | 29.5 | 23.0 | 49.7 | 50.3 | 1679 | 20.0 | 25.0 | 32.3 | 22.8 | 52.3 | 47.7 | NC 027411 |
| <i>Thymallus burejensis</i>            | 947 | 20.3 | 27.2 | 29.5 | 23.0 | 49.7 | 50.3 | 1679 | 20.0 | 25.0 | 32.3 | 22.8 | 52.3 | 47.7 | KJ866485  |
| <i>Thymallus burejensis</i>            | 947 | 20.3 | 27.1 | 29.5 | 23.1 | 49.7 | 50.3 | 1679 | 20.0 | 25.1 | 32.2 | 22.8 | 52.2 | 47.8 | KY078220  |
| <i>Thymallus grubii</i>                | 947 | 20.4 | 27.1 | 29.4 | 23.1 | 49.7 | 50.3 | 1679 | 20.0 | 25.1 | 32.1 | 22.8 | 52.1 | 47.9 | KY078219  |
| <i>Thymallus grubii</i>                | 947 | 20.4 | 27.1 | 29.5 | 23.0 | 49.8 | 50.2 | 1679 | 20.0 | 25.1 | 32.3 | 22.6 | 52.2 | 47.8 | KF649073  |
| <i>Thymallus grubii</i>                | 947 | 20.5 | 27.0 | 29.5 | 23.0 | 49.9 | 50.1 | 1679 | 20.0 | 25.1 | 32.3 | 22.6 | 52.3 | 47.7 | KF692113  |
| <i>Thymallus grubii</i>                | 947 | 20.4 | 27.1 | 29.4 | 23.1 | 49.7 | 50.3 | 1679 | 20.0 | 25.1 | 32.2 | 22.8 | 52.2 | 47.8 | MT063038  |
| <i>Thymallus grubii</i>                | 947 | 20.4 | 27.1 | 29.5 | 23.0 | 49.8 | 50.2 | 1679 | 20.0 | 25.1 | 32.3 | 22.6 | 52.2 | 47.8 | NC 022925 |
| <i>Thymallus grubii flavomaculatus</i> | 946 | 20.5 | 27.0 | 29.4 | 23.2 | 49.9 | 50.1 | 1679 | 19.9 | 25.2 | 32.2 | 22.8 | 52.1 | 47.9 | KU674353  |
| <i>Thymallus grubii flavomaculatus</i> | 947 | 20.6 | 27.1 | 29.4 | 22.9 | 49.9 | 50.1 | 1679 | 19.9 | 25.1 | 32.3 | 22.6 | 52.2 | 47.8 | KY078215  |
| <i>Thymallus grubii flavomaculatus</i> | 946 | 20.5 | 27.0 | 29.4 | 23.2 | 49.9 | 50.1 | 1679 | 19.9 | 25.2 | 32.2 | 22.8 | 52.1 | 47.9 | KY078216  |
| <i>Thymallus grubii flavomaculatus</i> | 947 | 20.5 | 27.1 | 29.4 | 23.0 | 49.8 | 50.2 | 1679 | 19.9 | 25.2 | 32.3 | 22.6 | 52.2 | 47.8 | MT063039  |
| <i>Thymallus grubii flavomaculatus</i> | 946 | 20.5 | 27.0 | 29.4 | 23.2 | 49.9 | 50.1 | 1679 | 19.9 | 25.2 | 32.2 | 22.8 | 52.1 | 47.9 | KU674354  |
| <i>Thymallus ligericus</i>             | 946 | 20.4 | 27.0 | 29.5 | 23.2 | 49.9 | 50.1 | 1679 | 20.1 | 25.0 | 32.2 | 22.7 | 52.3 | 47.7 | MT063046  |
| <i>Thymallus ligericus</i>             | 946 | 20.3 | 27.0 | 29.6 | 23.2 | 49.9 | 50.1 | 1679 | 20.1 | 25.0 | 32.3 | 22.6 | 52.4 | 47.6 | MT063053  |
| <i>Thymallus ligericus</i>             | 946 | 20.4 | 27.0 | 29.5 | 23.2 | 49.9 | 50.1 | 1679 | 20.1 | 25.0 | 32.2 | 22.7 | 52.3 | 47.7 | MT063007  |
| <i>Thymallus ligericus</i>             | 946 | 20.4 | 27.0 | 29.5 | 23.2 | 49.9 | 50.1 | 1679 | 20.1 | 25.0 | 32.3 | 22.6 | 52.4 | 47.6 | MT063047  |
| <i>Thymallus ligericus</i>             | 946 | 20.4 | 27.0 | 29.5 | 23.2 | 49.9 | 50.1 | 1679 | 20.1 | 25.0 | 32.3 | 22.6 | 52.4 | 47.6 | MT063048  |
| <i>Thymallus ligericus</i>             | 946 | 20.4 | 27.0 | 29.5 | 23.2 | 49.9 | 50.1 | 1679 | 20.1 | 25.0 | 32.2 | 22.6 | 52.4 | 47.6 | MT063049  |
| <i>Thymallus ligericus</i>             | 946 | 20.4 | 27.0 | 29.5 | 23.2 | 49.9 | 50.1 | 1679 | 20.1 | 25.0 | 32.2 | 22.6 | 52.4 | 47.6 | MT063050  |
| <i>Thymallus ligericus</i>             | 946 | 20.3 | 27.0 | 29.6 | 23.2 | 49.9 | 50.1 | 1679 | 20.1 | 25.0 | 32.3 | 22.6 | 52.4 | 47.6 | MT063051  |
| <i>Thymallus ligericus</i>             | 946 | 20.4 | 27.0 | 29.5 | 23.2 | 49.9 | 50.1 | 1679 | 20.1 | 25.0 | 32.3 | 22.6 | 52.4 | 47.6 | MT063052  |
| <i>Thymallus ligericus</i>             | 946 | 20.4 | 27.0 | 29.5 | 23.2 | 49.9 | 50.1 | 1679 | 20.1 | 25.0 | 32.2 | 22.7 | 52.3 | 47.7 | NC 056303 |

|                              |     |      |      |      |      |      |      |      |      |      |      |      |      |      |           |
|------------------------------|-----|------|------|------|------|------|------|------|------|------|------|------|------|------|-----------|
| <i>Thymallus nigrescens</i>  | 947 | 20.2 | 27.1 | 29.8 | 22.9 | 49.9 | 50.1 | 1679 | 19.9 | 25.0 | 32.5 | 22.6 | 52.4 | 47.6 | MT063028  |
| <i>Thymallus nigrescens</i>  | 947 | 20.2 | 27.1 | 29.8 | 22.9 | 49.9 | 50.1 | 1679 | 19.9 | 25.0 | 32.5 | 22.6 | 52.4 | 47.6 | NC 056307 |
| <i>Thymallus nikolskyi</i>   | 947 | 20.1 | 27.3 | 29.6 | 23.0 | 49.6 | 50.4 | 1679 | 20.0 | 25.1 | 32.3 | 22.6 | 52.3 | 47.7 | MT063029  |
| <i>Thymallus nikolskyi</i>   | 944 | 20.0 | 27.3 | 29.7 | 23.0 | 49.7 | 50.3 | 1679 | 20.0 | 25.1 | 32.3 | 22.6 | 52.3 | 47.7 | MT063030  |
| <i>Thymallus nikolskyi</i>   | 947 | 20.1 | 27.3 | 29.6 | 23.0 | 49.6 | 50.4 | 1679 | 20.0 | 25.1 | 32.3 | 22.6 | 52.3 | 47.7 | NC 056308 |
| <i>Thymallus pallasi</i>     | 946 | 20.4 | 27.0 | 29.5 | 23.2 | 49.9 | 50.1 | 1679 | 20.1 | 25.0 | 32.1 | 22.8 | 52.2 | 47.8 | NC 027408 |
| <i>Thymallus svetovidovi</i> | 947 | 20.1 | 27.3 | 29.7 | 22.9 | 49.7 | 50.3 | 1679 | 20.0 | 25.1 | 32.3 | 22.6 | 52.3 | 47.7 | MT063032  |
| <i>Thymallus svetovidovi</i> | 947 | 20.1 | 27.3 | 29.7 | 22.9 | 49.7 | 50.3 | 1679 | 20.0 | 25.1 | 32.3 | 22.6 | 52.3 | 47.7 | MT063031  |
| <i>Thymallus svetovidovi</i> | 947 | 20.1 | 27.3 | 29.7 | 22.9 | 49.7 | 50.3 | 1679 | 20.0 | 25.1 | 32.3 | 22.6 | 52.3 | 47.7 | NC 056309 |
| <i>Thymallus thymallus</i>   | 946 | 20.1 | 27.2 | 29.6 | 23.2 | 49.7 | 50.3 | 1678 | 19.9 | 25.2 | 32.2 | 22.7 | 52.1 | 47.9 | FJ853655  |
| <i>Thymallus thymallus</i>   | 946 | 20.3 | 27.0 | 29.6 | 23.2 | 49.9 | 50.1 | 1679 | 20.1 | 25.1 | 32.0 | 22.8 | 52.1 | 47.9 | MT062994  |
| <i>Thymallus thymallus</i>   | 946 | 20.1 | 27.2 | 29.6 | 23.2 | 49.7 | 50.3 | 1679 | 20.0 | 25.1 | 32.3 | 22.6 | 52.4 | 47.6 | MT062995  |
| <i>Thymallus thymallus</i>   | 946 | 20.1 | 27.2 | 29.6 | 23.2 | 49.7 | 50.3 | 1680 | 20.0 | 25.1 | 32.3 | 22.6 | 52.3 | 47.7 | MT062999  |
| <i>Thymallus thymallus</i>   | 946 | 20.1 | 27.2 | 29.7 | 23.0 | 49.8 | 50.2 | 1679 | 20.0 | 25.1 | 32.3 | 22.6 | 52.3 | 47.7 | MT063000  |
| <i>Thymallus thymallus</i>   | 946 | 20.2 | 27.1 | 29.8 | 22.9 | 50.0 | 50.0 | 1679 | 20.1 | 25.0 | 32.3 | 22.6 | 52.4 | 47.6 | MT063001  |
| <i>Thymallus thymallus</i>   | 946 | 20.2 | 27.1 | 29.6 | 23.2 | 49.8 | 50.2 | 1679 | 20.1 | 25.0 | 32.3 | 22.6 | 52.4 | 47.6 | MT063002  |
| <i>Thymallus thymallus</i>   | 946 | 20.2 | 27.1 | 29.8 | 22.9 | 50.0 | 50.0 | 1679 | 20.1 | 25.0 | 32.3 | 22.6 | 52.4 | 47.6 | MT063004  |
| <i>Thymallus thymallus</i>   | 946 | 20.2 | 27.1 | 29.7 | 23.0 | 49.9 | 50.1 | 1679 | 19.9 | 25.2 | 32.4 | 22.5 | 52.3 | 47.7 | MT063041  |
| <i>Thymallus thymallus</i>   | 946 | 20.1 | 27.2 | 29.7 | 23.0 | 49.8 | 50.2 | 1679 | 20.1 | 25.0 | 32.5 | 22.5 | 52.5 | 47.5 | MT063045  |
| <i>Thymallus thymallus</i>   | 946 | 20.2 | 27.1 | 29.7 | 23.0 | 49.9 | 50.1 | 1679 | 20.0 | 25.1 | 32.3 | 22.6 | 52.3 | 47.7 | MT062993  |
| <i>Thymallus thymallus</i>   | 944 | 20.3 | 26.9 | 29.7 | 23.1 | 50.0 | 50.0 | 1679 | 20.1 | 25.1 | 32.0 | 22.8 | 52.1 | 47.9 | MT062996  |
| <i>Thymallus thymallus</i>   | 946 | 20.3 | 26.8 | 29.6 | 23.3 | 49.9 | 50.1 | 1680 | 20.1 | 25.1 | 32.1 | 22.7 | 52.2 | 47.8 | MT062997  |
| <i>Thymallus thymallus</i>   | 946 | 20.3 | 26.8 | 29.6 | 23.3 | 49.9 | 50.1 | 1680 | 20.1 | 25.1 | 32.1 | 22.7 | 52.2 | 47.8 | MT062998  |
| <i>Thymallus thymallus</i>   | 946 | 20.1 | 27.2 | 29.7 | 23.0 | 49.8 | 50.2 | 1679 | 20.1 | 25.0 | 32.3 | 22.6 | 52.4 | 47.6 | MT063003  |
| <i>Thymallus thymallus</i>   | 946 | 20.1 | 27.2 | 29.7 | 23.0 | 49.8 | 50.2 | 1679 | 20.0 | 25.1 | 32.3 | 22.6 | 52.4 | 47.6 | MT063005  |
| <i>Thymallus thymallus</i>   | 946 | 20.1 | 27.2 | 29.6 | 23.2 | 49.7 | 50.3 | 1679 | 19.9 | 25.2 | 32.5 | 22.5 | 52.4 | 47.6 | MT063006  |
| <i>Thymallus thymallus</i>   | 946 | 20.2 | 27.1 | 29.7 | 23.0 | 49.9 | 50.1 | 1679 | 19.9 | 25.2 | 32.4 | 22.5 | 52.3 | 47.7 | MT063040  |
| <i>Thymallus thymallus</i>   | 946 | 20.1 | 27.2 | 29.6 | 23.2 | 49.7 | 50.3 | 1679 | 19.9 | 25.2 | 32.5 | 22.5 | 52.4 | 47.6 | MT063042  |
| <i>Thymallus thymallus</i>   | 946 | 20.2 | 27.1 | 29.7 | 23.0 | 49.9 | 50.1 | 1678 | 19.9 | 25.2 | 32.4 | 22.5 | 52.3 | 47.7 | MT063043  |
| <i>Thymallus thymallus</i>   | 946 | 20.1 | 27.1 | 29.8 | 23.0 | 49.9 | 50.1 | 1679 | 20.0 | 25.1 | 32.3 | 22.6 | 52.4 | 47.6 | MT063044  |
| <i>Thymallus thymallus</i>   | 946 | 20.1 | 27.2 | 29.7 | 23.0 | 49.8 | 50.2 | 1679 | 20.0 | 25.1 | 32.3 | 22.6 | 52.4 | 47.6 | MT410870  |
| <i>Thymallus thymallus</i>   | 946 | 20.1 | 27.2 | 29.6 | 23.2 | 49.7 | 50.3 | 1678 | 19.9 | 25.2 | 32.2 | 22.7 | 52.1 | 47.9 | NC 012928 |
| <i>Thymallus tugarinae</i>   | 947 | 20.3 | 27.2 | 29.5 | 23.0 | 49.7 | 50.3 | 1679 | 20.0 | 25.0 | 32.3 | 22.8 | 52.3 | 47.7 | NC 027409 |
| <i>Thymallus tugarinae</i>   | 947 | 20.3 | 27.2 | 29.5 | 23.0 | 49.7 | 50.3 | 1679 | 20.0 | 25.0 | 32.3 | 22.8 | 52.3 | 47.7 | KJ866483  |

|                            |     |      |      |      |      |      |      |      |      |      |      |      |      |      |           |
|----------------------------|-----|------|------|------|------|------|------|------|------|------|------|------|------|------|-----------|
| <i>Thymallus tugarinae</i> | 947 | 20.3 | 27.2 | 29.5 | 23.0 | 49.7 | 50.3 | 1679 | 20.0 | 25.0 | 32.3 | 22.8 | 52.3 | 47.7 | KY078217  |
| <i>Thymallus tugarinae</i> | 947 | 19.9 | 27.6 | 29.6 | 23.0 | 49.4 | 50.6 | 1679 | 20.0 | 24.9 | 32.3 | 22.8 | 52.3 | 47.7 | KY078218  |
| <i>Thymallus yaluensis</i> | 947 | 20.3 | 27.1 | 29.4 | 23.2 | 49.6 | 50.4 | 1679 | 19.8 | 25.3 | 32.3 | 22.6 | 52.1 | 47.9 | KJ866484  |
| <i>Thymallus yaluensis</i> | 947 | 20.3 | 27.1 | 29.4 | 23.2 | 49.6 | 50.4 | 1679 | 19.8 | 25.3 | 32.3 | 22.6 | 52.1 | 47.9 | NC 027410 |

---



**Table S4.** Nucleotide composition of the Control Region in Salmonids.

| Species                                 | Length | %T(U) | %C   | %A   | %G   | %AT  | %GC  | Accession ID |
|-----------------------------------------|--------|-------|------|------|------|------|------|--------------|
| <i>Brachymystax lenok</i>               | 1172   | 31.2  | 22.8 | 32.6 | 13.4 | 63.8 | 36.2 | JQ686730     |
| <i>Brachymystax lenok</i>               | 1172   | 31.2  | 22.8 | 32.6 | 13.4 | 63.8 | 36.2 | NC 018341    |
| <i>Brachymystax lenok tsinlingensis</i> | 1088   | 30.8  | 23.0 | 32.8 | 13.4 | 63.6 | 36.4 | JQ675732     |
| <i>Brachymystax lenok tsinlingensis</i> | 1009   | 31.0  | 22.6 | 32.3 | 14.1 | 63.3 | 36.7 | JQ686731     |
| <i>Brachymystax lenok tsinlingensis</i> | 1009   | 31.0  | 22.6 | 32.3 | 14.1 | 63.3 | 36.7 | NC 018342    |
| <i>Brachymystax tsinlingensis</i>       | 1175   | 31.3  | 22.6 | 33.1 | 13.0 | 64.4 | 35.6 | KY124134     |
| <i>Brachymystax tumensis</i>            | 1175   | 31.2  | 22.7 | 32.9 | 13.2 | 64.1 | 35.9 | KJ730524     |
| <i>Brachymystax tumensis</i>            | 1093   | 31.5  | 22.4 | 32.6 | 13.5 | 64.0 | 36.0 | KJ730525     |
| <i>Brachymystax tumensis</i>            | 1175   | 31.2  | 22.7 | 32.9 | 13.2 | 64.1 | 35.9 | NC 024674    |
| <i>Coregonus artedi</i>                 | 1160   | 30.5  | 24.0 | 31.3 | 14.2 | 61.8 | 38.2 | MF621765     |
| <i>Coregonus artedi</i>                 | 1159   | 30.5  | 23.8 | 31.3 | 14.4 | 61.8 | 38.2 | MF621766     |
| <i>Coregonus artedi</i>                 | 1160   | 30.5  | 23.8 | 31.3 | 14.4 | 61.8 | 38.2 | MH301055     |
| <i>Coregonus artedi</i>                 | 1257   | 31.0  | 23.5 | 32.1 | 13.4 | 63.1 | 36.9 | MH301056     |
| <i>Coregonus artedi</i>                 | 1160   | 30.5  | 23.8 | 31.3 | 14.4 | 61.8 | 38.2 | MW856899     |
| <i>Coregonus artedi</i>                 | 1160   | 30.5  | 24.0 | 31.3 | 14.2 | 61.8 | 38.2 | MW856900     |
| <i>Coregonus artedi</i>                 | 1160   | 30.5  | 24.0 | 31.3 | 14.2 | 61.8 | 38.2 | NC 036393    |
| <i>Coregonus autumnalis</i>             | 1075   | 30.0  | 24.5 | 30.6 | 15.0 | 60.6 | 39.4 | KP452507     |
| <i>Coregonus autumnalis</i>             | 1075   | 30.0  | 24.5 | 30.6 | 15.0 | 60.6 | 39.4 | NC 027277    |
| <i>Coregonus baicalensis</i>            | 1074   | 30.1  | 24.5 | 30.4 | 15.1 | 60.4 | 39.6 | MN394784     |
| <i>Coregonus baicalensis</i>            | 1074   | 30.2  | 24.4 | 30.3 | 15.2 | 60.4 | 39.6 | MN394785     |
| <i>Coregonus baicalensis</i>            | 1070   | 30.0  | 24.5 | 30.4 | 15.1 | 60.4 | 39.6 | MN394786     |
| <i>Coregonus baicalensis</i>            | 1074   | 30.1  | 24.5 | 30.4 | 15.1 | 60.4 | 39.6 | NC 045226    |
| <i>Coregonus chadary</i>                | 1078   | 30.3  | 23.9 | 30.8 | 14.9 | 61.1 | 38.9 | KU530206     |
| <i>Coregonus chadary</i>                | 1078   | 30.3  | 23.9 | 30.8 | 14.9 | 61.1 | 38.9 | NC 030175    |
| <i>Coregonus clupeaformis</i>           | 1075   | 30.0  | 24.5 | 30.6 | 14.9 | 60.7 | 39.3 | JQ661482     |
| <i>Coregonus clupeaformis</i>           | 1074   | 29.9  | 24.5 | 30.7 | 14.9 | 60.6 | 39.4 | JQ661483     |
| <i>Coregonus clupeaformis</i>           | 1073   | 30.0  | 24.4 | 30.7 | 14.9 | 60.7 | 39.3 | JQ661484     |
| <i>Coregonus clupeaformis</i>           | 1075   | 30.0  | 24.5 | 30.6 | 15.0 | 60.6 | 39.4 | JQ661485     |
| <i>Coregonus clupeaformis</i>           | 1073   | 29.9  | 24.5 | 30.8 | 14.8 | 60.7 | 39.3 | JQ661486     |
| <i>Coregonus clupeaformis</i>           | 1074   | 30.0  | 24.3 | 30.5 | 15.2 | 60.5 | 39.5 | JQ661487     |
| <i>Coregonus clupeaformis</i>           | 1078   | 30.1  | 24.5 | 30.5 | 14.9 | 60.6 | 39.4 | MH301057     |
| <i>Coregonus clupeaformis</i>           | 1075   | 30.0  | 24.5 | 30.6 | 15.0 | 60.6 | 39.4 | MH301058     |
| <i>Coregonus clupeaformis</i>           | 1083   | 30.0  | 24.6 | 30.5 | 15.0 | 60.5 | 39.5 | NC 020762    |
| <i>Coregonus clupeaformis</i>           | 1083   | 30.0  | 24.6 | 30.5 | 15.0 | 60.5 | 39.5 | JQ390060     |
| <i>Coregonus hoyi</i>                   | 1160   | 30.5  | 23.8 | 31.2 | 14.5 | 61.7 | 38.3 | MT667235     |
| <i>Coregonus hoyi</i>                   | 1160   | 30.5  | 23.8 | 31.2 | 14.5 | 61.7 | 38.3 | MW856853     |
| <i>Coregonus hoyi</i>                   | 1160   | 30.6  | 23.7 | 31.3 | 14.4 | 61.9 | 38.1 | MW856901     |
| <i>Coregonus hoyi</i>                   | 1160   | 30.6  | 23.7 | 31.3 | 14.4 | 61.9 | 38.1 | MW856902     |
| <i>Coregonus hoyi</i>                   | 1160   | 30.5  | 23.8 | 31.2 | 14.5 | 61.7 | 38.3 | NC 054288    |
| <i>Coregonus lavaretus</i>              | 1076   | 30.0  | 24.4 | 30.7 | 14.9 | 60.7 | 39.3 | JQ661382     |
| <i>Coregonus lavaretus</i>              | 1075   | 30.0  | 24.4 | 30.7 | 14.9 | 60.7 | 39.3 | JQ661383     |
| <i>Coregonus lavaretus</i>              | 1075   | 30.0  | 24.5 | 30.7 | 14.9 | 60.7 | 39.3 | JQ661384     |
| <i>Coregonus lavaretus</i>              | 1075   | 30.0  | 24.5 | 30.7 | 14.9 | 60.7 | 39.3 | JQ661385     |
| <i>Coregonus lavaretus</i>              | 1075   | 30.0  | 24.5 | 30.7 | 14.9 | 60.7 | 39.3 | JQ661386     |
| <i>Coregonus lavaretus</i>              | 1075   | 30.0  | 24.4 | 30.7 | 14.9 | 60.7 | 39.3 | JQ661387     |
| <i>Coregonus lavaretus</i>              | 1076   | 30.0  | 24.4 | 30.7 | 14.9 | 60.7 | 39.3 | JQ661388     |
| <i>Coregonus lavaretus</i>              | 1075   | 30.0  | 24.5 | 30.7 | 14.9 | 60.7 | 39.3 | JQ661389     |

|                            |      |      |      |      |      |      |      |          |
|----------------------------|------|------|------|------|------|------|------|----------|
| <i>Coregonus lavaretus</i> | 1075 | 30.0 | 24.4 | 30.7 | 14.9 | 60.7 | 39.3 | JQ661390 |
| <i>Coregonus lavaretus</i> | 1075 | 29.9 | 24.7 | 30.6 | 14.9 | 60.5 | 39.5 | JQ661392 |
| <i>Coregonus lavaretus</i> | 1075 | 29.9 | 24.6 | 30.7 | 14.9 | 60.6 | 39.4 | JQ661393 |
| <i>Coregonus lavaretus</i> | 1075 | 30.2 | 24.2 | 30.8 | 14.8 | 61.0 | 39.0 | JQ661419 |
| <i>Coregonus lavaretus</i> | 1075 | 30.2 | 24.2 | 30.8 | 14.8 | 61.0 | 39.0 | JQ661420 |
| <i>Coregonus lavaretus</i> | 1075 | 30.2 | 24.2 | 30.8 | 14.8 | 61.0 | 39.0 | JQ661421 |
| <i>Coregonus lavaretus</i> | 1075 | 30.2 | 24.2 | 30.8 | 14.8 | 61.0 | 39.0 | JQ661422 |
| <i>Coregonus lavaretus</i> | 1075 | 30.2 | 24.2 | 30.8 | 14.8 | 61.0 | 39.0 | JQ661423 |
| <i>Coregonus lavaretus</i> | 1076 | 30.3 | 24.2 | 30.8 | 14.8 | 61.1 | 38.9 | JQ661424 |
| <i>Coregonus lavaretus</i> | 1075 | 30.2 | 24.2 | 30.8 | 14.8 | 61.0 | 39.0 | JQ661425 |
| <i>Coregonus lavaretus</i> | 1075 | 30.2 | 24.2 | 30.8 | 14.8 | 61.0 | 39.0 | JQ661426 |
| <i>Coregonus lavaretus</i> | 1075 | 30.2 | 24.2 | 30.8 | 14.8 | 61.0 | 39.0 | JQ661427 |
| <i>Coregonus lavaretus</i> | 1076 | 30.3 | 24.2 | 30.8 | 14.8 | 61.1 | 38.9 | JQ661431 |
| <i>Coregonus lavaretus</i> | 1075 | 30.2 | 24.2 | 30.7 | 14.9 | 60.9 | 39.1 | JQ661432 |
| <i>Coregonus lavaretus</i> | 1075 | 30.2 | 24.2 | 30.8 | 14.8 | 61.0 | 39.0 | JQ661435 |
| <i>Coregonus lavaretus</i> | 1075 | 30.2 | 24.2 | 30.8 | 14.8 | 61.0 | 39.0 | JQ661436 |
| <i>Coregonus lavaretus</i> | 1075 | 30.2 | 24.2 | 30.8 | 14.8 | 61.0 | 39.0 | JQ661437 |
| <i>Coregonus lavaretus</i> | 1076 | 30.3 | 24.2 | 30.7 | 14.9 | 61.0 | 39.0 | JQ661438 |
| <i>Coregonus lavaretus</i> | 1076 | 30.3 | 24.2 | 30.8 | 14.8 | 61.1 | 38.9 | JQ661439 |
| <i>Coregonus lavaretus</i> | 1075 | 30.2 | 24.2 | 30.8 | 14.8 | 61.0 | 39.0 | JQ661440 |
| <i>Coregonus lavaretus</i> | 1076 | 30.3 | 24.2 | 30.8 | 14.8 | 61.1 | 38.9 | JQ661441 |
| <i>Coregonus lavaretus</i> | 1076 | 30.3 | 24.2 | 30.8 | 14.8 | 61.1 | 38.9 | JQ661443 |
| <i>Coregonus lavaretus</i> | 1075 | 30.3 | 24.2 | 30.7 | 14.8 | 61.0 | 39.0 | JQ661444 |
| <i>Coregonus lavaretus</i> | 1076 | 30.0 | 24.4 | 30.8 | 14.8 | 60.8 | 39.2 | JQ661445 |
| <i>Coregonus lavaretus</i> | 1076 | 30.3 | 24.2 | 30.8 | 14.8 | 61.1 | 38.9 | JQ661446 |
| <i>Coregonus lavaretus</i> | 1076 | 30.3 | 24.2 | 30.8 | 14.8 | 61.1 | 38.9 | JQ661447 |
| <i>Coregonus lavaretus</i> | 1076 | 30.3 | 24.2 | 30.8 | 14.8 | 61.1 | 38.9 | JQ661449 |
| <i>Coregonus lavaretus</i> | 1076 | 30.4 | 24.2 | 30.7 | 14.8 | 61.1 | 38.9 | JQ661451 |
| <i>Coregonus lavaretus</i> | 1076 | 30.3 | 24.2 | 30.8 | 14.8 | 61.1 | 38.9 | JQ661452 |
| <i>Coregonus lavaretus</i> | 1075 | 30.2 | 24.2 | 30.8 | 14.8 | 61.0 | 39.0 | JQ661453 |
| <i>Coregonus lavaretus</i> | 1074 | 30.2 | 24.2 | 30.8 | 14.8 | 61.0 | 39.0 | JQ661454 |
| <i>Coregonus lavaretus</i> | 1075 | 30.2 | 24.2 | 30.8 | 14.8 | 61.0 | 39.0 | JQ661455 |
| <i>Coregonus lavaretus</i> | 1074 | 30.2 | 24.2 | 30.8 | 14.8 | 61.0 | 39.0 | JQ661456 |
| <i>Coregonus lavaretus</i> | 1075 | 30.2 | 24.2 | 30.8 | 14.8 | 61.0 | 39.0 | JQ661457 |
| <i>Coregonus lavaretus</i> | 1075 | 30.2 | 24.2 | 30.8 | 14.8 | 61.0 | 39.0 | JQ661458 |
| <i>Coregonus lavaretus</i> | 1075 | 30.2 | 24.2 | 30.8 | 14.8 | 61.0 | 39.0 | JQ661462 |
| <i>Coregonus lavaretus</i> | 1075 | 30.2 | 24.2 | 30.8 | 14.8 | 61.0 | 39.0 | JQ661463 |
| <i>Coregonus lavaretus</i> | 1075 | 30.2 | 24.2 | 30.8 | 14.8 | 61.0 | 39.0 | JQ661464 |
| <i>Coregonus lavaretus</i> | 1075 | 30.2 | 24.2 | 30.8 | 14.8 | 61.0 | 39.0 | JQ661465 |
| <i>Coregonus lavaretus</i> | 1076 | 30.3 | 24.2 | 30.8 | 14.8 | 61.1 | 38.9 | JQ661466 |
| <i>Coregonus lavaretus</i> | 1076 | 30.3 | 24.2 | 30.8 | 14.8 | 61.1 | 38.9 | JQ661467 |
| <i>Coregonus lavaretus</i> | 1075 | 30.2 | 24.2 | 30.8 | 14.8 | 61.0 | 39.0 | JQ661468 |
| <i>Coregonus lavaretus</i> | 1075 | 30.2 | 24.2 | 30.8 | 14.8 | 61.0 | 39.0 | JQ661469 |
| <i>Coregonus lavaretus</i> | 1076 | 30.3 | 24.2 | 30.8 | 14.8 | 61.1 | 38.9 | JQ661470 |
| <i>Coregonus lavaretus</i> | 1076 | 30.3 | 24.2 | 30.8 | 14.8 | 61.1 | 38.9 | JQ661471 |
| <i>Coregonus lavaretus</i> | 1075 | 30.2 | 24.2 | 30.8 | 14.8 | 61.0 | 39.0 | JQ661472 |
| <i>Coregonus lavaretus</i> | 1075 | 30.2 | 24.2 | 30.8 | 14.8 | 61.0 | 39.0 | JQ661473 |
| <i>Coregonus lavaretus</i> | 1075 | 30.0 | 24.4 | 30.7 | 14.9 | 60.7 | 39.3 | JQ661474 |
| <i>Coregonus lavaretus</i> | 1075 | 30.2 | 24.2 | 30.8 | 14.8 | 61.0 | 39.0 | JQ661475 |
| <i>Coregonus lavaretus</i> | 1075 | 30.2 | 24.2 | 30.8 | 14.8 | 61.0 | 39.0 | JQ661476 |
| <i>Coregonus lavaretus</i> | 1075 | 30.2 | 24.2 | 30.8 | 14.8 | 61.0 | 39.0 | JQ661477 |

|                              |      |      |      |      |      |      |      |           |
|------------------------------|------|------|------|------|------|------|------|-----------|
| <i>Coregonus lavaretus</i>   | 1076 | 30.3 | 24.2 | 30.8 | 14.8 | 61.1 | 38.9 | JQ661478  |
| <i>Coregonus lavaretus</i>   | 1075 | 30.2 | 24.2 | 30.8 | 14.8 | 61.0 | 39.0 | JQ661479  |
| <i>Coregonus lavaretus</i>   | 1076 | 30.3 | 24.2 | 30.8 | 14.8 | 61.1 | 38.9 | JQ661480  |
| <i>Coregonus lavaretus</i>   | 1075 | 30.2 | 24.2 | 30.8 | 14.8 | 61.0 | 39.0 | JQ661481  |
| <i>Coregonus lavaretus</i>   | 1077 | 30.0 | 24.5 | 30.7 | 14.8 | 60.7 | 39.3 | MK913369  |
| <i>Coregonus lavaretus</i>   | 1076 | 30.2 | 24.3 | 30.7 | 14.9 | 60.9 | 39.1 | AB034824  |
| <i>Coregonus lavaretus</i>   | 1075 | 30.0 | 24.5 | 30.6 | 15.0 | 60.6 | 39.4 | JQ661391  |
| <i>Coregonus lavaretus</i>   | 1076 | 29.9 | 24.5 | 30.7 | 14.9 | 60.6 | 39.4 | JQ661394  |
| <i>Coregonus lavaretus</i>   | 1075 | 30.0 | 24.5 | 30.8 | 14.8 | 60.7 | 39.3 | JQ661395  |
| <i>Coregonus lavaretus</i>   | 1076 | 29.9 | 24.5 | 30.7 | 14.9 | 60.6 | 39.4 | JQ661396  |
| <i>Coregonus lavaretus</i>   | 1075 | 30.0 | 24.4 | 30.7 | 14.9 | 60.7 | 39.3 | JQ661397  |
| <i>Coregonus lavaretus</i>   | 1076 | 30.3 | 24.2 | 30.8 | 14.8 | 61.1 | 38.9 | JQ661428  |
| <i>Coregonus lavaretus</i>   | 1075 | 30.2 | 24.2 | 30.8 | 14.8 | 61.0 | 39.0 | JQ661429  |
| <i>Coregonus lavaretus</i>   | 1076 | 30.3 | 24.2 | 30.8 | 14.8 | 61.1 | 38.9 | JQ661430  |
| <i>Coregonus lavaretus</i>   | 1075 | 30.2 | 24.2 | 30.7 | 14.9 | 60.9 | 39.1 | JQ661433  |
| <i>Coregonus lavaretus</i>   | 1075 | 30.2 | 24.2 | 30.8 | 14.8 | 61.0 | 39.0 | JQ661434  |
| <i>Coregonus lavaretus</i>   | 1075 | 30.2 | 24.2 | 30.8 | 14.8 | 61.0 | 39.0 | JQ661442  |
| <i>Coregonus lavaretus</i>   | 1075 | 30.2 | 24.2 | 30.7 | 14.9 | 60.9 | 39.1 | JQ661448  |
| <i>Coregonus lavaretus</i>   | 1076 | 30.3 | 24.2 | 30.8 | 14.8 | 61.1 | 38.9 | JQ661450  |
| <i>Coregonus lavaretus</i>   | 1075 | 30.2 | 24.2 | 30.8 | 14.8 | 61.0 | 39.0 | JQ661459  |
| <i>Coregonus lavaretus</i>   | 1076 | 30.3 | 24.2 | 30.8 | 14.8 | 61.1 | 38.9 | JQ661460  |
| <i>Coregonus lavaretus</i>   | 1076 | 30.3 | 24.2 | 30.8 | 14.8 | 61.1 | 38.9 | JQ661461  |
| <i>Coregonus lavaretus</i>   | 1076 | 30.2 | 24.3 | 30.7 | 14.9 | 60.9 | 39.1 | NC 002646 |
| <i>Coregonus migratorius</i> | 1076 | 29.9 | 24.5 | 30.4 | 15.1 | 60.3 | 39.7 | MN394787  |
| <i>Coregonus migratorius</i> | 1076 | 30.0 | 24.4 | 30.3 | 15.2 | 60.3 | 39.7 | MN394788  |
| <i>Coregonus migratorius</i> | 1076 | 29.9 | 24.5 | 30.4 | 15.1 | 60.3 | 39.7 | NC 045227 |
| <i>Coregonus migratorius</i> | 1076 | 30.0 | 24.4 | 30.4 | 15.1 | 60.4 | 39.6 | MN394789  |
| <i>Coregonus muksun</i>      | 1075 | 30.0 | 24.4 | 30.7 | 14.9 | 60.7 | 39.3 | KT824877  |
| <i>Coregonus muksun</i>      | 1075 | 30.0 | 24.4 | 30.7 | 14.9 | 60.7 | 39.3 | NC 028593 |
| <i>Coregonus nasus</i>       | 1078 | 30.3 | 23.9 | 30.8 | 14.9 | 61.1 | 38.9 | JQ390058  |
| <i>Coregonus nasus</i>       | 1078 | 30.3 | 23.9 | 30.8 | 14.9 | 61.1 | 38.9 | NC 020760 |
| <i>Coregonus oxyrinchus</i>  | 1076 | 30.3 | 24.2 | 30.7 | 14.9 | 61.0 | 39.0 | JQ661398  |
| <i>Coregonus oxyrinchus</i>  | 1075 | 30.2 | 24.2 | 30.7 | 14.9 | 60.9 | 39.1 | JQ661399  |
| <i>Coregonus oxyrinchus</i>  | 1076 | 30.3 | 24.2 | 30.8 | 14.8 | 61.1 | 38.9 | JQ661400  |
| <i>Coregonus oxyrinchus</i>  | 1076 | 30.0 | 24.4 | 30.7 | 14.9 | 60.7 | 39.3 | JQ661401  |
| <i>Coregonus oxyrinchus</i>  | 1075 | 30.2 | 24.2 | 30.7 | 14.9 | 60.9 | 39.1 | JQ661402  |
| <i>Coregonus oxyrinchus</i>  | 1075 | 30.2 | 24.2 | 30.8 | 14.8 | 61.0 | 39.0 | JQ661403  |
| <i>Coregonus oxyrinchus</i>  | 1075 | 30.0 | 24.4 | 30.7 | 14.9 | 60.7 | 39.3 | JQ661404  |
| <i>Coregonus oxyrinchus</i>  | 1076 | 30.3 | 24.2 | 30.7 | 14.9 | 61.0 | 39.0 | JQ661405  |
| <i>Coregonus oxyrinchus</i>  | 1075 | 30.2 | 24.2 | 30.8 | 14.8 | 61.0 | 39.0 | JQ661406  |
| <i>Coregonus oxyrinchus</i>  | 1075 | 30.2 | 24.2 | 30.8 | 14.8 | 61.0 | 39.0 | JQ661407  |
| <i>Coregonus oxyrinchus</i>  | 1074 | 30.2 | 24.2 | 30.8 | 14.8 | 61.0 | 39.0 | JQ661408  |
| <i>Coregonus oxyrinchus</i>  | 1074 | 30.2 | 24.2 | 30.8 | 14.8 | 61.0 | 39.0 | JQ661409  |
| <i>Coregonus oxyrinchus</i>  | 1075 | 30.2 | 24.2 | 30.8 | 14.8 | 61.0 | 39.0 | JQ661410  |
| <i>Coregonus oxyrinchus</i>  | 1076 | 30.3 | 24.2 | 30.7 | 14.9 | 61.0 | 39.0 | JQ661411  |
| <i>Coregonus oxyrinchus</i>  | 1075 | 30.2 | 24.2 | 30.7 | 14.9 | 60.9 | 39.1 | JQ661412  |
| <i>Coregonus oxyrinchus</i>  | 1075 | 30.2 | 24.2 | 30.8 | 14.8 | 61.0 | 39.0 | JQ661413  |
| <i>Coregonus oxyrinchus</i>  | 1076 | 30.3 | 24.2 | 30.7 | 14.9 | 61.0 | 39.0 | JQ661414  |
| <i>Coregonus oxyrinchus</i>  | 1074 | 30.2 | 24.2 | 30.8 | 14.8 | 61.0 | 39.0 | JQ661415  |
| <i>Coregonus oxyrinchus</i>  | 1076 | 30.3 | 24.2 | 30.7 | 14.9 | 61.0 | 39.0 | JQ661416  |
| <i>Coregonus oxyrinchus</i>  | 1075 | 30.0 | 24.5 | 30.7 | 14.9 | 60.7 | 39.3 | JQ661417  |

|                                        |      |      |      |      |      |      |      |           |            |
|----------------------------------------|------|------|------|------|------|------|------|-----------|------------|
| <i>Coregonus oxyrinchus</i>            | 1076 | 30.3 | 24.2 | 30.8 | 14.8 | 61.1 | 38.9 | JQ661418  | this study |
| <i>Coregonus oxyrinchus</i>            | 1076 | 30.3 | 24.2 | 30.8 | 14.8 | 61.1 | 38.9 | NC 020765 |            |
| <i>Coregonus peled</i>                 | 1075 | 30.2 | 24.2 | 30.8 | 14.8 | 61.0 | 39.0 | KM361633  |            |
| <i>Coregonus peled</i>                 | 1075 | 30.2 | 24.2 | 30.8 | 14.8 | 61.0 | 39.0 | NC 025576 |            |
| <i>Coregonus sp. cluncaformis</i>      | 1075 | 30.0 | 24.5 | 30.8 | 14.8 | 60.7 | 39.3 | KT375339  |            |
| <i>Coregonus sp. cluncaformis</i>      | 1075 | 30.0 | 24.5 | 30.8 | 14.8 | 60.7 | 39.3 | NC 028198 |            |
| <i>Coregonus ussuriensis</i>           | 1074 | 30.2 | 24.1 | 30.6 | 15.1 | 60.8 | 39.2 | KM210289  |            |
| <i>Coregonus ussuriensis</i>           | 1074 | 30.2 | 24.1 | 30.6 | 15.1 | 60.8 | 39.2 | NC 025648 |            |
| <i>Hucho bleekeri</i>                  | 1339 | 29.9 | 24.4 | 32.4 | 13.2 | 62.4 | 37.6 | HM804473  |            |
| <i>Hucho bleekeri</i>                  | 1179 | 30.2 | 23.9 | 31.9 | 14.0 | 62.1 | 37.9 | KF908853  |            |
| <i>Hucho bleekeri</i>                  | 1339 | 29.9 | 24.4 | 32.4 | 13.2 | 62.4 | 37.6 | NC 015995 |            |
| <i>Hucho hucho</i>                     | 1096 | 29.7 | 24.4 | 31.1 | 14.8 | 60.9 | 39.1 | KM588351  |            |
| <i>Hucho hucho</i>                     | 1096 | 29.7 | 24.4 | 31.1 | 14.8 | 60.9 | 39.1 | NC 025589 |            |
| <i>Hucho taimen</i>                    | 1176 | 30.4 | 23.9 | 31.5 | 14.2 | 61.9 | 38.1 | HQ897271  |            |
| <i>Hucho taimen</i>                    | 1257 | 30.4 | 23.9 | 31.8 | 13.8 | 62.2 | 37.8 | KJ711549  |            |
| <i>Hucho taimen</i>                    | 1175 | 30.2 | 24.0 | 31.6 | 14.2 | 61.8 | 38.2 | KJ711550  |            |
| <i>Hucho taimen</i>                    | 1176 | 30.7 | 23.6 | 31.0 | 14.8 | 61.6 | 38.4 | MK258077  |            |
| <i>Hucho taimen</i>                    | 1176 | 30.7 | 23.6 | 31.0 | 14.8 | 61.6 | 38.4 | MK258078  |            |
| <i>Hucho taimen</i>                    | 1176 | 30.7 | 23.6 | 31.0 | 14.8 | 61.6 | 38.4 | MK258079  |            |
| <i>Hucho taimen</i>                    | 1258 | 30.1 | 24.2 | 31.7 | 13.9 | 61.8 | 38.2 | MK258080  |            |
| <i>Hucho taimen</i>                    | 1258 | 30.3 | 24.1 | 31.7 | 13.9 | 62.0 | 38.0 | MK258081  |            |
| <i>Hucho taimen</i>                    | 1176 | 30.4 | 23.9 | 31.6 | 14.1 | 62.0 | 38.0 | MK258082  |            |
| <i>Hucho taimen</i>                    | 1176 | 30.4 | 23.9 | 31.6 | 14.1 | 62.0 | 38.0 | MK258083  |            |
| <i>Hucho taimen</i>                    | 1176 | 30.4 | 23.9 | 31.6 | 14.1 | 62.0 | 38.0 | MK258084  |            |
| <i>Hucho taimen</i>                    | 1176 | 30.4 | 23.9 | 31.5 | 14.2 | 61.9 | 38.1 | NC 016426 |            |
| <i>Oncorhynchus chrysogaster</i>       | 1002 | 30.6 | 23.0 | 30.8 | 15.6 | 61.5 | 38.5 | OP902890  |            |
| <i>Oncorhynchus clarkii henshawi</i>   | 1003 | 30.6 | 23.4 | 30.8 | 15.2 | 61.4 | 38.6 | AY886762  |            |
| <i>Oncorhynchus clarkii henshawi</i>   | 1003 | 30.6 | 23.4 | 30.8 | 15.2 | 61.4 | 38.6 | NC 006897 |            |
| <i>Oncorhynchus clarkii stomias</i>    | 1002 | 30.3 | 23.6 | 30.5 | 15.6 | 60.9 | 39.1 | KP013107  |            |
| <i>Oncorhynchus clarkii stomias</i>    | 1002 | 30.3 | 23.6 | 30.5 | 15.6 | 60.9 | 39.1 | KP013117  |            |
| <i>Oncorhynchus clarkii virginalis</i> | 1002 | 30.7 | 23.1 | 30.5 | 15.7 | 61.3 | 38.7 | MW300344  |            |
| <i>Oncorhynchus clarkii virginalis</i> | 1002 | 30.7 | 23.1 | 30.5 | 15.7 | 61.3 | 38.7 | MW300343  |            |
| <i>Oncorhynchus gilae</i>              | 1002 | 30.9 | 22.5 | 30.6 | 16.0 | 61.6 | 38.4 | MW300334  |            |
| <i>Oncorhynchus gilae</i>              | 1002 | 30.9 | 22.5 | 30.6 | 16.0 | 61.6 | 38.4 | MW300335  |            |
| <i>Oncorhynchus gilae</i>              | 1002 | 30.9 | 22.5 | 30.6 | 16.0 | 61.6 | 38.4 | MW300336  |            |
| <i>Oncorhynchus gilae</i>              | 1002 | 30.9 | 22.5 | 30.6 | 16.0 | 61.6 | 38.4 | NC 056957 |            |
| <i>Oncorhynchus gilae apache</i>       | 1003 | 31.0 | 22.4 | 30.7 | 15.9 | 61.7 | 38.3 | MW300342  |            |
| <i>Oncorhynchus gorbuscha</i>          | 1131 | 31.3 | 23.3 | 29.1 | 16.3 | 60.4 | 39.6 | EF455489  |            |
| <i>Oncorhynchus gorbuscha</i>          | 1131 | 31.3 | 23.3 | 29.1 | 16.3 | 60.4 | 39.6 | NC 010959 |            |
| <i>Oncorhynchus keta</i>               | 1001 | 30.3 | 24.0 | 30.6 | 15.2 | 60.8 | 39.2 | AP010773  |            |
| <i>Oncorhynchus keta</i>               | 1001 | 30.3 | 24.0 | 30.6 | 15.2 | 60.8 | 39.2 | NC 017838 |            |
| <i>Oncorhynchus keta</i>               | 1001 | 30.1 | 24.0 | 30.7 | 15.3 | 60.7 | 39.3 | KY320492  |            |
| <i>Oncorhynchus kisutch</i>            | 1003 | 31.0 | 22.7 | 30.5 | 15.8 | 61.5 | 38.5 | MF621751  |            |
| <i>Oncorhynchus kisutch</i>            | 1003 | 31.0 | 22.7 | 30.2 | 16.1 | 61.2 | 38.8 | MH003640  |            |
| <i>Oncorhynchus kisutch</i>            | 1002 | 30.9 | 22.8 | 30.3 | 16.0 | 61.3 | 38.7 | EF126369  |            |
| <i>Oncorhynchus kisutch</i>            | 1002 | 30.9 | 22.8 | 30.3 | 16.0 | 61.3 | 38.7 | MF621749  |            |
| <i>Oncorhynchus kisutch</i>            | 1002 | 30.9 | 22.8 | 30.3 | 16.0 | 61.3 | 38.7 | NC 009263 |            |
| <i>Oncorhynchus masou biwa</i>         | 998  | 30.4 | 23.3 | 30.4 | 15.9 | 60.7 | 39.3 | EF105342  |            |
| <i>Oncorhynchus masou biwa</i>         | 998  | 30.4 | 23.3 | 30.4 | 15.9 | 60.7 | 39.3 | NC 009262 |            |
| <i>Oncorhynchus masou formosanus</i>   | 998  | 30.1 | 23.7 | 30.3 | 15.9 | 60.3 | 39.7 | DQ858456  |            |

|                                          |      |      |      |      |      |      |      |           |               |
|------------------------------------------|------|------|------|------|------|------|------|-----------|---------------|
| <i>Oncorhynchus masou formosanus</i>     | 999  | 30.0 | 23.7 | 30.3 | 15.9 | 60.4 | 39.6 | KU523579  | this<br>study |
| <i>Oncorhynchus masou formosanus</i>     | 994  | 29.7 | 24.0 | 30.3 | 16.0 | 60.0 | 40.0 | KY250421  |               |
| <i>Oncorhynchus masou formosanus</i>     | 998  | 30.1 | 23.7 | 30.3 | 15.9 | 60.3 | 39.7 | NC 008745 |               |
| <i>Oncorhynchus masou ishikawae</i>      | 998  | 30.3 | 23.4 | 30.4 | 15.9 | 60.6 | 39.4 | DQ864464  |               |
| <i>Oncorhynchus masou ishikawae</i>      | 998  | 30.3 | 23.4 | 30.4 | 15.9 | 60.6 | 39.4 | NC 008746 |               |
| <i>Oncorhynchus masou masou</i>          | 1003 | 30.7 | 23.8 | 30.5 | 15.0 | 61.2 | 38.8 | KY320493  |               |
| <i>Oncorhynchus masou masou</i>          | 998  | 29.8 | 23.6 | 30.5 | 16.1 | 60.2 | 39.8 | DQ864465  |               |
| <i>Oncorhynchus masou masou</i>          | 998  | 29.8 | 23.6 | 30.5 | 16.1 | 60.2 | 39.8 | NC 008747 |               |
| <i>Oncorhynchus mykiss</i>               | 1003 | 30.7 | 22.9 | 30.8 | 15.6 | 61.5 | 38.5 | DQ288268  |               |
| <i>Oncorhynchus mykiss</i>               | 1003 | 30.9 | 22.8 | 30.7 | 15.6 | 61.6 | 38.4 | MF621750  |               |
| <i>Oncorhynchus mykiss</i>               | 1003 | 30.9 | 22.9 | 30.6 | 15.6 | 61.5 | 38.5 | NC 001717 |               |
| <i>Oncorhynchus mykiss</i>               | 1003 | 30.6 | 23.0 | 30.8 | 15.6 | 61.4 | 38.6 | DQ288269  |               |
| <i>Oncorhynchus mykiss</i>               | 1003 | 30.6 | 23.0 | 30.7 | 15.7 | 61.3 | 38.7 | DQ288270  |               |
| <i>Oncorhynchus mykiss</i>               | 1003 | 30.7 | 23.0 | 30.6 | 15.7 | 61.3 | 38.7 | DQ288271  |               |
| <i>Oncorhynchus mykiss</i>               | 1002 | 30.4 | 23.2 | 30.7 | 15.7 | 61.2 | 38.8 | KP013084  |               |
| <i>Oncorhynchus mykiss</i>               | 1003 | 30.7 | 22.9 | 30.8 | 15.6 | 61.5 | 38.5 | KP085590  |               |
| <i>Oncorhynchus mykiss</i>               | 1002 | 30.8 | 22.9 | 30.8 | 15.5 | 61.7 | 38.3 | MT410879  |               |
| <i>Oncorhynchus mykiss</i>               | 1001 | 30.8 | 23.0 | 30.7 | 15.6 | 61.4 | 38.6 | MT667254  |               |
| <i>Oncorhynchus mykiss</i>               | 1003 | 30.9 | 22.9 | 30.6 | 15.6 | 61.5 | 38.5 | L29771    |               |
| <i>Oncorhynchus mykiss nelsoni</i>       | 1004 | 30.7 | 22.9 | 30.8 | 15.6 | 61.5 | 38.5 | OP902891  |               |
| <i>Oncorhynchus mykiss x Salmo salar</i> | 993  | 30.8 | 23.0 | 30.8 | 15.4 | 61.6 | 38.4 | KP218514  |               |
| <i>Oncorhynchus mykiss x Salmo salar</i> | 993  | 30.8 | 23.0 | 30.8 | 15.4 | 61.6 | 38.4 | NC 026537 |               |
| <i>Oncorhynchus nerka</i>                | 1004 | 30.2 | 23.5 | 30.4 | 15.9 | 60.6 | 39.4 | EF055889  |               |
| <i>Oncorhynchus nerka</i>                | 1004 | 30.4 | 23.4 | 30.2 | 16.0 | 60.6 | 39.4 | MG993162  |               |
| <i>Oncorhynchus nerka</i>                | 1004 | 30.4 | 23.4 | 30.2 | 16.0 | 60.6 | 39.4 | MH003639  |               |
| <i>Oncorhynchus nerka</i>                | 1004 | 30.4 | 23.4 | 30.2 | 16.0 | 60.6 | 39.4 | MH003641  |               |
| <i>Oncorhynchus nerka</i>                | 1004 | 30.2 | 23.5 | 30.4 | 15.9 | 60.6 | 39.4 | NC 008615 |               |
| <i>Oncorhynchus tshawytscha</i>          | 986  | 31.0 | 23.5 | 29.4 | 16.0 | 60.4 | 39.6 | AF392054  |               |
| <i>Oncorhynchus tshawytscha</i>          | 986  | 31.0 | 23.5 | 29.4 | 16.0 | 60.4 | 39.6 | NC 002980 |               |
| <i>Parahucho perryi</i>                  | 990  | 31.1 | 22.2 | 32.3 | 14.3 | 63.4 | 36.6 | KJ816316  |               |
| <i>Parahucho perryi</i>                  | 988  | 30.9 | 22.4 | 32.4 | 14.4 | 63.3 | 36.7 | KC897653  |               |
| <i>Parahucho perryi</i>                  | 990  | 31.0 | 22.3 | 32.3 | 14.3 | 63.3 | 36.7 | KJ816315  |               |
| <i>Parahucho perryi</i>                  | 988  | 30.9 | 22.4 | 32.4 | 14.4 | 63.3 | 36.7 | NC 021651 |               |
| <i>Prosopium cylindraceum</i>            | 1172 | 30.1 | 24.1 | 31.1 | 14.8 | 61.2 | 38.8 | MF621767  |               |
| <i>Prosopium cylindraceum</i>            | 1172 | 30.0 | 24.1 | 30.7 | 15.2 | 60.8 | 39.2 | MF621768  |               |
| <i>Prosopium cylindraceum</i>            | 866  | 29.6 | 24.1 | 29.3 | 17.0 | 58.9 | 41.1 | JQ390062  |               |
| <i>Prosopium cylindraceum</i>            | 1012 | 29.8 | 24.1 | 30.1 | 15.9 | 60.0 | 40.0 | MF621759  |               |
| <i>Prosopium cylindraceum</i>            | 1092 | 30.0 | 24.1 | 30.8 | 15.1 | 60.8 | 39.2 | MF621764  |               |
| <i>Prosopium cylindraceum</i>            | 866  | 29.6 | 24.1 | 29.3 | 17.0 | 58.9 | 41.1 | NC 020764 |               |
| <i>Prosopium williamsoni</i>             | 1093 | 29.9 | 24.9 | 30.1 | 15.1 | 60.0 | 40.0 | JQ390061  |               |
| <i>Prosopium williamsoni</i>             | 1093 | 29.9 | 24.9 | 30.1 | 15.1 | 60.0 | 40.0 | NC 020763 |               |
| <i>Salmo caspius</i>                     | 505  | 30.1 | 23.4 | 28.9 | 17.6 | 59.0 | 41.0 | MT789707  |               |
| <i>Salmo caspius</i>                     | 505  | 30.1 | 23.4 | 28.9 | 17.6 | 59.0 | 41.0 | MT789708  |               |
| <i>Salmo caspius</i>                     | 505  | 30.1 | 23.4 | 28.9 | 17.6 | 59.0 | 41.0 | NC 058188 |               |
| <i>Salmo ischchan</i>                    | 1013 | 31.6 | 22.8 | 31.4 | 14.2 | 63.0 | 37.0 | MG551590  |               |
| <i>Salmo ischchan</i>                    | 1013 | 31.6 | 22.8 | 31.4 | 14.2 | 63.0 | 37.0 | MG599465  |               |
| <i>Salmo ischchan</i>                    | 1013 | 31.6 | 22.8 | 31.5 | 14.1 | 63.1 | 36.9 | MG940849  |               |
| <i>Salmo ischchan</i>                    | 1013 | 31.6 | 22.8 | 31.5 | 14.1 | 63.1 | 36.9 | MG940850  |               |
| <i>Salmo ischchan</i>                    | 1013 | 31.6 | 22.8 | 31.4 | 14.2 | 63.0 | 37.0 | NC 037399 |               |

|                                 |      |      |      |      |      |      |      |           |
|---------------------------------|------|------|------|------|------|------|------|-----------|
| <i>Salmo ischchan</i>           | 1012 | 31.6 | 22.8 | 31.3 | 14.2 | 62.9 | 37.1 | MG551591  |
| <i>Salmo ischchan</i>           | 1013 | 31.6 | 22.8 | 31.4 | 14.2 | 63.0 | 37.0 | MG599466  |
| <i>Salmo ischchan gegarkuni</i> | 1013 | 31.6 | 22.8 | 31.4 | 14.2 | 63.0 | 37.0 | MG551588  |
| <i>Salmo ischchan gegarkuni</i> | 1013 | 31.6 | 22.8 | 31.5 | 14.1 | 63.1 | 36.9 | MG551589  |
| <i>Salmo ischchan gegarkuni</i> | 1013 | 31.4 | 23.0 | 31.4 | 14.2 | 62.8 | 37.2 | MG940853  |
| <i>Salmo ischchan gegarkuni</i> | 505  | 30.1 | 23.4 | 28.9 | 17.6 | 59.0 | 41.0 | MT789703  |
| <i>Salmo ischchan gegarkuni</i> | 505  | 29.9 | 23.6 | 28.9 | 17.6 | 58.8 | 41.2 | MT789704  |
| <i>Salmo obtusirostris</i>      | 1012 | 31.6 | 22.9 | 31.3 | 14.1 | 62.9 | 37.1 | NC 037939 |
| <i>Salmo salar</i>              | 1008 | 31.6 | 22.2 | 31.5 | 14.6 | 63.2 | 36.8 | AF133701  |
| <i>Salmo salar</i>              | 1008 | 31.7 | 22.1 | 31.6 | 14.5 | 63.4 | 36.6 | JQ390055  |
| <i>Salmo salar</i>              | 1006 | 31.7 | 22.2 | 31.6 | 14.5 | 63.3 | 36.7 | JQ390056  |
| <i>Salmo salar</i>              | 1006 | 31.7 | 22.2 | 31.6 | 14.5 | 63.3 | 36.7 | KF792729  |
| <i>Salmo salar</i>              | 1006 | 31.8 | 22.1 | 31.3 | 14.8 | 63.1 | 36.9 | NC 001960 |
| <i>Salmo salar</i>              | 1006 | 31.8 | 22.1 | 31.3 | 14.8 | 63.1 | 36.9 | U12143    |
| <i>Salmo trutta</i>             | 1013 | 31.6 | 22.7 | 31.6 | 14.1 | 63.2 | 36.8 | JQ390057  |
| <i>Salmo trutta</i>             | 1012 | 31.6 | 22.7 | 31.6 | 14.0 | 63.2 | 36.8 | MF621760  |
| <i>Salmo trutta</i>             | 1012 | 31.6 | 22.7 | 31.6 | 14.0 | 63.2 | 36.8 | MF621761  |
| <i>Salmo trutta</i>             | 1012 | 31.5 | 22.9 | 31.5 | 14.0 | 63.0 | 37.0 | MF621762  |
| <i>Salmo trutta</i>             | 1012 | 31.6 | 22.7 | 31.6 | 14.0 | 63.2 | 36.8 | MF621763  |
| <i>Salmo trutta</i>             | 1013 | 31.6 | 22.7 | 31.6 | 14.1 | 63.2 | 36.8 | NC 024032 |
| <i>Salmo trutta fario</i>       | 1013 | 31.7 | 22.7 | 31.6 | 14.0 | 63.3 | 36.7 | KT633607  |
| <i>Salmo trutta fario</i>       | 1012 | 31.2 | 14.2 | 31.8 | 22.7 | 63.0 | 37.0 | KT634053  |
| <i>Salmo trutta fario</i>       | 505  | 30.1 | 23.4 | 28.9 | 17.6 | 59.0 | 41.0 | MT789706  |
| <i>Salmo trutta fario</i>       | 505  | 30.1 | 23.4 | 28.9 | 17.6 | 59.0 | 41.0 | MT789705  |
| <i>Salmo trutta trutta</i>      | 1013 | 31.7 | 22.8 | 31.5 | 14.0 | 63.2 | 36.8 | NC 010007 |
| <i>Salvelinus albus</i>         | 994  | 30.1 | 22.8 | 31.9 | 15.2 | 62.0 | 38.0 | KT266871  |
| <i>Salvelinus albus</i>         | 994  | 30.1 | 22.8 | 31.9 | 15.2 | 62.0 | 38.0 | NC 028018 |
| <i>Salvelinus albus</i>         | 994  | 30.1 | 22.8 | 31.9 | 15.2 | 62.0 | 38.0 | KT266870  |
| <i>Salvelinus alpinus</i>       | 991  | 30.0 | 22.6 | 32.7 | 14.7 | 62.7 | 37.3 | MF621740  |
| <i>Salvelinus alpinus</i>       | 995  | 30.3 | 22.6 | 32.3 | 14.9 | 62.5 | 37.5 | MT880631  |
| <i>Salvelinus alpinus</i>       | 996  | 30.2 | 22.7 | 32.0 | 15.1 | 62.2 | 37.8 | MT880632  |
| <i>Salvelinus alpinus</i>       | 997  | 30.2 | 22.8 | 32.2 | 14.8 | 62.4 | 37.6 | MT880633  |
| <i>Salvelinus alpinus</i>       | 994  | 30.0 | 22.6 | 32.7 | 14.7 | 62.7 | 37.3 | MT880635  |
| <i>Salvelinus alpinus</i>       | 995  | 30.3 | 22.6 | 32.2 | 15.0 | 62.4 | 37.6 | MT880638  |
| <i>Salvelinus alpinus</i>       | 994  | 30.0 | 22.6 | 32.7 | 14.7 | 62.7 | 37.3 | MT880641  |
| <i>Salvelinus alpinus</i>       | 994  | 30.0 | 22.6 | 32.7 | 14.7 | 62.7 | 37.3 | MT880642  |
| <i>Salvelinus alpinus</i>       | 994  | 30.0 | 22.6 | 32.7 | 14.7 | 62.7 | 37.3 | MT880643  |
| <i>Salvelinus alpinus</i>       | 994  | 30.0 | 22.6 | 32.7 | 14.7 | 62.7 | 37.3 | MT880644  |
| <i>Salvelinus alpinus</i>       | 994  | 30.0 | 22.6 | 32.7 | 14.7 | 62.7 | 37.3 | MT880645  |
| <i>Salvelinus alpinus</i>       | 994  | 30.0 | 22.6 | 32.7 | 14.7 | 62.7 | 37.3 | MT880646  |
| <i>Salvelinus alpinus</i>       | 994  | 30.0 | 22.6 | 32.7 | 14.7 | 62.7 | 37.3 | MT880648  |
| <i>Salvelinus alpinus</i>       | 994  | 30.0 | 22.6 | 32.7 | 14.7 | 62.7 | 37.3 | MT880649  |
| <i>Salvelinus alpinus</i>       | 995  | 29.9 | 22.6 | 32.8 | 14.7 | 62.7 | 37.3 | MT880650  |
| <i>Salvelinus alpinus</i>       | 995  | 29.9 | 22.6 | 32.8 | 14.7 | 62.7 | 37.3 | MT880652  |
| <i>Salvelinus alpinus</i>       | 994  | 30.0 | 22.6 | 32.7 | 14.7 | 62.7 | 37.3 | MT880654  |
| <i>Salvelinus alpinus</i>       | 995  | 29.9 | 22.6 | 32.8 | 14.7 | 62.7 | 37.3 | MT880655  |
| <i>Salvelinus alpinus</i>       | 994  | 30.0 | 22.6 | 32.7 | 14.7 | 62.7 | 37.3 | MT880656  |
| <i>Salvelinus alpinus</i>       | 995  | 29.9 | 22.6 | 32.8 | 14.7 | 62.7 | 37.3 | MT880657  |
| <i>Salvelinus alpinus</i>       | 995  | 29.9 | 22.6 | 32.8 | 14.7 | 62.7 | 37.3 | MT880658  |
| <i>Salvelinus alpinus</i>       | 995  | 30.3 | 22.6 | 32.1 | 15.1 | 62.3 | 37.7 | MT880660  |
| <i>Salvelinus alpinus</i>       | 995  | 30.3 | 22.6 | 32.0 | 15.2 | 62.2 | 37.8 | MT880661  |

|                           |     |      |      |      |      |      |      |           |
|---------------------------|-----|------|------|------|------|------|------|-----------|
| <i>Salvelinus alpinus</i> | 995 | 30.3 | 22.6 | 32.1 | 15.1 | 62.3 | 37.7 | MT880662  |
| <i>Salvelinus alpinus</i> | 994 | 30.0 | 22.6 | 32.7 | 14.7 | 62.7 | 37.3 | MT880669  |
| <i>Salvelinus alpinus</i> | 994 | 30.0 | 22.6 | 32.7 | 14.7 | 62.7 | 37.3 | MT880673  |
| <i>Salvelinus alpinus</i> | 994 | 30.0 | 22.6 | 32.7 | 14.7 | 62.7 | 37.3 | MT880674  |
| <i>Salvelinus alpinus</i> | 994 | 30.0 | 22.6 | 32.7 | 14.7 | 62.7 | 37.3 | MT880675  |
| <i>Salvelinus alpinus</i> | 994 | 30.0 | 22.6 | 32.7 | 14.7 | 62.7 | 37.3 | MT880676  |
| <i>Salvelinus alpinus</i> | 994 | 30.0 | 22.6 | 32.7 | 14.7 | 62.7 | 37.3 | MT880679  |
| <i>Salvelinus alpinus</i> | 995 | 30.4 | 22.5 | 32.2 | 15.0 | 62.5 | 37.5 | MT880680  |
| <i>Salvelinus alpinus</i> | 994 | 30.0 | 22.6 | 32.7 | 14.7 | 62.7 | 37.3 | MT880683  |
| <i>Salvelinus alpinus</i> | 996 | 30.2 | 22.7 | 32.1 | 15.0 | 62.3 | 37.7 | MT880685  |
| <i>Salvelinus alpinus</i> | 994 | 30.0 | 22.6 | 32.7 | 14.7 | 62.7 | 37.3 | MT880688  |
| <i>Salvelinus alpinus</i> | 994 | 30.0 | 22.6 | 32.7 | 14.7 | 62.7 | 37.3 | MT880689  |
| <i>Salvelinus alpinus</i> | 994 | 30.0 | 22.6 | 32.7 | 14.7 | 62.7 | 37.3 | MT880690  |
| <i>Salvelinus alpinus</i> | 995 | 30.3 | 22.6 | 32.2 | 15.0 | 62.4 | 37.6 | MT880691  |
| <i>Salvelinus alpinus</i> | 994 | 30.1 | 22.6 | 32.7 | 14.6 | 62.8 | 37.2 | MT880692  |
| <i>Salvelinus alpinus</i> | 994 | 30.0 | 22.6 | 32.7 | 14.7 | 62.7 | 37.3 | MT880699  |
| <i>Salvelinus alpinus</i> | 994 | 30.0 | 22.6 | 32.7 | 14.7 | 62.7 | 37.3 | MT880700  |
| <i>Salvelinus alpinus</i> | 994 | 30.0 | 22.6 | 32.7 | 14.7 | 62.7 | 37.3 | MT880702  |
| <i>Salvelinus alpinus</i> | 994 | 30.1 | 22.5 | 32.6 | 14.8 | 62.7 | 37.3 | MT880703  |
| <i>Salvelinus alpinus</i> | 994 | 30.0 | 22.6 | 32.7 | 14.7 | 62.7 | 37.3 | MT880705  |
| <i>Salvelinus alpinus</i> | 995 | 30.2 | 22.7 | 32.3 | 14.9 | 62.4 | 37.6 | MT880708  |
| <i>Salvelinus alpinus</i> | 995 | 30.4 | 22.5 | 32.2 | 15.0 | 62.5 | 37.5 | MT880710  |
| <i>Salvelinus alpinus</i> | 995 | 30.2 | 22.7 | 32.3 | 14.9 | 62.4 | 37.6 | MT880711  |
| <i>Salvelinus alpinus</i> | 995 | 30.4 | 22.5 | 32.2 | 15.0 | 62.5 | 37.5 | MT880714  |
| <i>Salvelinus alpinus</i> | 995 | 30.4 | 22.5 | 32.2 | 15.0 | 62.5 | 37.5 | MT880720  |
| <i>Salvelinus alpinus</i> | 995 | 30.3 | 22.6 | 32.2 | 15.0 | 62.4 | 37.6 | MT880721  |
| <i>Salvelinus alpinus</i> | 998 | 30.3 | 22.6 | 32.2 | 14.9 | 62.4 | 37.6 | NC 000861 |
| <i>Salvelinus alpinus</i> | 998 | 30.3 | 22.6 | 32.2 | 14.9 | 62.4 | 37.6 | AF154851  |
| <i>Salvelinus alpinus</i> | 993 | 30.1 | 22.7 | 32.3 | 14.9 | 62.4 | 37.6 | MF621741  |
| <i>Salvelinus alpinus</i> | 993 | 30.2 | 22.8 | 32.0 | 15.0 | 62.2 | 37.8 | MF621743  |
| <i>Salvelinus alpinus</i> | 994 | 30.0 | 22.6 | 32.7 | 14.7 | 62.7 | 37.3 | MN530962  |
| <i>Salvelinus alpinus</i> | 994 | 30.0 | 22.6 | 32.7 | 14.7 | 62.7 | 37.3 | MN530963  |
| <i>Salvelinus alpinus</i> | 996 | 30.2 | 22.7 | 32.1 | 15.0 | 62.3 | 37.7 | MT880634  |
| <i>Salvelinus alpinus</i> | 995 | 30.3 | 22.6 | 32.2 | 15.0 | 62.4 | 37.6 | MT880636  |
| <i>Salvelinus alpinus</i> | 994 | 30.0 | 22.6 | 32.7 | 14.7 | 62.7 | 37.3 | MT880637  |
| <i>Salvelinus alpinus</i> | 994 | 30.0 | 22.6 | 32.7 | 14.7 | 62.7 | 37.3 | MT880639  |
| <i>Salvelinus alpinus</i> | 994 | 30.0 | 22.6 | 32.7 | 14.7 | 62.7 | 37.3 | MT880640  |
| <i>Salvelinus alpinus</i> | 994 | 30.0 | 22.6 | 32.7 | 14.7 | 62.7 | 37.3 | MT880647  |
| <i>Salvelinus alpinus</i> | 995 | 30.3 | 22.6 | 32.2 | 15.0 | 62.4 | 37.6 | MT880651  |
| <i>Salvelinus alpinus</i> | 995 | 29.9 | 22.6 | 32.8 | 14.7 | 62.7 | 37.3 | MT880653  |
| <i>Salvelinus alpinus</i> | 995 | 30.3 | 22.6 | 32.2 | 15.0 | 62.4 | 37.6 | MT880659  |
| <i>Salvelinus alpinus</i> | 995 | 30.3 | 22.6 | 32.1 | 15.1 | 62.3 | 37.7 | MT880663  |
| <i>Salvelinus alpinus</i> | 995 | 30.3 | 22.6 | 32.1 | 15.1 | 62.3 | 37.7 | MT880664  |
| <i>Salvelinus alpinus</i> | 995 | 30.3 | 22.6 | 32.1 | 15.1 | 62.3 | 37.7 | MT880665  |
| <i>Salvelinus alpinus</i> | 995 | 30.3 | 22.6 | 32.1 | 15.1 | 62.3 | 37.7 | MT880666  |
| <i>Salvelinus alpinus</i> | 995 | 30.3 | 22.6 | 32.1 | 15.1 | 62.3 | 37.7 | MT880667  |
| <i>Salvelinus alpinus</i> | 995 | 30.3 | 22.6 | 32.1 | 15.1 | 62.3 | 37.7 | MT880668  |
| <i>Salvelinus alpinus</i> | 994 | 30.0 | 22.6 | 32.7 | 14.7 | 62.7 | 37.3 | MT880670  |
| <i>Salvelinus alpinus</i> | 994 | 30.0 | 22.6 | 32.7 | 14.7 | 62.7 | 37.3 | MT880671  |
| <i>Salvelinus alpinus</i> | 994 | 30.0 | 22.6 | 32.7 | 14.7 | 62.7 | 37.3 | MT880672  |
| <i>Salvelinus alpinus</i> | 994 | 30.0 | 22.6 | 32.7 | 14.7 | 62.7 | 37.3 | MT880677  |

|                                                        |     |      |      |      |      |      |      |           |
|--------------------------------------------------------|-----|------|------|------|------|------|------|-----------|
| <i>Salvelinus alpinus</i>                              | 994 | 30.0 | 22.6 | 32.7 | 14.7 | 62.7 | 37.3 | MT880678  |
| <i>Salvelinus alpinus</i>                              | 995 | 30.3 | 22.6 | 32.2 | 15.0 | 62.4 | 37.6 | MT880681  |
| <i>Salvelinus alpinus</i>                              | 996 | 30.2 | 22.7 | 32.1 | 15.0 | 62.3 | 37.7 | MT880682  |
| <i>Salvelinus alpinus</i>                              | 998 | 30.2 | 22.8 | 32.1 | 14.9 | 62.2 | 37.8 | MT880684  |
| <i>Salvelinus alpinus</i>                              | 994 | 30.0 | 22.6 | 32.7 | 14.7 | 62.7 | 37.3 | MT880686  |
| <i>Salvelinus alpinus</i>                              | 994 | 30.0 | 22.6 | 32.7 | 14.7 | 62.7 | 37.3 | MT880687  |
| <i>Salvelinus alpinus</i>                              | 995 | 30.3 | 22.6 | 32.2 | 15.0 | 62.4 | 37.6 | MT880693  |
| <i>Salvelinus alpinus</i>                              | 994 | 30.1 | 22.5 | 32.7 | 14.7 | 62.8 | 37.2 | MT880694  |
| <i>Salvelinus alpinus</i>                              | 994 | 30.1 | 22.5 | 32.7 | 14.7 | 62.8 | 37.2 | MT880695  |
| <i>Salvelinus alpinus</i>                              | 994 | 30.0 | 22.6 | 32.7 | 14.7 | 62.7 | 37.3 | MT880696  |
| <i>Salvelinus alpinus</i>                              | 994 | 30.0 | 22.6 | 32.7 | 14.7 | 62.7 | 37.3 | MT880697  |
| <i>Salvelinus alpinus</i>                              | 994 | 30.0 | 22.6 | 32.7 | 14.7 | 62.7 | 37.3 | MT880698  |
| <i>Salvelinus alpinus</i>                              | 994 | 30.0 | 22.6 | 32.7 | 14.7 | 62.7 | 37.3 | MT880701  |
| <i>Salvelinus alpinus</i>                              | 994 | 30.0 | 22.6 | 32.7 | 14.7 | 62.7 | 37.3 | MT880704  |
| <i>Salvelinus alpinus</i>                              | 994 | 30.0 | 22.6 | 32.7 | 14.7 | 62.7 | 37.3 | MT880706  |
| <i>Salvelinus alpinus</i>                              | 994 | 30.0 | 22.6 | 32.7 | 14.7 | 62.7 | 37.3 | MT880707  |
| <i>Salvelinus alpinus</i>                              | 993 | 30.2 | 22.6 | 32.3 | 14.9 | 62.5 | 37.5 | MT880709  |
| <i>Salvelinus alpinus</i>                              | 995 | 30.2 | 22.7 | 32.3 | 14.9 | 62.4 | 37.6 | MT880712  |
| <i>Salvelinus alpinus</i>                              | 995 | 30.3 | 22.6 | 32.2 | 15.0 | 62.4 | 37.6 | MT880713  |
| <i>Salvelinus alpinus</i>                              | 995 | 30.2 | 22.7 | 32.3 | 14.9 | 62.4 | 37.6 | MT880715  |
| <i>Salvelinus alpinus</i>                              | 995 | 30.4 | 22.5 | 32.2 | 15.0 | 62.5 | 37.5 | MT880716  |
| <i>Salvelinus alpinus</i>                              | 995 | 30.4 | 22.5 | 32.2 | 15.0 | 62.5 | 37.5 | MT880717  |
| <i>Salvelinus alpinus</i>                              | 995 | 30.4 | 22.5 | 32.2 | 15.0 | 62.5 | 37.5 | MT880718  |
| <i>Salvelinus alpinus</i>                              | 995 | 30.4 | 22.5 | 32.2 | 15.0 | 62.5 | 37.5 | MT880719  |
| <i>Salvelinus alpinus</i>                              | 995 | 30.4 | 22.5 | 32.2 | 15.0 | 62.5 | 37.5 | MT880722  |
| <i>Salvelinus alpinus</i>                              | 995 | 30.4 | 22.5 | 32.1 | 15.1 | 62.4 | 37.6 | MT880723  |
| <i>Salvelinus alpinus</i>                              | 995 | 30.3 | 22.6 | 32.2 | 15.0 | 62.4 | 37.6 | MT880724  |
| <i>Salvelinus alpinus alpinus</i>                      | 995 | 30.3 | 22.6 | 32.2 | 15.0 | 62.4 | 37.6 | MN957796  |
| <i>Salvelinus alpinus alpinus</i>                      | 997 | 30.2 | 22.8 | 32.1 | 14.9 | 62.3 | 37.7 | MN957795  |
| <i>Salvelinus alpinus alpinus</i>                      | 995 | 30.3 | 22.6 | 32.1 | 15.1 | 62.3 | 37.7 | MN957797  |
| <i>Salvelinus alpinus erythrinus</i>                   | 994 | 30.0 | 22.6 | 32.7 | 14.7 | 62.7 | 37.3 | MW664921  |
| <i>Salvelinus alpinus erythrinus</i>                   | 994 | 30.0 | 22.6 | 32.7 | 14.7 | 62.7 | 37.3 | MW664922  |
| <i>Salvelinus boganidae</i>                            | 994 | 30.1 | 22.4 | 32.7 | 14.8 | 62.8 | 37.2 | NC 046706 |
| <i>Salvelinus boganidae</i>                            | 994 | 30.1 | 22.4 | 32.7 | 14.8 | 62.8 | 37.2 | MK695623  |
| <i>Salvelinus curilus</i>                              | 994 | 30.4 | 22.7 | 31.7 | 15.2 | 62.1 | 37.9 | KJ746619  |
| <i>Salvelinus curilus</i>                              | 994 | 30.4 | 22.7 | 31.7 | 15.2 | 62.1 | 37.9 | NC 024585 |
| <i>Salvelinus elgyticus</i>                            | 994 | 29.9 | 22.7 | 32.3 | 15.1 | 62.2 | 37.8 | MK695624  |
| <i>Salvelinus elgyticus</i>                            | 994 | 29.9 | 22.7 | 32.3 | 15.1 | 62.2 | 37.8 | NC 046707 |
| <i>Salvelinus elgyticus</i>                            | 994 | 29.9 | 22.7 | 32.4 | 15.0 | 62.3 | 37.7 | MK695625  |
| <i>Salvelinus fontinalis</i>                           | 964 | 29.7 | 22.7 | 32.0 | 15.7 | 61.6 | 38.4 | AF154850  |
| <i>Salvelinus fontinalis</i>                           | 964 | 29.8 | 22.5 | 32.0 | 15.8 | 61.7 | 38.3 | MF621737  |
| <i>Salvelinus fontinalis</i>                           | 964 | 29.7 | 22.7 | 32.0 | 15.7 | 61.6 | 38.4 | MF621739  |
| <i>Salvelinus fontinalis</i>                           | 964 | 29.7 | 22.7 | 32.0 | 15.7 | 61.6 | 38.4 | NC 000860 |
| <i>Salvelinus fontinalis</i>                           | 964 | 29.7 | 22.7 | 32.0 | 15.7 | 61.6 | 38.4 | MF621738  |
| <i>Salvelinus fontinalis</i> x <i>Salvelinus malma</i> | 963 | 29.5 | 23.3 | 32.7 | 14.5 | 62.2 | 37.8 | MK270623  |
| <i>Salvelinus fontinalis</i> x <i>Salvelinus malma</i> | 963 | 29.5 | 23.3 | 32.7 | 14.5 | 62.2 | 37.8 | NC 042195 |
| <i>Salvelinus kuznetzovi</i>                           | 995 | 30.1 | 22.9 | 31.9 | 15.2 | 61.9 | 38.1 | KU674352  |
| <i>Salvelinus kuznetzovi</i>                           | 995 | 30.1 | 22.9 | 32.0 | 15.1 | 62.0 | 38.0 | KU674351  |
| <i>Salvelinus kuznetzovi</i>                           | 995 | 30.1 | 22.9 | 32.0 | 15.1 | 62.0 | 38.0 | NC 029877 |
| <i>Salvelinus leucomaenis</i>                          | 999 | 29.2 | 22.9 | 32.5 | 15.3 | 61.8 | 38.2 | KF513161  |



|                                |      |      |      |      |      |      |      |           |
|--------------------------------|------|------|------|------|------|------|------|-----------|
| <i>Salvelinus leucomaenis</i>  | 997  | 29.5 | 22.9 | 32.5 | 15.1 | 62.0 | 38.0 | KF974451  |
| <i>Salvelinus leucomaenis</i>  | 997  | 29.4 | 22.9 | 32.5 | 15.2 | 61.9 | 38.1 | KF974452  |
| <i>Salvelinus leucomaenis</i>  | 997  | 29.5 | 22.9 | 32.5 | 15.1 | 62.0 | 38.0 | MN972433  |
| <i>Salvelinus leucomaenis</i>  | 997  | 29.5 | 22.9 | 32.5 | 15.1 | 62.0 | 38.0 | MN972434  |
| <i>Salvelinus leucomaenis</i>  | 997  | 29.5 | 22.9 | 32.5 | 15.1 | 62.0 | 38.0 | MN972435  |
| <i>Salvelinus leucomaenis</i>  | 999  | 29.2 | 22.9 | 32.5 | 15.3 | 61.8 | 38.2 | NC 022844 |
| <i>Salvelinus levanidovi</i>   | 966  | 30.4 | 23.0 | 31.3 | 15.3 | 61.7 | 38.3 | MK695626  |
| <i>Salvelinus levanidovi</i>   | 966  | 30.4 | 23.0 | 31.3 | 15.3 | 61.7 | 38.3 | NC 046708 |
| <i>Salvelinus malma</i>        | 995  | 30.2 | 22.8 | 32.2 | 14.9 | 62.3 | 37.7 | KJ746618  |
| <i>Salvelinus malma</i>        | 992  | 29.2 | 23.3 | 32.2 | 15.3 | 61.4 | 38.6 | MF680544  |
| <i>Salvelinus malma</i>        | 993  | 30.2 | 22.7 | 32.1 | 15.0 | 62.3 | 37.7 | MN530959  |
| <i>Salvelinus malma</i>        | 993  | 30.2 | 22.7 | 32.0 | 15.1 | 62.2 | 37.8 | MN530960  |
| <i>Salvelinus malma</i>        | 993  | 30.2 | 22.7 | 32.0 | 15.1 | 62.2 | 37.8 | MN530961  |
| <i>Salvelinus malma</i>        | 992  | 29.2 | 23.3 | 32.2 | 15.3 | 61.4 | 38.6 | NC 037502 |
| <i>Salvelinus namaycush</i>    | 994  | 29.8 | 23.5 | 31.8 | 14.9 | 61.6 | 38.4 | MF621745  |
| <i>Salvelinus namaycush</i>    | 992  | 29.6 | 23.7 | 31.8 | 14.9 | 61.4 | 38.6 | MF621742  |
| <i>Salvelinus namaycush</i>    | 994  | 29.8 | 23.5 | 31.8 | 14.9 | 61.6 | 38.4 | MF621744  |
| <i>Salvelinus namaycush</i>    | 993  | 29.8 | 23.5 | 31.8 | 14.9 | 61.6 | 38.4 | MF621746  |
| <i>Salvelinus namaycush</i>    | 995  | 29.6 | 23.7 | 31.8 | 14.9 | 61.4 | 38.6 | MF621747  |
| <i>Salvelinus namaycush</i>    | 994  | 29.8 | 23.4 | 31.8 | 15.0 | 61.6 | 38.4 | MF621748  |
| <i>Salvelinus namaycush</i>    | 992  | 29.6 | 23.7 | 31.8 | 14.9 | 61.4 | 38.6 | NC 036392 |
| <i>Salvelinus schmidtii</i>    | 994  | 30.2 | 22.7 | 32.1 | 15.0 | 62.3 | 37.7 | MW664923  |
| <i>Salvelinus schmidtii</i>    | 996  | 30.1 | 22.9 | 32.0 | 15.0 | 62.1 | 37.9 | MW664924  |
| <i>Salvelinus schmidtii</i>    | 994  | 30.2 | 22.7 | 32.1 | 15.0 | 62.3 | 37.7 | NC 059927 |
| <i>Salvelinus sp.</i>          | 994  | 30.1 | 22.5 | 32.5 | 14.9 | 62.6 | 37.4 | MW181766  |
| <i>Salvelinus sp.</i>          | 994  | 30.1 | 22.5 | 32.6 | 14.8 | 62.7 | 37.3 | MW181767  |
| <i>Salvelinus sp.</i>          | 994  | 30.1 | 22.5 | 32.5 | 14.9 | 62.6 | 37.4 | MW181768  |
| <i>Salvelinus taranetzi</i>    | 994  | 30.1 | 22.5 | 32.5 | 14.9 | 62.6 | 37.4 | MK695630  |
| <i>Salvelinus taranetzi</i>    | 994  | 30.1 | 22.5 | 32.4 | 15.0 | 62.5 | 37.5 | MK695631  |
| <i>Salvelinus taranetzi</i>    | 994  | 30.1 | 22.5 | 32.5 | 14.9 | 62.6 | 37.4 | NC 046710 |
| <i>Salvethymus svetovidovi</i> | 993  | 30.3 | 22.5 | 32.6 | 14.6 | 62.9 | 37.1 | MK695628  |
| <i>Salvethymus svetovidovi</i> | 993  | 30.4 | 22.3 | 32.7 | 14.6 | 63.1 | 36.9 | MK695629  |
| <i>Salvethymus svetovidovi</i> | 993  | 30.4 | 22.4 | 32.7 | 14.5 | 63.1 | 36.9 | NC 046709 |
| <i>Salvethymus svetovidovi</i> | 993  | 30.4 | 22.4 | 32.7 | 14.5 | 63.1 | 36.9 | MK695627  |
| <i>Stenodus leucichthys</i>    | 1204 | 30.8 | 24.2 | 30.6 | 14.4 | 61.5 | 38.5 | JQ390059  |
| <i>Stenodus leucichthys</i>    | 1204 | 30.8 | 24.2 | 30.6 | 14.4 | 61.5 | 38.5 | NC 020761 |
| <i>Thymallus aeliani</i>       | 1001 | 31.6 | 20.9 | 32.6 | 15.0 | 64.1 | 35.9 | MT063008  |
| <i>Thymallus aeliani</i>       | 1001 | 31.7 | 20.9 | 32.5 | 15.0 | 64.1 | 35.9 | MT063009  |
| <i>Thymallus aeliani</i>       | 1001 | 31.6 | 20.9 | 32.6 | 15.0 | 64.1 | 35.9 | NC 056304 |
| <i>Thymallus arcticus</i>      | 1003 | 32.6 | 20.0 | 33.4 | 14.0 | 66.0 | 34.0 | MF621754  |
| <i>Thymallus arcticus</i>      | 1003 | 32.6 | 19.9 | 33.5 | 14.0 | 66.1 | 33.9 | MF621755  |
| <i>Thymallus arcticus</i>      | 1003 | 32.6 | 20.0 | 33.4 | 14.0 | 66.0 | 34.0 | MF621758  |
| <i>Thymallus arcticus</i>      | 1003 | 32.3 | 20.0 | 33.4 | 14.3 | 65.7 | 34.3 | MT063011  |
| <i>Thymallus arcticus</i>      | 1003 | 32.4 | 20.0 | 33.3 | 14.3 | 65.7 | 34.3 | MT063014  |
| <i>Thymallus arcticus</i>      | 1003 | 32.6 | 19.8 | 33.4 | 14.2 | 66.0 | 34.0 | MT063015  |
| <i>Thymallus arcticus</i>      | 1003 | 32.6 | 19.8 | 33.4 | 14.2 | 66.0 | 34.0 | MT063017  |
| <i>Thymallus arcticus</i>      | 1000 | 32.5 | 20.0 | 33.3 | 14.2 | 65.8 | 34.2 | FJ872559  |
| <i>Thymallus arcticus</i>      | 1001 | 32.5 | 20.7 | 32.2 | 14.7 | 64.6 | 35.4 | KJ866481  |
| <i>Thymallus arcticus</i>      | 1003 | 32.6 | 20.0 | 33.5 | 13.9 | 66.1 | 33.9 | MF621752  |
| <i>Thymallus arcticus</i>      | 1003 | 32.6 | 20.0 | 33.4 | 14.0 | 66.0 | 34.0 | MF621753  |
| <i>Thymallus arcticus</i>      | 1003 | 32.5 | 19.9 | 33.5 | 14.1 | 66.0 | 34.0 | MF621756  |

|                                        |      |      |      |      |      |      |      |           |
|----------------------------------------|------|------|------|------|------|------|------|-----------|
| <i>Thymallus arcticus</i>              | 1003 | 32.6 | 20.0 | 33.4 | 14.0 | 66.0 | 34.0 | MF621757  |
| <i>Thymallus arcticus</i>              | 1002 | 32.5 | 20.0 | 33.3 | 14.2 | 65.9 | 34.1 | MT063010  |
| <i>Thymallus arcticus</i>              | 1004 | 32.7 | 19.8 | 33.3 | 14.2 | 65.9 | 34.1 | MT063012  |
| <i>Thymallus arcticus</i>              | 1002 | 32.3 | 20.0 | 33.2 | 14.5 | 65.6 | 34.4 | MT063013  |
| <i>Thymallus arcticus</i>              | 1003 | 32.6 | 19.8 | 33.4 | 14.2 | 66.0 | 34.0 | MT063016  |
| <i>Thymallus arcticus</i>              | 1002 | 32.5 | 20.0 | 33.3 | 14.2 | 65.9 | 34.1 | NC 056305 |
| <i>Thymallus baicalensis</i>           | 1004 | 33.0 | 20.2 | 32.4 | 14.4 | 65.3 | 34.7 | MT063022  |
| <i>Thymallus baicalensis</i>           | 1003 | 33.1 | 20.1 | 32.4 | 14.4 | 65.5 | 34.5 | MT063024  |
| <i>Thymallus baicalensis</i>           | 1004 | 33.0 | 20.2 | 32.4 | 14.4 | 65.3 | 34.7 | NC 056306 |
| <i>Thymallus baicalensis</i>           | 1003 | 32.9 | 20.2 | 32.4 | 14.5 | 65.3 | 34.7 | MT063023  |
| <i>Thymallus baicalensis</i>           | 1003 | 33.0 | 20.0 | 32.6 | 14.4 | 65.6 | 34.4 | MT063025  |
| <i>Thymallus baicalensis</i>           | 1003 | 33.0 | 20.0 | 32.5 | 14.5 | 65.5 | 34.5 | MT063026  |
| <i>Thymallus baicalensis</i>           | 1003 | 33.0 | 20.0 | 32.6 | 14.4 | 65.6 | 34.4 | MT063027  |
| <i>Thymallus baicalolenensis</i>       | 1003 | 32.9 | 19.9 | 32.7 | 14.5 | 65.6 | 34.4 | KY078221  |
| <i>Thymallus baicalolenensis</i>       | 1002 | 32.8 | 20.1 | 32.7 | 14.4 | 65.6 | 34.4 | MT063021  |
| <i>Thymallus baicalolenensis</i>       | 1004 | 32.9 | 19.9 | 32.7 | 14.5 | 65.5 | 34.5 | KJ866482  |
| <i>Thymallus baicalolenensis</i>       | 1003 | 33.0 | 19.8 | 32.7 | 14.5 | 65.7 | 34.3 | MT063018  |
| <i>Thymallus baicalolenensis</i>       | 1002 | 33.0 | 20.0 | 32.6 | 14.4 | 65.7 | 34.3 | MT063019  |
| <i>Thymallus baicalolenensis</i>       | 1003 | 33.0 | 19.7 | 32.6 | 14.7 | 65.6 | 34.4 | MT063020  |
| <i>Thymallus baicalolenensis</i>       | 1003 | 32.9 | 19.9 | 32.7 | 14.5 | 65.6 | 34.4 | NC 034294 |
| <i>Thymallus brevicephalus</i>         | 1001 | 32.6 | 20.6 | 32.2 | 14.7 | 64.7 | 35.3 | MT063034  |
| <i>Thymallus brevicephalus</i>         | 1001 | 32.6 | 20.6 | 32.2 | 14.7 | 64.7 | 35.3 | NC 056310 |
| <i>Thymallus brevicephalus</i>         | 1003 | 32.6 | 20.5 | 32.3 | 14.6 | 64.9 | 35.1 | MT063035  |
| <i>Thymallus brevicephalus</i>         | 1003 | 32.4 | 20.7 | 32.3 | 14.6 | 64.7 | 35.3 | MT063036  |
| <i>Thymallus brevirostris</i>          | 1003 | 32.3 | 20.8 | 32.2 | 14.7 | 64.5 | 35.5 | KJ866486  |
| <i>Thymallus brevirostris</i>          | 1003 | 32.3 | 20.8 | 32.2 | 14.7 | 64.5 | 35.5 | MH027384  |
| <i>Thymallus brevirostris</i>          | 1003 | 32.5 | 20.6 | 32.2 | 14.7 | 64.7 | 35.3 | MT063033  |
| <i>Thymallus brevirostris</i>          | 1003 | 32.3 | 20.8 | 32.2 | 14.7 | 64.5 | 35.5 | NC 027412 |
| <i>Thymallus burejensis</i>            | 1002 | 33.0 | 20.4 | 31.9 | 14.7 | 65.0 | 35.0 | MT063037  |
| <i>Thymallus burejensis</i>            | 1004 | 32.8 | 20.4 | 32.0 | 14.8 | 64.7 | 35.3 | NC 027411 |
| <i>Thymallus burejensis</i>            | 1004 | 32.8 | 20.4 | 32.0 | 14.8 | 64.7 | 35.3 | KJ866485  |
| <i>Thymallus burejensis</i>            | 1002 | 32.9 | 20.4 | 32.1 | 14.6 | 65.1 | 34.9 | KY078220  |
| <i>Thymallus grubii</i>                | 1000 | 32.3 | 20.6 | 32.4 | 14.7 | 64.7 | 35.3 | KY078219  |
| <i>Thymallus grubii</i>                | 1003 | 32.3 | 20.7 | 32.4 | 14.6 | 64.7 | 35.3 | KF649073  |
| <i>Thymallus grubii</i>                | 997  | 32.5 | 20.7 | 32.1 | 14.7 | 64.6 | 35.4 | KF692113  |
| <i>Thymallus grubii</i>                | 1000 | 32.3 | 20.6 | 32.4 | 14.7 | 64.7 | 35.3 | MT063038  |
| <i>Thymallus grubii</i>                | 1003 | 32.3 | 20.7 | 32.4 | 14.6 | 64.7 | 35.3 | NC 022925 |
| <i>Thymallus grubii flavomaculatus</i> | 1000 | 32.5 | 20.9 | 32.1 | 14.5 | 64.6 | 35.4 | KU674353  |
| <i>Thymallus grubii flavomaculatus</i> | 1000 | 32.4 | 21.1 | 31.8 | 14.7 | 64.2 | 35.8 | KY078215  |
| <i>Thymallus grubii flavomaculatus</i> | 1000 | 32.4 | 20.8 | 32.2 | 14.6 | 64.6 | 35.4 | KY078216  |
| <i>Thymallus grubii flavomaculatus</i> | 1000 | 32.5 | 21.0 | 31.8 | 14.7 | 64.3 | 35.7 | MT063039  |
| <i>Thymallus grubii flavomaculatus</i> | 1000 | 32.4 | 20.9 | 32.1 | 14.6 | 64.5 | 35.5 | KU674354  |
| <i>Thymallus ligericus</i>             | 1000 | 32.0 | 20.6 | 32.9 | 14.5 | 64.9 | 35.1 | MT063046  |
| <i>Thymallus ligericus</i>             | 999  | 32.1 | 20.5 | 32.9 | 14.4 | 65.1 | 34.9 | MT063053  |
| <i>Thymallus ligericus</i>             | 1000 | 32.0 | 20.6 | 32.9 | 14.5 | 64.9 | 35.1 | MT063007  |
| <i>Thymallus ligericus</i>             | 1000 | 32.0 | 20.6 | 32.9 | 14.5 | 64.9 | 35.1 | MT063047  |
| <i>Thymallus ligericus</i>             | 1000 | 31.9 | 20.7 | 32.9 | 14.5 | 64.8 | 35.2 | MT063048  |
| <i>Thymallus ligericus</i>             | 1000 | 31.9 | 20.7 | 32.9 | 14.5 | 64.8 | 35.2 | MT063049  |
| <i>Thymallus ligericus</i>             | 1000 | 31.9 | 20.7 | 32.9 | 14.5 | 64.8 | 35.2 | MT063050  |
| <i>Thymallus ligericus</i>             | 999  | 32.1 | 20.5 | 32.9 | 14.4 | 65.1 | 34.9 | MT063051  |
| <i>Thymallus ligericus</i>             | 1000 | 32.0 | 20.6 | 33.0 | 14.4 | 65.0 | 35.0 | MT063052  |

|                              |      |      |      |      |      |      |      |           |
|------------------------------|------|------|------|------|------|------|------|-----------|
| <i>Thymallus ligericus</i>   | 1000 | 32.0 | 20.6 | 32.9 | 14.5 | 64.9 | 35.1 | NC 056303 |
| <i>Thymallus mertensii</i>   | 1004 | 32.3 | 20.4 | 33.3 | 14.0 | 65.5 | 34.5 | KT867088  |
| <i>Thymallus mertensii</i>   | 1004 | 32.3 | 20.4 | 33.3 | 14.0 | 65.5 | 34.5 | KT867089  |
| <i>Thymallus mertensii</i>   | 1004 | 32.3 | 20.4 | 33.3 | 14.0 | 65.5 | 34.5 | NC 029216 |
| <i>Thymallus nigrescens</i>  | 1003 | 33.1 | 20.2 | 32.5 | 14.2 | 65.6 | 34.4 | MT063028  |
| <i>Thymallus nigrescens</i>  | 1003 | 33.1 | 20.2 | 32.5 | 14.2 | 65.6 | 34.4 | NC 056307 |
| <i>Thymallus nikolskyi</i>   | 1003 | 32.9 | 20.1 | 32.3 | 14.7 | 65.2 | 34.8 | MT063029  |
| <i>Thymallus nikolskyi</i>   | 1003 | 32.8 | 20.2 | 32.3 | 14.7 | 65.1 | 34.9 | MT063030  |
| <i>Thymallus nikolskyi</i>   | 1003 | 32.9 | 20.1 | 32.3 | 14.7 | 65.2 | 34.8 | NC 056308 |
| <i>Thymallus pallasii</i>    | 1004 | 32.9 | 19.9 | 32.7 | 14.5 | 65.5 | 34.5 | NC 027408 |
| <i>Thymallus svetovidovi</i> | 1002 | 32.4 | 20.5 | 32.1 | 15.0 | 64.6 | 35.4 | MT063032  |
| <i>Thymallus svetovidovi</i> | 1002 | 32.4 | 20.5 | 32.1 | 15.0 | 64.6 | 35.4 | MT063031  |
| <i>Thymallus svetovidovi</i> | 1002 | 32.4 | 20.5 | 32.1 | 15.0 | 64.6 | 35.4 | NC 056309 |
| <i>Thymallus thymallus</i>   | 1001 | 32.1 | 20.6 | 32.4 | 15.0 | 64.4 | 35.6 | FJ853655  |
| <i>Thymallus thymallus</i>   | 1000 | 32.2 | 20.5 | 32.7 | 14.6 | 64.9 | 35.1 | MT062994  |
| <i>Thymallus thymallus</i>   | 1000 | 32.2 | 20.5 | 32.8 | 14.5 | 65.0 | 35.0 | MT062995  |
| <i>Thymallus thymallus</i>   | 1000 | 32.1 | 20.5 | 33.0 | 14.4 | 65.1 | 34.9 | MT062999  |
| <i>Thymallus thymallus</i>   | 1000 | 32.2 | 20.4 | 33.0 | 14.4 | 65.2 | 34.8 | MT063000  |
| <i>Thymallus thymallus</i>   | 999  | 32.2 | 20.5 | 32.6 | 14.6 | 64.9 | 35.1 | MT063001  |
| <i>Thymallus thymallus</i>   | 1001 | 32.2 | 20.6 | 32.6 | 14.7 | 64.7 | 35.3 | MT063002  |
| <i>Thymallus thymallus</i>   | 1002 | 32.0 | 20.7 | 32.7 | 14.6 | 64.8 | 35.2 | MT063004  |
| <i>Thymallus thymallus</i>   | 1000 | 31.9 | 20.9 | 32.6 | 14.6 | 64.5 | 35.5 | MT063041  |
| <i>Thymallus thymallus</i>   | 1002 | 32.1 | 20.6 | 32.7 | 14.6 | 64.9 | 35.1 | MT063045  |
| <i>Thymallus thymallus</i>   | 1166 | 32.7 | 20.1 | 33.1 | 14.2 | 65.8 | 34.2 | MT062993  |
| <i>Thymallus thymallus</i>   | 1000 | 32.2 | 20.5 | 32.7 | 14.6 | 64.9 | 35.1 | MT062996  |
| <i>Thymallus thymallus</i>   | 1000 | 32.1 | 20.8 | 32.1 | 15.0 | 64.2 | 35.8 | MT062997  |
| <i>Thymallus thymallus</i>   | 1000 | 32.1 | 20.7 | 32.2 | 15.0 | 64.3 | 35.7 | MT062998  |
| <i>Thymallus thymallus</i>   | 1003 | 32.0 | 20.7 | 32.7 | 14.6 | 64.7 | 35.3 | MT063003  |
| <i>Thymallus thymallus</i>   | 1002 | 31.9 | 20.9 | 32.5 | 14.7 | 64.5 | 35.5 | MT063005  |
| <i>Thymallus thymallus</i>   | 1002 | 32.0 | 20.9 | 32.6 | 14.5 | 64.7 | 35.3 | MT063006  |
| <i>Thymallus thymallus</i>   | 1001 | 32.0 | 20.9 | 32.6 | 14.6 | 64.5 | 35.5 | MT063040  |
| <i>Thymallus thymallus</i>   | 1002 | 32.0 | 20.9 | 32.6 | 14.5 | 64.7 | 35.3 | MT063042  |
| <i>Thymallus thymallus</i>   | 1000 | 31.9 | 20.9 | 32.7 | 14.5 | 64.6 | 35.4 | MT063043  |
| <i>Thymallus thymallus</i>   | 997  | 31.9 | 20.8 | 32.5 | 14.8 | 64.4 | 35.6 | MT063044  |
| <i>Thymallus thymallus</i>   | 1008 | 31.7 | 20.9 | 32.8 | 14.5 | 64.6 | 35.4 | MT410870  |
| <i>Thymallus thymallus</i>   | 1001 | 32.1 | 20.6 | 32.4 | 15.0 | 64.4 | 35.6 | NC 012928 |
| <i>Thymallus tugarinae</i>   | 1002 | 32.5 | 20.7 | 31.9 | 14.9 | 64.5 | 35.5 | NC 027409 |
| <i>Thymallus tugarinae</i>   | 1002 | 32.5 | 20.7 | 31.9 | 14.9 | 64.5 | 35.5 | KJ866483  |
| <i>Thymallus tugarinae</i>   | 1004 | 32.7 | 20.5 | 32.0 | 14.8 | 64.6 | 35.4 | KY078217  |
| <i>Thymallus tugarinae</i>   | 1003 | 32.5 | 20.8 | 31.8 | 14.9 | 64.3 | 35.7 | KY078218  |
| <i>Thymallus yaluensis</i>   | 999  | 32.2 | 20.8 | 31.9 | 15.0 | 64.2 | 35.8 | KJ866484  |
| <i>Thymallus yaluensis</i>   | 999  | 32.2 | 20.8 | 31.9 | 15.0 | 64.2 | 35.8 | NC 027410 |
